# Supplementary material for: Density functional theory studies on the skeletal isomerization of 1-butene catalyzed by HZSM-23 and HZSM-48 zeolites
Source: Royal Society of Chemistry journal article supplement (doi:10.1039/c6ra26894c), 2017-01-01
Supplement: c6ra26894c1.pdf [file c6ra26894c1.pdf]

## Supporting information

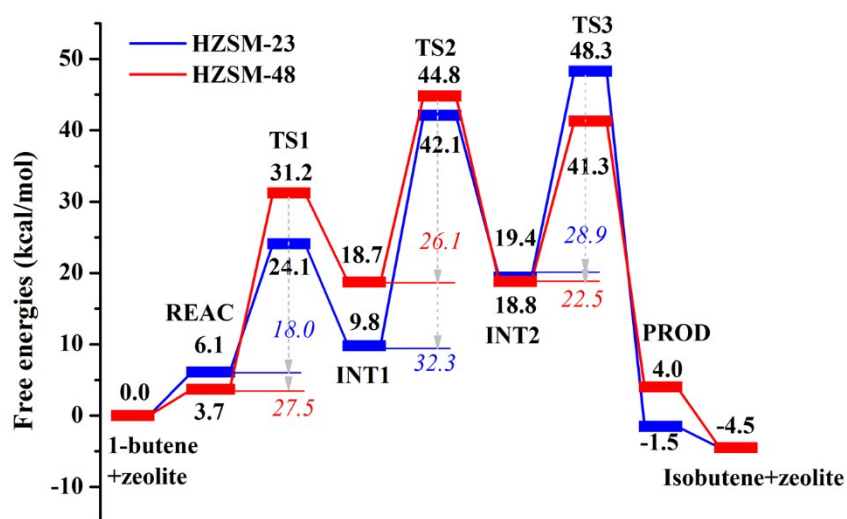

**Fig. S1** Free energy profiles of the skeletal isomerization of 1-butene over HZSM-23 and HZSM-48 zeolites at 700 K. The energies in italic are activation energies ( $E_{an}, n=1,2,3$ ), whereas the energies in bold are energy barriers.

**Table S1.** Comparison of calculated reaction energetics with or without harmonic entropy correction ( $T=700$  K) (kcal/mol)

|                   | without entropy |         | with entropy |         |
|-------------------|-----------------|---------|--------------|---------|
|                   | HZSM-23         | HZSM-48 | HZSM-23      | HZSM-48 |
| 1-butene+zeolite  | 0.0             | 0.0     | 0.0          | 0.0     |
| Adsorption        | -19.0           | -19.8   | 6.1          | 3.7     |
| TS1               | -7.8            | 0.3     | 24.1         | 31.2    |
| INT1              | -21.8           | -13.8   | 9.8          | 18.7    |
| TS2               | 13.3            | 18.0    | 42.1         | 44.8    |
| INT2              | -13.1           | -13.9   | 19.4         | 18.8    |
| TS3               | 15.8            | 11.5    | 48.3         | 41.3    |
| Product           | -27.8           | -21.6   | -1.5         | 4.0     |
| Isobutene+zeolite | -4.2            | -4.2    | -4.5         | -4.5    |

## Appendix:

The coordinates for all stationary points :

### S1. The coordinates for the adsorption of 1-butene on HZSM-23

|        |    |          |         |          |   |      |     |    |    |
|--------|----|----------|---------|----------|---|------|-----|----|----|
| O-O_2  | -1 | 3.29007  | 3.95874 | -4.95187 | L |      |     |    |    |
| O-O_2  | -1 | -3.33808 | 3.90375 | -4.95837 | L |      |     |    |    |
| Si-Si3 | -1 | -0.01685 | 3.17755 | -5.98797 | L |      |     |    |    |
| Si-Si3 | -1 | -2.92423 | 2.59327 | -5.7257  | L |      |     |    |    |
| O-O_2  | -1 | -3.5467  | 1.28608 | -5.11008 | L |      |     |    |    |
| O-O_2  | -1 | -1.32507 | 2.3509  | -5.60314 | L |      |     |    |    |
| Si-Si3 | -1 | 2.89888  | 2.64158 | -5.71999 | L |      |     |    |    |
| O-O_2  | -1 | 3.54174  | 1.3449  | -5.10313 | L |      |     |    |    |
| O-O_2  | -1 | 1.30437  | 2.37271 | -5.60057 | L |      |     |    |    |
| O-O_2  | -1 | -0.02908 | 4.56604 | -5.25836 | L |      |     |    |    |
| O-O_2  | -1 | -3.34916 | 4.97235 | -2.70052 | L |      |     |    |    |
| O-O_2  | -1 | 3.26782  | 6.10194 | -0.42344 | L | H-H_ | 28  | 0. | 0. |
| O-O_2  | -1 | 3.279    | 5.02741 | -2.69401 | L | H-H_ | 28  | 0. | 0. |
| O-O_2  | -1 | -3.3603  | 6.04696 | -0.42999 | L |      |     |    |    |
| Si-Si3 | -1 | -0.03907 | 5.32077 | -1.45959 | L |      |     |    |    |
| Si-Si3 | -1 | -0.0414  | 5.96545 | -4.53614 | L |      |     |    |    |
| Si-Si3 | -1 | 6.28701  | 1.40849 | -2.34827 | L | H-H_ | 169 | 0. | 0. |
| Si-Si3 | -1 | 7.07507  | 4.06664 | -3.60254 | L |      |     |    |    |
| O-O_2  | -1 | 7.149    | 2.62369 | -2.91924 | L |      |     |    |    |
| O-O_2  | -1 | 5.61821  | 4.60506 | -3.86451 | L |      |     |    |    |
| Si-Si3 | -1 | -6.29731 | 1.30397 | -2.36063 | L |      |     |    |    |
| Si-Si3 | -1 | -7.12763 | 3.9488  | -3.61646 | L |      |     |    |    |
| O-O_2  | -1 | -7.1783  | 2.50482 | -2.93329 | L |      |     |    |    |
| O-O_2  | -1 | -5.6794  | 4.51133 | -3.87559 | L |      |     |    |    |
| Si-Si3 | -1 | -2.94645 | 4.73648 | -1.19732 | L |      |     |    |    |
| O-O_2  | -1 | -3.56892 | 3.4293  | -0.5817  | L |      |     |    |    |
| O-O_2  | -1 | -1.34729 | 4.49412 | -1.07476 | L |      |     |    |    |
| Si-Si3 | -1 | 2.87671  | 4.78476 | -1.19183 | H |      |     |    |    |
| O-O_2  | -1 | 3.51938  | 3.48793 | -0.57413 | H |      |     |    |    |
| O-O_2  | -1 | 1.28217  | 4.51581 | -1.0723  | L | H-H_ | 28  | 0. | 0. |
| Si-Si3 | -1 | -4.16734 | 4.92105 | -4.06209 | L |      |     |    |    |
| Si-Si3 | -1 | -2.79174 | 7.33912 | -5.19977 | L |      |     |    |    |
| O-O_2  | -1 | -1.36471 | 6.73526 | -4.90697 | L |      |     |    |    |
| O-O_2  | -1 | -3.99992 | 6.37839 | -4.751   | L |      |     |    |    |
| Si-Si3 | -1 | 4.10057  | 4.98965 | -4.05398 | L |      |     |    |    |
| Si-Si3 | -1 | 2.68728  | 7.38458 | -5.1944  | L |      |     |    |    |
| O-O_2  | -1 | 1.26925  | 6.75711 | -4.90439 | L |      |     |    |    |
| O-O_2  | -1 | 3.91035  | 6.44402 | -4.74324 | L |      |     |    |    |
| O-O_2  | -1 | -0.04019 | 5.6368  | -2.99598 | L |      |     |    |    |

|        |    |          |          |          |   |      |     |    |    |
|--------|----|----------|----------|----------|---|------|-----|----|----|
| O-O_2  | -1 | -0.05131 | 6.70926  | -0.72998 | L |      |     |    |    |
| O-O_2  | -1 | -3.37138 | 7.11557  | 1.82786  | L |      |     |    |    |
| O-O_2  | -1 | 3.25676  | 7.17056  | 1.83436  | L |      |     |    |    |
| Si-Si3 | -1 | -0.06129 | 7.46399  | 3.0688   | L |      |     |    |    |
| Si-Si3 | -1 | -0.06362 | 8.10867  | -0.00776 | L |      |     |    |    |
| Si-Si3 | -1 | 6.26473  | 3.55174  | 2.18     | L | H-H_ | 172 | 0. | 0. |
| Si-Si3 | -1 | 7.05285  | 6.20986  | 0.92585  | L |      |     |    |    |
| O-O_2  | -1 | 7.12677  | 4.7669   | 1.60914  | L |      |     |    |    |
| O-O_2  | -1 | 5.59599  | 6.74828  | 0.66387  | L |      |     |    |    |
| Si-Si3 | -1 | -6.31954 | 3.44719  | 2.16775  | L |      |     |    |    |
| Si-Si3 | -1 | -7.14986 | 6.09202  | 0.91192  | L |      |     |    |    |
| O-O_2  | -1 | -7.20053 | 4.64803  | 1.59509  | L |      |     |    |    |
| O-O_2  | -1 | -5.70162 | 6.65454  | 0.65279  | L |      |     |    |    |
| Si-Si3 | -1 | -2.96867 | 6.8797   | 3.33106  | L |      |     |    |    |
| O-O_2  | -1 | -3.59114 | 5.57252  | 3.94668  | L |      |     |    |    |
| O-O_2  | -1 | -1.36951 | 6.63733  | 3.45362  | L |      |     |    |    |
| Si-Si3 | -1 | 2.85443  | 6.92801  | 3.33677  | L |      |     |    |    |
| O-O_2  | -1 | 3.4973   | 5.63133  | 3.95363  | L |      |     |    |    |
| O-O_2  | -1 | 1.25992  | 6.65915  | 3.4562   | L |      |     |    |    |
| Si-Si3 | -1 | -4.18956 | 7.06427  | 0.46629  | L |      |     |    |    |
| Si-Si3 | -1 | -2.81396 | 9.48234  | -0.67139 | L |      |     |    |    |
| O-O_2  | -1 | -1.38693 | 8.87848  | -0.37859 | L |      |     |    |    |
| O-O_2  | -1 | -4.02214 | 8.5216   | -0.22262 | L |      |     |    |    |
| Si-Si3 | -1 | 4.07835  | 7.13287  | 0.4744   | L |      |     |    |    |
| Si-Si3 | -1 | 2.66505  | 9.52779  | -0.66602 | L |      |     |    |    |
| O-O_2  | -1 | 1.24702  | 8.90033  | -0.37601 | L |      |     |    |    |
| O-O_2  | -1 | 3.88812  | 8.58723  | -0.21486 | L |      |     |    |    |
| O-O_2  | -1 | -0.06241 | 7.78001  | 1.5324   | L |      |     |    |    |
| O-O_2  | -1 | 8.03693  | -7.18579 | -2.42934 | L |      |     |    |    |
| O-O_2  | -1 | -7.91543 | -6.24601 | -0.17987 | L |      |     |    |    |
| O-O_2  | -1 | -7.42009 | -2.47329 | -1.968   | L |      |     |    |    |
| O-O_2  | -1 | -2.75283 | -3.45437 | -4.24831 | L |      |     |    |    |
| O-O_2  | -1 | -3.24814 | -7.23051 | -2.46743 | L |      |     |    |    |
| O-O_2  | 0  | 2.81459  | -2.33589 | -1.97845 | H |      |     |    |    |
| O-O_2  | -1 | 3.36893  | -6.10098 | -0.19039 | L |      |     |    |    |
| O-O_2  | -1 | 2.82496  | -3.40809 | -4.24284 | L |      |     |    |    |
| O-O_2  | -1 | 3.38     | -7.17552 | -2.46093 | L |      |     |    |    |
| O-O_2  | -1 | -2.76395 | -2.38333 | -1.98509 | H |      |     |    |    |
| O-O_2  | -1 | -3.25929 | -6.15591 | -0.1969  | L |      |     |    |    |
| O-O_2  | -1 | -7.90431 | -7.31805 | -2.44497 | L |      |     |    |    |
| O-O_2  | -1 | 8.02581  | -6.11375 | -0.16424 | L |      |     |    |    |
| O-O_2  | -1 | 7.47145  | -2.34974 | -1.9534  | L |      |     |    |    |
| Si-Si3 | -1 | 0.06183  | -6.88213 | -1.22644 | L | H-H_ | 117 | 0. | 0. |
| Si-Si3 | -1 | 0.05961  | -6.23742 | -4.30305 | L |      |     |    |    |

|        |    |          |          |          |   |      |    |    |    |
|--------|----|----------|----------|----------|---|------|----|----|----|
| Si-Si3 | -1 | 7.17609  | -8.13623 | -3.36944 | L |      |    |    |    |
| O-O_2  | -1 | 5.71923  | -7.59811 | -3.63127 | L |      |    |    |    |
| Si-Si3 | -1 | -7.02662 | -8.25406 | -3.38337 | L |      |    |    |    |
| O-O_2  | -1 | -5.57838 | -7.69184 | -3.64235 | L |      |    |    |    |
| Si-Si3 | -1 | -4.46085 | 0.12678  | -4.56589 | L |      |    |    |    |
| Si-Si3 | -1 | -3.63061 | -2.51824 | -3.30987 | L | H-H_ | 77 | 0. | 0. |
| Si-Si3 | -1 | -2.84543 | -7.46669 | -0.96408 | L |      |    |    |    |
| O-O_2  | -1 | -3.57986 | -1.07436 | -3.99308 | L |      |    |    |    |
| O-O_2  | -1 | -5.07877 | -3.08057 | -3.05093 | L |      |    |    |    |
| O-O_2  | -1 | -1.24628 | -7.70875 | -0.84167 | L |      |    |    |    |
| Si-Si3 | -1 | 4.47394  | 0.20091  | -4.55713 | L |      |    |    |    |
| Si-Si3 | -1 | 3.6853   | -2.45842 | -3.303   | L | H-H_ | 73 | 0. | 0. |
| Si-Si3 | -1 | 2.97767  | -7.41838 | -0.95837 | L |      |    |    |    |
| O-O_2  | -1 | 3.61187  | -1.0147  | -3.98603 | L |      |    |    |    |
| O-O_2  | -1 | 5.14266  | -2.99577 | -3.0409  | L |      |    |    |    |
| O-O_2  | -1 | 1.38316  | -7.68694 | -0.83909 | L |      |    |    |    |
| Si-Si3 | -1 | 6.66094  | -3.38066 | -2.85129 | L |      |    |    |    |
| Si-Si3 | -1 | 8.07424  | -5.77528 | -1.71101 | L |      |    |    |    |
| O-O_2  | -1 | 6.85052  | -4.83472 | -2.16217 | L |      |    |    |    |
| Si-Si3 | -1 | -6.59083 | -3.4906  | -2.86429 | L |      |    |    |    |
| Si-Si3 | -1 | -7.96643 | -5.90836 | -1.72675 | L |      |    |    |    |
| O-O_2  | -1 | -6.75825 | -4.94763 | -2.17552 | L |      |    |    |    |
| Si-Si3 | -1 | -4.06632 | -7.28181 | -3.829   | L |      |    |    |    |
| Si-Si3 | -1 | -2.69072 | -4.86405 | -4.96654 | L |      |    |    |    |
| O-O_2  | -1 | -1.26369 | -5.46791 | -4.67374 | L |      |    |    |    |
| O-O_2  | -1 | -3.8989  | -5.82478 | -4.51777 | L |      |    |    |    |
| Si-Si3 | -1 | 4.20159  | -7.21321 | -3.82089 | L |      |    |    |    |
| Si-Si3 | -1 | 2.7883   | -4.81859 | -4.96116 | L |      |    |    |    |
| O-O_2  | -1 | 1.37026  | -5.44605 | -4.67115 | L |      |    |    |    |
| O-O_2  | -1 | 4.01136  | -5.75915 | -4.51001 | L |      |    |    |    |
| O-O_2  | -1 | -5.37908 | 0.71528  | -3.46321 | L |      |    |    |    |
| O-O_2  | -1 | 5.38076  | 0.80455  | -3.45266 | L |      |    |    |    |
| O-O_2  | -1 | 0.06083  | -6.56595 | -2.76184 | L |      |    |    |    |
| O-O_2  | -1 | 0.0499   | -5.49376 | -0.49673 | H |      |    |    |    |
| O-O_2  | -1 | 8.01471  | -5.043   | 2.09814  | L |      |    |    |    |
| O-O_2  | -1 | 7.46032  | -1.27516 | 0.31714  | L |      |    |    |    |
| O-O_2  | -1 | -7.93765 | -4.1028  | 4.34851  | L |      |    |    |    |
| O-O_2  | -1 | -7.44231 | -0.33007 | 2.56038  | L |      |    |    |    |
| O-O_2  | -1 | -2.7752  | -1.31074 | 0.28083  | H |      |    |    |    |
| O-O_2  | -1 | -3.27036 | -5.0873  | 2.06095  | L |      |    |    |    |
| O-O_2  | 0  | 2.60369  | -0.19841 | 2.58583  | H |      |    |    |    |
| O-O_2  | -1 | 3.34664  | -3.9577  | 4.33798  | L |      |    |    |    |
| O-O_3  | 0  | 2.56865  | -1.27566 | 0.2572   | H |      |    |    |    |
| O-O_2  | -1 | 3.35781  | -5.03242 | 2.06747  | L |      |    |    |    |

|        |    |          |          |          |   |      |     |    |    |
|--------|----|----------|----------|----------|---|------|-----|----|----|
| O-O_2  | -1 | -2.78598 | -0.23993 | 2.5433   | H |      |     |    |    |
| O-O_2  | -1 | -3.28151 | -4.01269 | 4.33148  | L |      |     |    |    |
| O-O_2  | -1 | -7.92653 | -5.17526 | 2.08251  | L |      |     |    |    |
| O-O_2  | -1 | -7.43123 | -1.39868 | 0.30253  | L |      |     |    |    |
| O-O_2  | -1 | 8.00359  | -3.97053 | 4.36414  | L |      |     |    |    |
| O-O_2  | -1 | 7.44923  | -0.20655 | 2.575    | L |      |     |    |    |
| Si-Si3 | -1 | 0.0397   | -4.73893 | 3.30188  | L | H-H_ | 173 | 0. | 0. |
| Si-Si3 | -1 | 0.03819  | -4.13602 | 0.24131  | H |      |     |    |    |
| Si-Si3 | -1 | 7.15386  | -5.99301 | 1.15894  | L |      |     |    |    |
| Si-Si3 | -1 | 7.86199  | -1.03229 | -1.18542 | L |      |     |    |    |
| O-O_2  | -1 | 7.21913  | 0.2641   | -1.80214 | L |      |     |    |    |
| O-O_2  | -1 | 5.69701  | -5.45492 | 0.89705  | L |      |     |    |    |
| Si-Si3 | -1 | -7.04884 | -6.11085 | 1.14501  | L |      |     |    |    |
| Si-Si3 | -1 | -7.83394 | -1.16251 | -1.20082 | L |      |     |    |    |
| O-O_2  | -1 | -7.21147 | 0.14437  | -1.81629 | L |      |     |    |    |
| O-O_2  | -1 | -5.6006  | -5.54863 | 0.88603  | L |      |     |    |    |
| Si-Si3 | -1 | -4.48308 | 2.27     | -0.03751 | L |      |     |    |    |
| Si-Si3 | -1 | -3.65278 | -0.37518 | 1.21837  | H |      |     |    |    |
| Si-Si3 | -1 | -2.86766 | -5.32347 | 3.5643   | L |      |     |    |    |
| O-O_2  | -1 | -3.60206 | 1.06885  | 0.53529  | L | H-H_ | 145 | 0. | 0. |
| O-O_2  | -1 | -5.10098 | -0.9373  | 1.4776   | L | H-H_ | 145 | 0. | 0. |
| O-O_2  | -1 | -1.2685  | -5.56554 | 3.68671  | L |      |     |    |    |
| Si-Si3 | 0  | 4.43804  | 2.32388  | -0.02118 | H |      |     |    |    |
| Si-Si3 | -1 | 2.95545  | -5.27516 | 3.57001  | L |      |     |    |    |
| O-O_2  | 0  | 3.36782  | 1.23844  | 0.38819  | H |      |     |    |    |
| O-O_2  | 0  | 5.11098  | -0.87524 | 1.42283  | H |      |     |    |    |
| O-O_2  | -1 | 1.36094  | -5.54372 | 3.68929  | L |      |     |    |    |
| Si-Si3 | -1 | 6.63866  | -1.23735 | 1.67701  | L | H-H_ | 153 | 0. | 0. |
| Si-Si3 | -1 | 8.05201  | -3.63206 | 2.81737  | L |      |     |    |    |
| O-O_2  | -1 | 6.8283   | -2.69151 | 2.36621  | L |      |     |    |    |
| Si-Si3 | -1 | -6.61305 | -1.34739 | 1.66409  | L |      |     |    |    |
| Si-Si3 | -1 | -7.98865 | -3.76515 | 2.80164  | L |      |     |    |    |
| O-O_2  | -1 | -6.78048 | -2.80441 | 2.35286  | L |      |     |    |    |
| Si-Si3 | -1 | -4.08854 | -5.1386  | 0.69939  | L |      |     |    |    |
| Si-Si3 | -1 | -2.71273 | -2.72106 | -0.43807 | H |      |     |    |    |
| O-O_2  | -1 | -1.25742 | -3.30884 | -0.14187 | H |      |     |    |    |
| O-O_2  | -1 | -3.92115 | -3.68151 | 0.01065  | L | H-H_ | 162 | 0. | 0. |
| Si-Si3 | -1 | 4.1791   | -5.06956 | 0.70737  | L | H-H_ | 168 | 0. | 0. |
| Si-Si3 | 0  | 2.81309  | -2.74551 | -0.46212 | H |      |     |    |    |
| O-O_2  | 0  | 1.43555  | -3.4608  | -0.14664 | H |      |     |    |    |
| O-O_2  | 0  | 4.12449  | -3.54639 | 0.01927  | H |      |     |    |    |
| O-O_2  | -1 | 5.36934  | 1.87611  | -1.1884  | H |      |     |    |    |
| O-O_2  | -1 | -5.4013  | 2.85849  | 1.06517  | L |      |     |    |    |
| O-O_2  | -1 | -5.39019 | 1.78689  | -1.19902 | L |      |     |    |    |

|        |    |          |          |          |   |      |     |    |    |
|--------|----|----------|----------|----------|---|------|-----|----|----|
| O-O_2  | -1 | 5.35853  | 2.94728  | 1.07564  | H |      |     |    |    |
| O-O_2  | -1 | 0.03855  | -4.42299 | 1.76522  | H |      |     |    |    |
| O-O_2  | -1 | 0.02749  | -3.35069 | 4.03164  | L |      |     |    |    |
| O-O_2  | -1 | 7.43809  | 0.86809  | 4.84551  | L |      |     |    |    |
| O-O_2  | -1 | -2.79729 | 0.8325   | 4.80936  | L |      |     |    |    |
| O-O_2  | -1 | 2.78082  | 0.87902  | 4.81414  | H |      |     |    |    |
| O-O_2  | -1 | -7.45345 | 0.74453  | 4.83091  | L |      |     |    |    |
| Si-Si3 | -1 | 0.01509  | -1.95048 | 4.7545   | L | H-H_ | 204 | 0. | 0. |
| Si-Si3 | -1 | 7.13164  | -3.84979 | 5.68732  | L |      |     |    |    |
| Si-Si3 | -1 | 7.83977  | 1.11093  | 3.34296  | L |      |     |    |    |
| O-O_2  | -1 | 7.19691  | 2.40731  | 2.72624  | L |      |     |    |    |
| O-O_2  | -1 | 5.67478  | -3.31168 | 5.42549  | L |      |     |    |    |
| Si-Si3 | -1 | -7.07106 | -3.96763 | 5.67339  | L |      |     |    |    |
| Si-Si3 | -1 | -7.85616 | 0.98071  | 3.32756  | L |      |     |    |    |
| O-O_2  | -1 | -7.23369 | 2.28759  | 2.71209  | L |      |     |    |    |
| O-O_2  | -1 | -5.62282 | -3.40541 | 5.41441  | L |      |     |    |    |
| Si-Si3 | -1 | -4.5053  | 4.41322  | 4.49087  | L |      |     |    |    |
| Si-Si3 | -1 | -3.67497 | 1.76808  | 5.74685  | L |      |     |    |    |
| O-O_2  | -1 | -3.62431 | 3.21207  | 5.06368  | L |      |     |    |    |
| O-O_2  | -1 | -5.12321 | 1.20586  | 6.00583  | L |      |     |    |    |
| Si-Si3 | -1 | 4.42949  | 4.48735  | 4.49963  | L |      |     |    |    |
| Si-Si3 | -1 | 3.64114  | 1.8286   | 5.75441  | L | H-H_ | 177 | 0. | 0. |
| O-O_2  | -1 | 3.56743  | 3.27174  | 5.07073  | L |      |     |    |    |
| O-O_2  | -1 | 5.09821  | 1.29067  | 6.01586  | L |      |     |    |    |
| Si-Si3 | -1 | 6.6165   | 0.90578  | 6.20547  | L |      |     |    |    |
| Si-Si3 | -1 | -6.63527 | 0.79583  | 6.19247  | L |      |     |    |    |
| Si-Si3 | -1 | -4.11077 | -2.99538 | 5.22776  | L |      |     |    |    |
| Si-Si3 | -1 | -2.73516 | -0.5776  | 4.09023  | L | H-H_ | 128 | 0. | 0. |
| O-O_2  | -1 | -1.30814 | -1.18147 | 4.38302  | L |      |     |    |    |
| O-O_2  | -1 | -3.94334 | -1.53835 | 4.539    | L |      |     |    |    |
| Si-Si3 | -1 | 4.15713  | -2.92685 | 5.23574  | L | H-H_ | 205 | 0. | 0. |
| Si-Si3 | 0  | 2.73348  | -0.54653 | 4.11672  | H |      |     |    |    |
| O-O_2  | -1 | 1.32586  | -1.16056 | 4.38434  | H |      |     |    |    |
| O-O_2  | -1 | 3.96698  | -1.47232 | 4.54715  | H |      |     |    |    |
| O-O_2  | -1 | 5.34742  | 4.01937  | 3.33991  | L |      |     |    |    |
| O-O_2  | -1 | -5.41242 | 3.9301   | 3.32936  | L |      |     |    |    |
| H-H_   | -1 | -7.07322 | -9.58218 | -2.75502 | L |      |     |    |    |
| H-H_   | -1 | -7.09545 | -7.43897 | 1.77336  | L |      |     |    |    |
| H-H_   | -1 | -7.11767 | -5.29575 | 6.30174  | L |      |     |    |    |
| H-H_   | -1 | -3.42716 | -8.68802 | -0.3889  | L |      |     |    |    |
| H-H_   | -1 | -3.44938 | -6.54481 | 4.13948  | L |      |     |    |    |
| H-H_   | -1 | 3.57846  | -8.6299  | -0.38203 | L |      |     |    |    |
| H-H_   | -1 | 3.55623  | -6.48668 | 4.14635  | L |      |     |    |    |
| H-H_   | -1 | 7.22186  | -7.32016 | 1.78739  | L |      |     |    |    |

|      |    |          |          |          |   |
|------|----|----------|----------|----------|---|
| H-H_ | -1 | 7.19963  | -5.17694 | 6.31577  | L |
| H-H_ | -1 | 7.9279   | -2.97106 | 6.55605  | L |
| H-H_ | -1 | -9.28323 | -0.94313 | -1.31176 | L |
| H-H_ | -1 | -7.34758 | -3.53805 | -4.12364 | L |
| H-H_ | -1 | -9.29667 | -5.34546 | -1.99969 | L |
| H-H_ | -1 | -7.82837 | -8.37912 | -4.60912 | L |
| H-H_ | -1 | -7.92938 | 3.82375  | -4.84222 | L |
| H-H_ | -1 | -7.93965 | 4.81439  | -2.74911 | L |
| H-H_ | -1 | -5.32064 | -0.33112 | -5.6668  | L |
| H-H_ | -1 | -9.30546 | 1.20009  | 3.21662  | L |
| H-H_ | -1 | -9.31889 | -3.20225 | 2.52869  | L |
| H-H_ | -1 | -7.96188 | 6.9576   | 1.77927  | L |
| H-H_ | -1 | -7.9516  | 5.96697  | -0.31383 | L |
| H-H_ | -1 | -2.87161 | 10.79076 | -0.00385 | L |
| H-H_ | -1 | 7.24408  | -9.46338 | -2.74099 | L |
| H-H_ | -1 | 9.39549  | -5.19038 | -1.98136 | L |
| H-H_ | -1 | 9.37327  | -3.04716 | 2.54702  | L |
| H-H_ | -1 | 9.30764  | -0.7888  | -1.29357 | L |
| H-H_ | -1 | 9.28542  | 1.35442  | 3.23481  | L |
| H-H_ | -1 | 7.84911  | 7.08859  | 1.79458  | L |
| H-H_ | -1 | 7.85938  | 6.09818  | -0.29806 | L |
| H-H_ | -1 | 7.87133  | 4.94538  | -2.7338  | L |
| H-H_ | -1 | 7.8816   | 3.95496  | -4.82644 | L |
| H-H_ | -1 | -2.86129 | 9.79542  | -2.10689 | L |
| H-H_ | -1 | -2.84939 | 8.64754  | -4.53223 | L |
| H-H_ | -1 | -2.83907 | 7.6522   | -6.63527 | L |
| H-H_ | -1 | 2.73162  | 7.69843  | -6.62982 | L |
| H-H_ | -1 | 2.7213   | 8.69378  | -4.52676 | L |
| H-H_ | -1 | 2.7094   | 9.84164  | -2.10144 | L |
| H-H_ | -1 | 2.69908  | 10.83699 | 0.00162  | L |
| H-H_ | -1 | -7.40228 | 1.73677  | 7.02147  | L |
| H-H_ | -1 | -5.37562 | 4.97101  | 5.53601  | L |
| H-H_ | -1 | -3.35518 | 8.1036   | 4.0477   | L |
| H-H_ | -1 | -2.87363 | 1.89347  | 6.97283  | L |
| H-H_ | -1 | -0.07276 | 8.76549  | 3.75205  | L |
| H-H_ | -1 | 2.83522  | 1.94081  | 6.97816  | L |
| H-H_ | -1 | 3.21974  | 8.15803  | 4.05407  | L |
| H-H_ | -1 | 5.28878  | 5.05935  | 5.54622  | L |
| H-H_ | -1 | 7.36616  | 1.8593   | 7.03595  | L |
| H-H_ | -1 | 3.27459  | 2.86808  | -7.123   | L |
| H-H_ | -1 | 5.34376  | -0.24253 | -5.65607 | L |
| H-H_ | -1 | 7.42085  | -3.41552 | -4.10916 | L |
| H-H_ | -1 | 7.98262  | -8.24791 | -4.59334 | L |
| H-H_ | -1 | 2.83263  | -4.5045  | -6.39653 | L |

|        |    |          |          |          |   |
|--------|----|----------|----------|----------|---|
| H-H_   | -1 | 3.45193  | -8.16674 | -4.65137 | L |
| H-H_   | -1 | 0.07111  | -7.54378 | -4.97697 | L |
| H-H_   | -1 | -2.73804 | -4.55073 | -6.40198 | L |
| H-H_   | -1 | -3.29932 | -8.22275 | -4.65799 | L |
| H-H_   | -1 | -7.88308 | -3.10205 | 6.54074  | L |
| H-H_   | -1 | -6.78717 | -0.52604 | 6.81735  | L |
| H-H_   | -1 | -3.30033 | 2.81355  | -7.1296  | L |
| H-H_   | -1 | -0.0179  | 3.47427  | -7.42771 | L |
| H-H_   | -1 | 0.01631  | -2.258   | 6.1913   | L |
| H-H_   | -1 | 3.39724  | -2.89192 | 6.49374  | L |
| H-H_   | -1 | 6.7885   | -0.41347 | 6.83069  | L |
| H-H_   | -1 | -3.35401 | -2.94793 | 6.48712  | L |
| Al-Al3 | 0  | 3.60354  | -0.17269 | 1.26305  | H |
| H-H_   | 0  | 0.73578  | 1.24069  | -1.11172 | H |
| C-C_2  | 0  | 0.14326  | 0.58413  | -0.47957 | H |
| C-C_2  | 0  | -0.07389 | 0.86969  | 0.81401  | H |
| H-H_   | 0  | -0.32767 | -0.27512 | -0.95194 | H |
| H-H_   | 0  | 1.70714  | -0.81735 | 0.09098  | H |
| H-H_   | 0  | -0.68308 | 0.18571  | 1.4021   | H |
| C-C_3  | 0  | 0.41492  | 2.0854   | 1.54979  | H |
| C-C_3  | 0  | -0.74466 | 2.91446  | 2.13341  | H |
| H-H_   | 0  | 1.03441  | 2.69691  | 0.88908  | H |
| H-H_   | 0  | 1.06534  | 1.75142  | 2.36594  | H |
| H-H_   | 0  | -0.36061 | 3.77137  | 2.69702  | H |
| H-H_   | 0  | -1.40248 | 3.29818  | 1.34799  | H |
| H-H_   | 0  | -1.3607  | 2.3134   | 2.81013  | H |

## S2. The coordinates for INT1 on HZSM-23

|        |    |          |         |          |   |      |    |    |    |
|--------|----|----------|---------|----------|---|------|----|----|----|
| O-O_2  | -1 | 3.38279  | 3.84429 | -4.98754 | L |      |    |    |    |
| O-O_2  | -1 | -3.24397 | 3.99045 | -4.97667 | L |      |    |    |    |
| Si-Si3 | -1 | 0.05094  | 3.16137 | -6.01312 | L |      |    |    |    |
| Si-Si3 | -1 | -2.87212 | 2.6662  | -5.74186 | L |      |    |    |    |
| O-O_2  | -1 | -3.53232 | 1.37998 | -5.12143 | L |      |    |    |    |
| O-O_2  | -1 | -1.28073 | 2.37571 | -5.62287 | L |      |    |    |    |
| Si-Si3 | -1 | 2.94977  | 2.53779 | -5.75141 | L |      |    |    |    |
| O-O_2  | -1 | 3.55464  | 1.22367 | -5.13305 | L |      |    |    |    |
| O-O_2  | -1 | 1.34816  | 2.31773 | -5.62718 | L |      |    |    |    |
| O-O_2  | -1 | 0.08279  | 4.55132 | -5.28689 | L |      |    |    |    |
| O-O_2  | -1 | -3.21658 | 5.06426 | -2.72143 | L |      |    |    |    |
| O-O_2  | -1 | 3.43768  | 5.99791 | -0.46434 | L | H-H_ | 28 | 0. | 0. |
| O-O_2  | -1 | 3.41019  | 4.91816 | -2.73228 | L | H-H_ | 28 | 0. | 0. |
| O-O_2  | -1 | -3.18905 | 6.14409 | -0.45352 | L |      |    |    |    |
| Si-Si3 | -1 | 0.10586  | 5.315   | -1.48996 | L |      |    |    |    |
| Si-Si3 | -1 | 0.11486  | 5.95216 | -4.56807 | L |      |    |    |    |



|        |    |          |         |          |   |      |     |    |    |
|--------|----|----------|---------|----------|---|------|-----|----|----|
| Si-Si3 | -1 | 6.30793  | 1.21045 | -2.3855  | L | H-H_ | 169 | 0. | 0. |
| Si-Si3 | -1 | 7.17292  | 3.84049 | -3.64832 | L |      |     |    |    |
| O-O_2  | -1 | 7.20486  | 2.39758 | -2.96169 | L |      |     |    |    |
| O-O_2  | -1 | 5.73237  | 4.42224 | -3.90783 | L |      |     |    |    |
| Si-Si3 | -1 | -6.27376 | 1.48785 | -2.36488 | L |      |     |    |    |
| Si-Si3 | -1 | -7.02681 | 4.15367 | -3.62503 | L |      |     |    |    |
| O-O_2  | -1 | -7.11944 | 2.71351 | -2.93819 | L |      |     |    |    |
| O-O_2  | -1 | -5.56287 | 4.67137 | -3.8893  | L |      |     |    |    |
| Si-Si3 | -1 | -2.8172  | 4.81984 | -1.21871 | L |      |     |    |    |
| O-O_2  | -1 | -3.4774  | 3.53361 | -0.59827 | L |      |     |    |    |
| O-O_2  | -1 | -1.22581 | 4.52935 | -1.09971 | L |      |     |    |    |
| Si-Si3 | -1 | 3.00474  | 4.6914  | -1.22846 | H |      |     |    |    |
| O-O_2  | -1 | 3.60942  | 3.37712 | -0.60929 | H |      |     |    |    |
| O-O_2  | -1 | 1.4031   | 4.47124 | -1.10414 | L | H-H_ | 28  | 0. | 0. |
| Si-Si3 | -1 | -4.03958 | 5.03458 | -4.08073 | L |      |     |    |    |
| Si-Si3 | -1 | -2.5943  | 7.40708 | -5.22791 | L |      |     |    |    |
| O-O_2  | -1 | -1.18547 | 6.7609  | -4.93735 | L |      |     |    |    |
| O-O_2  | -1 | -3.82986 | 6.48453 | -4.77365 | L |      |     |    |    |
| Si-Si3 | -1 | 4.2266   | 4.85227 | -4.09429 | L |      |     |    |    |
| Si-Si3 | -1 | 2.88357  | 7.28626 | -5.2369  | L |      |     |    |    |
| O-O_2  | -1 | 1.44794  | 6.70281 | -4.94167 | L |      |     |    |    |
| O-O_2  | -1 | 4.07874  | 6.31009 | -4.78662 | L |      |     |    |    |
| O-O_2  | -1 | 0.11022  | 5.62728 | -3.02712 | L |      |     |    |    |
| O-O_2  | -1 | 0.13771  | 6.70495 | -0.76373 | L |      |     |    |    |
| O-O_2  | -1 | -3.16166 | 7.21789 | 1.80173  | L |      |     |    |    |
| O-O_2  | -1 | 3.46509  | 7.07173 | 1.79086  | L |      |     |    |    |
| Si-Si3 | -1 | 0.16078  | 7.46864 | 3.03319  | L |      |     |    |    |
| Si-Si3 | -1 | 0.16978  | 8.1058  | -0.04491 | L |      |     |    |    |
| Si-Si3 | -1 | 6.36279  | 3.36413 | 2.13754  | L | H-H_ | 172 | 0. | 0. |
| Si-Si3 | -1 | 7.22784  | 5.99412 | 0.87483  | L |      |     |    |    |
| O-O_2  | -1 | 7.25978  | 4.55121 | 1.56147  | L |      |     |    |    |
| O-O_2  | -1 | 5.78729  | 6.57588 | 0.61533  | L |      |     |    |    |
| Si-Si3 | -1 | -6.21884 | 3.64148 | 2.15828  | L |      |     |    |    |
| Si-Si3 | -1 | -6.97189 | 6.30731 | 0.89812  | L |      |     |    |    |
| O-O_2  | -1 | -7.06452 | 4.86715 | 1.58496  | L |      |     |    |    |
| O-O_2  | -1 | -5.50795 | 6.82501 | 0.63386  | L |      |     |    |    |
| Si-Si3 | -1 | -2.76228 | 6.97348 | 3.30445  | L |      |     |    |    |
| O-O_2  | -1 | -3.42248 | 5.68725 | 3.92489  | L |      |     |    |    |
| O-O_2  | -1 | -1.17089 | 6.68298 | 3.42344  | L |      |     |    |    |
| Si-Si3 | -1 | 3.0596   | 6.84507 | 3.2949   | L |      |     |    |    |
| O-O_2  | -1 | 3.66448  | 5.53094 | 3.91326  | L |      |     |    |    |
| O-O_2  | -1 | 1.458    | 6.625   | 3.41913  | L |      |     |    |    |
| Si-Si3 | -1 | -3.98466 | 7.18822 | 0.44242  | L |      |     |    |    |
| Si-Si3 | -1 | -2.53937 | 9.56072 | -0.70476 | L |      |     |    |    |

|        |    |          |          |          |   |      |     |    |    |
|--------|----|----------|----------|----------|---|------|-----|----|----|
| O-O_2  | -1 | -1.13055 | 8.91453  | -0.41419 | L |      |     |    |    |
| O-O_2  | -1 | -3.77494 | 8.63816  | -0.25049 | L |      |     |    |    |
| Si-Si3 | -1 | 4.28152  | 7.0059   | 0.42886  | L |      |     |    |    |
| Si-Si3 | -1 | 2.93849  | 9.4399   | -0.71374 | L |      |     |    |    |
| O-O_2  | -1 | 1.50286  | 8.85645  | -0.41851 | L |      |     |    |    |
| O-O_2  | -1 | 4.13366  | 8.46373  | -0.26347 | L |      |     |    |    |
| O-O_2  | -1 | 0.16515  | 7.78091  | 1.49604  | L |      |     |    |    |
| O-O_2  | -1 | 7.79607  | -7.43314 | -2.45005 | L |      |     |    |    |
| O-O_2  | -1 | -8.11436 | -6.00436 | -0.16142 | L |      |     |    |    |
| O-O_2  | -1 | -7.50957 | -2.25266 | -1.96008 | L |      |     |    |    |
| O-O_2  | -1 | -2.88034 | -3.38033 | -4.25011 | L |      |     |    |    |
| O-O_2  | -1 | -3.48523 | -7.13547 | -2.45869 | L |      |     |    |    |
| O-O_2  | 0  | 2.73724  | -2.35271 | -1.99052 | H |      |     |    |    |
| O-O_2  | -1 | 3.16913  | -6.20186 | -0.20164 | L |      |     |    |    |
| O-O_2  | -1 | 2.69628  | -3.50332 | -4.25925 | L |      |     |    |    |
| O-O_2  | -1 | 3.14153  | -7.28163 | -2.46955 | L |      |     |    |    |
| O-O_2  | -1 | -2.8529  | -2.30408 | -1.98949 | H |      |     |    |    |
| O-O_2  | -1 | -3.45769 | -6.05564 | -0.19078 | L |      |     |    |    |
| O-O_2  | -1 | -8.14184 | -7.08161 | -2.42391 | L |      |     |    |    |
| O-O_2  | -1 | 7.82354  | -6.35589 | -0.18757 | L |      |     |    |    |
| O-O_2  | -1 | 7.37885  | -2.58104 | -1.9845  | L |      |     |    |    |
| Si-Si3 | -1 | -0.1629  | -6.88475 | -1.22716 | L | H-H_ | 117 | 0. | 0. |
| Si-Si3 | -1 | -0.15378 | -6.24756 | -4.30533 | L |      |     |    |    |
| Si-Si3 | -1 | 6.90427  | -8.35924 | -3.38558 | L |      |     |    |    |
| O-O_2  | -1 | 5.46372  | -7.77778 | -3.64494 | L |      |     |    |    |
| Si-Si3 | -1 | -7.29546 | -8.04605 | -3.36229 | L |      |     |    |    |
| O-O_2  | -1 | -5.83152 | -7.52866 | -3.62642 | L |      |     |    |    |
| Si-Si3 | -1 | -4.47977 | 0.25025  | -4.57202 | L |      |     |    |    |
| Si-Si3 | -1 | -3.7268  | -2.41577 | -3.31168 | L | H-H_ | 77  | 0. | 0. |
| Si-Si3 | -1 | -3.08585 | -7.38019 | -0.95582 | L |      |     |    |    |
| O-O_2  | -1 | -3.63409 | -0.97572 | -3.99856 | L |      |     |    |    |
| O-O_2  | -1 | -5.19066 | -2.93328 | -3.0476  | L |      |     |    |    |
| O-O_2  | -1 | -1.49446 | -7.67038 | -0.83697 | L |      |     |    |    |
| Si-Si3 | -1 | 4.45315  | 0.05322  | -4.58667 | L |      |     |    |    |
| Si-Si3 | -1 | 3.58755  | -2.57797 | -3.32397 | L | H-H_ | 73  | 0. | 0. |
| Si-Si3 | -1 | 2.73603  | -7.5086  | -0.96537 | L |      |     |    |    |
| O-O_2  | -1 | 3.55613  | -1.13431 | -4.01035 | L |      |     |    |    |
| O-O_2  | -1 | 5.02863  | -3.15868 | -3.06436 | L |      |     |    |    |
| O-O_2  | -1 | 1.13443  | -7.72837 | -0.84128 | L |      |     |    |    |
| Si-Si3 | -1 | 6.53504  | -3.58901 | -2.87775 | L |      |     |    |    |
| Si-Si3 | -1 | 7.87807  | -6.02271 | -1.73528 | L |      |     |    |    |
| O-O_2  | -1 | 6.68226  | -5.04652 | -2.18556 | L |      |     |    |    |
| Si-Si3 | -1 | -6.71395 | -3.29679 | -2.85602 | L |      |     |    |    |
| Si-Si3 | -1 | -8.15923 | -5.66899 | -1.70898 | L |      |     |    |    |

|        |    |          |          |          |   |      |     |    |    |
|--------|----|----------|----------|----------|---|------|-----|----|----|
| O-O_2  | -1 | -6.92367 | -4.74643 | -2.16325 | L |      |     |    |    |
| Si-Si3 | -1 | -4.30823 | -7.16514 | -3.81799 | L |      |     |    |    |
| Si-Si3 | -1 | -2.86295 | -4.79294 | -4.96503 | L |      |     |    |    |
| O-O_2  | -1 | -1.45412 | -5.43913 | -4.67446 | L |      |     |    |    |
| O-O_2  | -1 | -4.09851 | -5.7155  | -4.51076 | L |      |     |    |    |
| Si-Si3 | -1 | 3.95795  | -7.34746 | -3.83155 | L |      |     |    |    |
| Si-Si3 | -1 | 2.61492  | -4.91377 | -4.97401 | L |      |     |    |    |
| O-O_2  | -1 | 1.17928  | -5.49721 | -4.67878 | L |      |     |    |    |
| O-O_2  | -1 | 3.81009  | -5.88994 | -4.52374 | L |      |     |    |    |
| O-O_2  | -1 | -5.37677 | 0.86895  | -3.4684  | L |      |     |    |    |
| O-O_2  | -1 | 5.38082  | 0.63168  | -3.48604 | L |      |     |    |    |
| O-O_2  | -1 | -0.15842 | -6.57232 | -2.76333 | L |      |     |    |    |
| O-O_2  | -1 | -0.13075 | -5.49493 | -0.50083 | H |      |     |    |    |
| O-O_2  | -1 | 7.85098  | -5.27993 | 2.0722   | L |      |     |    |    |
| O-O_2  | -1 | 7.40639  | -1.50124 | 0.28342  | L |      |     |    |    |
| O-O_2  | -1 | -8.05945 | -3.85073 | 4.36173  | L |      |     |    |    |
| O-O_2  | -1 | -7.45465 | -0.09902 | 2.56308  | L |      |     |    |    |
| O-O_2  | -1 | -2.82555 | -1.22628 | 0.27381  | H |      |     |    |    |
| O-O_2  | -1 | -3.43031 | -4.98183 | 2.06447  | L |      |     |    |    |
| O-O_2  | 0  | 2.5063   | -0.00634 | 2.57132  | H |      |     |    |    |
| O-O_2  | -1 | 3.22398  | -4.04816 | 4.32151  | L |      |     |    |    |
| O-O_3  | 0  | 2.52798  | -1.53494 | 0.41704  | H |      |     |    |    |
| O-O_2  | -1 | 3.19647  | -5.12811 | 2.05362  | L |      |     |    |    |
| O-O_2  | -1 | -2.79779 | -0.15027 | 2.53367  | H |      |     |    |    |
| O-O_2  | -1 | -3.40277 | -3.902   | 4.33238  | L |      |     |    |    |
| O-O_2  | -1 | -8.08693 | -4.92841 | 2.09835  | L |      |     |    |    |
| O-O_2  | -1 | -7.48203 | -1.17283 | 0.30783  | L |      |     |    |    |
| O-O_2  | -1 | 7.87846  | -4.20225 | 4.33559  | L |      |     |    |    |
| O-O_2  | -1 | 7.43377  | -0.42743 | 2.53868  | L |      |     |    |    |
| Si-Si3 | -1 | -0.10789 | -4.73114 | 3.29592  | L | H-H_ | 173 | 0. | 0. |
| Si-Si3 | -1 | -0.09929 | -4.13572 | 0.23388  | H |      |     |    |    |
| Si-Si3 | -1 | 6.95919  | -6.2056  | 1.13758  | L |      |     |    |    |
| Si-Si3 | -1 | 7.81123  | -1.27423 | -1.22077 | L |      |     |    |    |
| O-O_2  | -1 | 7.20635  | 0.0396   | -1.83899 | L |      |     |    |    |
| O-O_2  | -1 | 5.51864  | -5.62417 | 0.87816  | L |      |     |    |    |
| Si-Si3 | -1 | -7.24054 | -5.89242 | 1.16087  | L |      |     |    |    |
| Si-Si3 | -1 | -7.88141 | -0.92811 | -1.19504 | L |      |     |    |    |
| O-O_2  | -1 | -7.22122 | 0.35782  | -1.81533 | L |      |     |    |    |
| O-O_2  | -1 | -5.7766  | -5.37502 | 0.89674  | L |      |     |    |    |
| Si-Si3 | -1 | -4.42484 | 2.40388  | -0.04886 | L |      |     |    |    |
| Si-Si3 | -1 | -3.67184 | -0.26229 | 1.21134  | H |      |     |    |    |
| Si-Si3 | -1 | -3.03093 | -5.22656 | 3.56734  | L |      |     |    |    |
| O-O_2  | -1 | -3.57915 | 1.17791  | 0.52459  | L | H-H_ | 145 | 0. | 0. |
| O-O_2  | -1 | -5.13573 | -0.77959 | 1.47571  | L | H-H_ | 145 | 0. | 0. |

|        |    |          |          |          |   |      |     |    |    |
|--------|----|----------|----------|----------|---|------|-----|----|----|
| O-O_2  | -1 | -1.43954 | -5.51674 | 3.68618  | L |      |     |    |    |
| Si-Si3 | 0  | 4.48512  | 2.17946  | -0.05103 | H |      |     |    |    |
| Si-Si3 | -1 | 2.79095  | -5.35496 | 3.55779  | L |      |     |    |    |
| O-O_2  | 0  | 3.42649  | 1.10798  | 0.42671  | H |      |     |    |    |
| O-O_2  | 0  | 5.07028  | -1.03745 | 1.43108  | H |      |     |    |    |
| O-O_2  | -1 | 1.18935  | -5.57473 | 3.68187  | L |      |     |    |    |
| Si-Si3 | -1 | 6.5899   | -1.43529 | 1.64533  | L | H-H_ | 153 | 0. | 0. |
| Si-Si3 | -1 | 7.93299  | -3.86908 | 2.78787  | L |      |     |    |    |
| O-O_2  | -1 | 6.73717  | -2.89289 | 2.33759  | L |      |     |    |    |
| Si-Si3 | -1 | -6.65903 | -1.14316 | 1.66714  | L |      |     |    |    |
| Si-Si3 | -1 | -8.10431 | -3.51535 | 2.81418  | L |      |     |    |    |
| O-O_2  | -1 | -6.86875 | -2.5928  | 2.35991  | L |      |     |    |    |
| Si-Si3 | -1 | -4.25331 | -5.01151 | 0.70516  | L |      |     |    |    |
| Si-Si3 | -1 | -2.80783 | -2.63955 | -0.44181 | H |      |     |    |    |
| O-O_2  | -1 | -1.37023 | -3.27049 | -0.14788 | H |      |     |    |    |
| O-O_2  | -1 | -4.04362 | -3.56181 | 0.01242  | L | H-H_ | 162 | 0. | 0. |
| Si-Si3 | -1 | 4.01262  | -5.19338 | 0.69149  | L | H-H_ | 168 | 0. | 0. |
| Si-Si3 | 0  | 2.7209   | -2.83617 | -0.46308 | H |      |     |    |    |
| O-O_2  | 0  | 1.32326  | -3.59607 | -0.23444 | H |      |     |    |    |
| O-O_2  | 0  | 4.03779  | -3.72452 | -0.05473 | H |      |     |    |    |
| O-O_2  | -1 | 5.40796  | 1.70846  | -1.22439 | H |      |     |    |    |
| O-O_2  | -1 | -5.32184 | 3.02258  | 1.05476  | L |      |     |    |    |
| O-O_2  | -1 | -5.3493  | 1.94576  | -1.20682 | L |      |     |    |    |
| O-O_2  | -1 | 5.43572  | 2.78483  | 1.03704  | H |      |     |    |    |
| O-O_2  | -1 | -0.10356 | -4.41895 | 1.75851  | H |      |     |    |    |
| O-O_2  | -1 | -0.07603 | -3.34144 | 4.02231  | L |      |     |    |    |
| O-O_2  | -1 | 7.4613   | 0.65243  | 4.80657  | L |      |     |    |    |
| O-O_2  | -1 | -2.77049 | 0.92738  | 4.79711  | L |      |     |    |    |
| O-O_2  | -1 | 2.80646  | 0.80463  | 4.78728  | H |      |     |    |    |
| O-O_2  | -1 | -7.42711 | 0.98081  | 4.83099  | L |      |     |    |    |
| Si-Si3 | -1 | -0.04401 | -1.93975 | 4.74181  | L | H-H_ | 204 | 0. | 0. |
| Si-Si3 | -1 | 7.01411  | -4.05197 | 5.66073  | L |      |     |    |    |
| Si-Si3 | -1 | 7.86615  | 0.87941  | 3.30238  | L |      |     |    |    |
| O-O_2  | -1 | 7.26127  | 2.19324  | 2.68417  | L |      |     |    |    |
| O-O_2  | -1 | 5.57355  | -3.47051 | 5.40137  | L |      |     |    |    |
| Si-Si3 | -1 | -7.18562 | -3.73878 | 5.68402  | L |      |     |    |    |
| Si-Si3 | -1 | -7.82649 | 1.22553  | 3.32812  | L |      |     |    |    |
| O-O_2  | -1 | -7.1663  | 2.51145  | 2.70783  | L |      |     |    |    |
| O-O_2  | -1 | -5.72168 | -3.22139 | 5.4199   | L |      |     |    |    |
| Si-Si3 | -1 | -4.36993 | 4.55752  | 4.47429  | L |      |     |    |    |
| Si-Si3 | -1 | -3.61688 | 1.89139  | 5.73459  | L |      |     |    |    |
| O-O_2  | -1 | -3.52426 | 3.33155  | 5.04775  | L |      |     |    |    |
| O-O_2  | -1 | -5.08082 | 1.374    | 5.99872  | L |      |     |    |    |
| Si-Si3 | -1 | 4.56299  | 4.36049  | 4.45964  | L |      |     |    |    |

|        |    |          |          |          |   |      |     |    |    |
|--------|----|----------|----------|----------|---|------|-----|----|----|
| Si-Si3 | -1 | 3.69769  | 1.72987  | 5.72299  | L | H-H_ | 177 | 0. | 0. |
| O-O_2  | -1 | 3.66597  | 3.17296  | 5.03596  | L |      |     |    |    |
| O-O_2  | -1 | 5.13847  | 1.1486   | 5.98196  | L |      |     |    |    |
| Si-Si3 | -1 | 6.64488  | 0.71826  | 6.16856  | L |      |     |    |    |
| Si-Si3 | -1 | -6.60412 | 1.01048  | 6.19029  | L |      |     |    |    |
| Si-Si3 | -1 | -4.19839 | -2.85787 | 5.22832  | L |      |     |    |    |
| Si-Si3 | -1 | -2.7531  | -0.48566 | 4.08129  | L | H-H_ | 128 | 0. | 0. |
| O-O_2  | -1 | -1.34428 | -1.13186 | 4.37185  | L |      |     |    |    |
| O-O_2  | -1 | -3.98868 | -1.40823 | 4.53555  | L |      |     |    |    |
| Si-Si3 | -1 | 4.06777  | -3.04026 | 5.21461  | L | H-H_ | 205 | 0. | 0. |
| Si-Si3 | 0  | 2.71569  | -0.62527 | 4.12593  | H |      |     |    |    |
| O-O_2  | -1 | 1.28914  | -1.19094 | 4.3662   | H |      |     |    |    |
| O-O_2  | -1 | 3.92     | -1.58224 | 4.523    | H |      |     |    |    |
| O-O_2  | -1 | 5.4632   | 3.86213  | 3.29869  | L |      |     |    |    |
| O-O_2  | -1 | -5.29438 | 4.0994   | 3.31633  | L |      |     |    |    |
| H-H_   | -1 | -7.38065 | -9.37065 | -2.73057 | L |      |     |    |    |
| H-H_   | -1 | -7.32574 | -7.21702 | 1.79259  | L |      |     |    |    |
| H-H_   | -1 | -7.27081 | -5.06338 | 6.31575  | L |      |     |    |    |
| H-H_   | -1 | -3.70283 | -8.58194 | -0.37613 | L |      |     |    |    |
| H-H_   | -1 | -3.64791 | -6.4283  | 4.14703  | L |      |     |    |    |
| H-H_   | -1 | 3.30132  | -8.73643 | -0.38762 | L |      |     |    |    |
| H-H_   | -1 | 3.35624  | -6.58279 | 4.13554  | L |      |     |    |    |
| H-H_   | -1 | 6.98857  | -7.53271 | 1.7691   | L |      |     |    |    |
| H-H_   | -1 | 7.04349  | -5.37908 | 6.29226  | L |      |     |    |    |
| H-H_   | -1 | 7.83899  | -3.19575 | 6.52524  | L |      |     |    |    |
| H-H_   | -1 | -9.32367 | -0.66511 | -1.30275 | L |      |     |    |    |
| H-H_   | -1 | -7.47517 | -3.32424 | -4.11328 | L |      |     |    |    |
| H-H_   | -1 | -9.47251 | -5.06663 | -1.97984 | L |      |     |    |    |
| H-H_   | -1 | -8.1039  | -8.14962 | -4.58564 | L |      |     |    |    |
| H-H_   | -1 | -7.83526 | 4.05011  | -4.84838 | L |      |     |    |    |
| H-H_   | -1 | -7.80987 | 5.04555  | -2.7577  | L |      |     |    |    |
| H-H_   | -1 | -5.35599 | -0.18397 | -5.66956 | L |      |     |    |    |
| H-H_   | -1 | -9.26875 | 1.48852  | 3.22041  | L |      |     |    |    |
| H-H_   | -1 | -9.41759 | -2.91299 | 2.54331  | L |      |     |    |    |
| H-H_   | -1 | -7.75495 | 7.19919  | 1.76546  | L |      |     |    |    |
| H-H_   | -1 | -7.78034 | 6.20374  | -0.32523 | L |      |     |    |    |
| H-H_   | -1 | -2.55552 | 10.87187 | -0.04028 | L |      |     |    |    |
| H-H_   | -1 | 6.93365  | -9.68635 | -2.75405 | L |      |     |    |    |
| H-H_   | -1 | 9.21573  | -5.47882 | -2.0105  | L |      |     |    |    |
| H-H_   | -1 | 9.27065  | -3.32518 | 2.51266  | L |      |     |    |    |
| H-H_   | -1 | 9.26331  | -1.07498 | -1.33328 | L |      |     |    |    |
| H-H_   | -1 | 9.31823  | 1.07866  | 3.18988  | L |      |     |    |    |
| H-H_   | -1 | 8.05271  | 6.85034  | 1.73934  | L |      |     |    |    |
| H-H_   | -1 | 8.02733  | 5.85511  | -0.35088 | L |      |     |    |    |

|        |    |          |          |          |   |
|--------|----|----------|----------|----------|---|
| H-H_   | -1 | 7.99779  | 4.69671  | -2.78382 | L |
| H-H_   | -1 | 7.97242  | 3.70148  | -4.87404 | L |
| H-H_   | -1 | -2.58102 | 9.87169  | -2.14089 | L |
| H-H_   | -1 | -2.61044 | 8.71823  | -4.56343 | L |
| H-H_   | -1 | -2.63594 | 7.71805  | -6.66404 | L |
| H-H_   | -1 | 2.93358  | 7.59522  | -6.67319 | L |
| H-H_   | -1 | 2.95909  | 8.5954   | -4.57256 | L |
| H-H_   | -1 | 2.9885   | 9.74885  | -2.15004 | L |
| H-H_   | -1 | 3.01401  | 10.74904 | -0.04941 | L |
| H-H_   | -1 | -7.34    | 1.97623  | 7.01897  | L |
| H-H_   | -1 | -5.22012 | 5.14394  | 5.52033  | L |
| H-H_   | -1 | -3.10956 | 8.21024  | 4.01909  | L |
| H-H_   | -1 | -2.80883 | 1.9953   | 6.95817  | L |
| H-H_   | -1 | 0.19063  | 8.77151  | 3.71329  | L |
| H-H_   | -1 | 2.89882  | 1.86939  | 6.94854  | L |
| H-H_   | -1 | 3.46398  | 8.06513  | 4.00823  | L |
| H-H_   | -1 | 5.44204  | 4.90863  | 5.50258  | L |
| H-H_   | -1 | 7.42534  | 1.65056  | 6.99475  | L |
| H-H_   | -1 | 3.32842  | 2.74946  | -7.15594 | L |
| H-H_   | -1 | 5.30618  | -0.41902 | -5.68678 | L |
| H-H_   | -1 | 7.29018  | -3.6499  | -4.1375  | L |
| H-H_   | -1 | 7.70377  | -8.49825 | -4.6113  | L |
| H-H_   | -1 | 2.66493  | -4.60457 | -6.41026 | L |
| H-H_   | -1 | 3.17749  | -8.27976 | -4.65774 | L |
| H-H_   | -1 | -0.18373 | -7.55527 | -4.97608 | L |
| H-H_   | -1 | -2.90458 | -4.48173 | -6.4011  | L |
| H-H_   | -1 | -3.57234 | -8.13089 | -4.64667 | L |
| H-H_   | -1 | -7.96868 | -2.8469  | 6.55136  | L |
| H-H_   | -1 | -6.79437 | -0.30469 | 6.8188   | L |
| H-H_   | -1 | -3.24512 | 2.89447  | -7.14531 | L |
| H-H_   | -1 | 0.05504  | 3.45457  | -7.45357 | L |
| H-H_   | -1 | -0.04828 | -2.24379 | 6.17931  | L |
| H-H_   | -1 | 3.31266  | -2.9793  | 6.47451  | L |
| H-H_   | -1 | 6.77845  | -0.60411 | 6.79657  | L |
| H-H_   | -1 | -3.43717 | -2.83043 | 6.48558  | L |
| Al-Al3 | 0  | 3.56302  | -0.42576 | 1.13536  | H |
| H-H_   | 0  | 0.91622  | 0.42807  | 0.31433  | H |
| C-C_3  | 0  | 0.417    | 0.32422  | 1.27751  | H |
| C-C_3  | 0  | 1.27652  | 0.87064  | 2.40547  | H |
| H-H_   | 0  | -0.52025 | 0.88544  | 1.26388  | H |
| H-H_   | 0  | 0.17464  | -0.72786 | 1.4287   | H |
| H-H_   | 0  | 0.73366  | 0.76381  | 3.34275  | H |
| C-C_3  | 0  | 1.60428  | 2.3595   | 2.24049  | H |
| C-C_3  | 0  | 0.45523  | 3.22613  | 2.77108  | H |

|      |   |          |         |         |   |
|------|---|----------|---------|---------|---|
| H-H_ | 0 | 1.79909  | 2.57465 | 1.19177 | H |
| H-H_ | 0 | 2.52428  | 2.59153 | 2.77912 | H |
| H-H_ | 0 | 0.64868  | 4.27911 | 2.55242 | H |
| H-H_ | 0 | -0.50104 | 2.97243 | 2.30149 | H |
| H-H_ | 0 | 0.33038  | 3.12229 | 3.85562 | H |

**S3. The coordinates for INT2 on HZSM-23**

|        |    |          |         |          |   |      |     |    |    |
|--------|----|----------|---------|----------|---|------|-----|----|----|
| O-O_2  | -1 | 3.29007  | 3.95874 | -4.95187 | L |      |     |    |    |
| O-O_2  | -1 | -3.33808 | 3.90375 | -4.95837 | L |      |     |    |    |
| Si-Si3 | -1 | -0.01685 | 3.17755 | -5.98797 | L |      |     |    |    |
| Si-Si3 | -1 | -2.92423 | 2.59327 | -5.7257  | L |      |     |    |    |
| O-O_2  | -1 | -3.5467  | 1.28608 | -5.11008 | L |      |     |    |    |
| O-O_2  | -1 | -1.32507 | 2.3509  | -5.60314 | L |      |     |    |    |
| Si-Si3 | -1 | 2.89888  | 2.64158 | -5.71999 | L |      |     |    |    |
| O-O_2  | -1 | 3.54174  | 1.3449  | -5.10313 | L |      |     |    |    |
| O-O_2  | -1 | 1.30437  | 2.37271 | -5.60057 | L |      |     |    |    |
| O-O_2  | -1 | -0.02908 | 4.56604 | -5.25836 | L |      |     |    |    |
| O-O_2  | -1 | -3.34916 | 4.97235 | -2.70052 | L |      |     |    |    |
| O-O_2  | -1 | 3.26782  | 6.10194 | -0.42344 | L | H-H_ | 28  | 0. | 0. |
| O-O_2  | -1 | 3.279    | 5.02741 | -2.69401 | L | H-H_ | 28  | 0. | 0. |
| O-O_2  | -1 | -3.3603  | 6.04696 | -0.42999 | L |      |     |    |    |
| Si-Si3 | -1 | -0.03907 | 5.32077 | -1.45959 | L |      |     |    |    |
| Si-Si3 | -1 | -0.0414  | 5.96545 | -4.53614 | L |      |     |    |    |
| Si-Si3 | -1 | 6.28701  | 1.40849 | -2.34827 | L | H-H_ | 169 | 0. | 0. |
| Si-Si3 | -1 | 7.07507  | 4.06664 | -3.60254 | L |      |     |    |    |
| O-O_2  | -1 | 7.149    | 2.62369 | -2.91924 | L |      |     |    |    |
| O-O_2  | -1 | 5.61821  | 4.60506 | -3.86451 | L |      |     |    |    |
| Si-Si3 | -1 | -6.29731 | 1.30397 | -2.36063 | L |      |     |    |    |
| Si-Si3 | -1 | -7.12763 | 3.9488  | -3.61646 | L |      |     |    |    |
| O-O_2  | -1 | -7.1783  | 2.50482 | -2.93329 | L |      |     |    |    |
| O-O_2  | -1 | -5.6794  | 4.51133 | -3.87559 | L |      |     |    |    |
| Si-Si3 | -1 | -2.94645 | 4.73648 | -1.19732 | L |      |     |    |    |
| O-O_2  | -1 | -3.56892 | 3.4293  | -0.5817  | L |      |     |    |    |
| O-O_2  | -1 | -1.34729 | 4.49412 | -1.07476 | L |      |     |    |    |
| Si-Si3 | -1 | 2.87671  | 4.78476 | -1.19183 | H |      |     |    |    |
| O-O_2  | -1 | 3.51938  | 3.48793 | -0.57413 | H |      |     |    |    |
| O-O_2  | -1 | 1.28217  | 4.51581 | -1.0723  | L | H-H_ | 28  | 0. | 0. |
| Si-Si3 | -1 | -4.16734 | 4.92105 | -4.06209 | L |      |     |    |    |
| Si-Si3 | -1 | -2.79174 | 7.33912 | -5.19977 | L |      |     |    |    |
| O-O_2  | -1 | -1.36471 | 6.73526 | -4.90697 | L |      |     |    |    |
| O-O_2  | -1 | -3.99992 | 6.37839 | -4.751   | L |      |     |    |    |
| Si-Si3 | -1 | 4.10057  | 4.98965 | -4.05398 | L |      |     |    |    |
| Si-Si3 | -1 | 2.68728  | 7.38458 | -5.1944  | L |      |     |    |    |
| O-O_2  | -1 | 1.26925  | 6.75711 | -4.90439 | L |      |     |    |    |

|        |    |          |          |          |   |      |     |    |    |
|--------|----|----------|----------|----------|---|------|-----|----|----|
| O-O_2  | -1 | 3.91035  | 6.44402  | -4.74324 | L |      |     |    |    |
| O-O_2  | -1 | -0.04019 | 5.6368   | -2.99598 | L |      |     |    |    |
| O-O_2  | -1 | -0.05131 | 6.70926  | -0.72998 | L |      |     |    |    |
| O-O_2  | -1 | -3.37138 | 7.11557  | 1.82786  | L |      |     |    |    |
| O-O_2  | -1 | 3.25676  | 7.17056  | 1.83436  | L |      |     |    |    |
| Si-Si3 | -1 | -0.06129 | 7.46399  | 3.0688   | L |      |     |    |    |
| Si-Si3 | -1 | -0.06362 | 8.10867  | -0.00776 | L |      |     |    |    |
| Si-Si3 | -1 | 6.26473  | 3.55174  | 2.18     | L | H-H_ | 172 | 0. | 0. |
| Si-Si3 | -1 | 7.05285  | 6.20986  | 0.92585  | L |      |     |    |    |
| O-O_2  | -1 | 7.12677  | 4.7669   | 1.60914  | L |      |     |    |    |
| O-O_2  | -1 | 5.59599  | 6.74828  | 0.66387  | L |      |     |    |    |
| Si-Si3 | -1 | -6.31954 | 3.44719  | 2.16775  | L |      |     |    |    |
| Si-Si3 | -1 | -7.14986 | 6.09202  | 0.91192  | L |      |     |    |    |
| O-O_2  | -1 | -7.20053 | 4.64803  | 1.59509  | L |      |     |    |    |
| O-O_2  | -1 | -5.70162 | 6.65454  | 0.65279  | L |      |     |    |    |
| Si-Si3 | -1 | -2.96867 | 6.8797   | 3.33106  | L |      |     |    |    |
| O-O_2  | -1 | -3.59114 | 5.57252  | 3.94668  | L |      |     |    |    |
| O-O_2  | -1 | -1.36951 | 6.63733  | 3.45362  | L |      |     |    |    |
| Si-Si3 | -1 | 2.85443  | 6.92801  | 3.33677  | L |      |     |    |    |
| O-O_2  | -1 | 3.4973   | 5.63133  | 3.95363  | L |      |     |    |    |
| O-O_2  | -1 | 1.25992  | 6.65915  | 3.4562   | L |      |     |    |    |
| Si-Si3 | -1 | -4.18956 | 7.06427  | 0.46629  | L |      |     |    |    |
| Si-Si3 | -1 | -2.81396 | 9.48234  | -0.67139 | L |      |     |    |    |
| O-O_2  | -1 | -1.38693 | 8.87848  | -0.37859 | L |      |     |    |    |
| O-O_2  | -1 | -4.02214 | 8.5216   | -0.22262 | L |      |     |    |    |
| Si-Si3 | -1 | 4.07835  | 7.13287  | 0.4744   | L |      |     |    |    |
| Si-Si3 | -1 | 2.66505  | 9.52779  | -0.66602 | L |      |     |    |    |
| O-O_2  | -1 | 1.24702  | 8.90033  | -0.37601 | L |      |     |    |    |
| O-O_2  | -1 | 3.88812  | 8.58723  | -0.21486 | L |      |     |    |    |
| O-O_2  | -1 | -0.06241 | 7.78001  | 1.5324   | L |      |     |    |    |
| O-O_2  | -1 | 8.03693  | -7.18579 | -2.42934 | L |      |     |    |    |
| O-O_2  | -1 | -7.91543 | -6.24601 | -0.17987 | L |      |     |    |    |
| O-O_2  | -1 | -7.42009 | -2.47329 | -1.968   | L |      |     |    |    |
| O-O_2  | -1 | -2.75283 | -3.45437 | -4.24831 | L |      |     |    |    |
| O-O_2  | -1 | -3.24814 | -7.23051 | -2.46743 | L |      |     |    |    |
| O-O_2  | 0  | 2.81459  | -2.33589 | -1.97845 | H |      |     |    |    |
| O-O_2  | -1 | 3.36893  | -6.10098 | -0.19039 | L |      |     |    |    |
| O-O_2  | -1 | 2.82496  | -3.40809 | -4.24284 | L |      |     |    |    |
| O-O_2  | -1 | 3.38     | -7.17552 | -2.46093 | L |      |     |    |    |
| O-O_2  | -1 | -2.76395 | -2.38333 | -1.98509 | H |      |     |    |    |
| O-O_2  | -1 | -3.25929 | -6.15591 | -0.1969  | L |      |     |    |    |
| O-O_2  | -1 | -7.90431 | -7.31805 | -2.44497 | L |      |     |    |    |
| O-O_2  | -1 | 8.02581  | -6.11375 | -0.16424 | L |      |     |    |    |
| O-O_2  | -1 | 7.47145  | -2.34974 | -1.9534  | L |      |     |    |    |



|        |    |          |          |          |   |      |     |    |    |
|--------|----|----------|----------|----------|---|------|-----|----|----|
| Si-Si3 | -1 | 0.06183  | -6.88213 | -1.22644 | L | H-H_ | 117 | 0. | 0. |
| Si-Si3 | -1 | 0.05961  | -6.23742 | -4.30305 | L |      |     |    |    |
| Si-Si3 | -1 | 7.17609  | -8.13623 | -3.36944 | L |      |     |    |    |
| O-O_2  | -1 | 5.71923  | -7.59811 | -3.63127 | L |      |     |    |    |
| Si-Si3 | -1 | -7.02662 | -8.25406 | -3.38337 | L |      |     |    |    |
| O-O_2  | -1 | -5.57838 | -7.69184 | -3.64235 | L |      |     |    |    |
| Si-Si3 | -1 | -4.46085 | 0.12678  | -4.56589 | L |      |     |    |    |
| Si-Si3 | -1 | -3.63061 | -2.51824 | -3.30987 | L | H-H_ | 77  | 0. | 0. |
| Si-Si3 | -1 | -2.84543 | -7.46669 | -0.96408 | L |      |     |    |    |
| O-O_2  | -1 | -3.57986 | -1.07436 | -3.99308 | L |      |     |    |    |
| O-O_2  | -1 | -5.07877 | -3.08057 | -3.05093 | L |      |     |    |    |
| O-O_2  | -1 | -1.24628 | -7.70875 | -0.84167 | L |      |     |    |    |
| Si-Si3 | -1 | 4.47394  | 0.20091  | -4.55713 | L |      |     |    |    |
| Si-Si3 | -1 | 3.6853   | -2.45842 | -3.303   | L | H-H_ | 73  | 0. | 0. |
| Si-Si3 | -1 | 2.97767  | -7.41838 | -0.95837 | L |      |     |    |    |
| O-O_2  | -1 | 3.61187  | -1.0147  | -3.98603 | L |      |     |    |    |
| O-O_2  | -1 | 5.14266  | -2.99577 | -3.0409  | L |      |     |    |    |
| O-O_2  | -1 | 1.38316  | -7.68694 | -0.83909 | L |      |     |    |    |
| Si-Si3 | -1 | 6.66094  | -3.38066 | -2.85129 | L |      |     |    |    |
| Si-Si3 | -1 | 8.07424  | -5.77528 | -1.71101 | L |      |     |    |    |
| O-O_2  | -1 | 6.85052  | -4.83472 | -2.16217 | L |      |     |    |    |
| Si-Si3 | -1 | -6.59083 | -3.4906  | -2.86429 | L |      |     |    |    |
| Si-Si3 | -1 | -7.96643 | -5.90836 | -1.72675 | L |      |     |    |    |
| O-O_2  | -1 | -6.75825 | -4.94763 | -2.17552 | L |      |     |    |    |
| Si-Si3 | -1 | -4.06632 | -7.28181 | -3.829   | L |      |     |    |    |
| Si-Si3 | -1 | -2.69072 | -4.86405 | -4.96654 | L |      |     |    |    |
| O-O_2  | -1 | -1.26369 | -5.46791 | -4.67374 | L |      |     |    |    |
| O-O_2  | -1 | -3.8989  | -5.82478 | -4.51777 | L |      |     |    |    |
| Si-Si3 | -1 | 4.20159  | -7.21321 | -3.82089 | L |      |     |    |    |
| Si-Si3 | -1 | 2.7883   | -4.81859 | -4.96116 | L |      |     |    |    |
| O-O_2  | -1 | 1.37026  | -5.44605 | -4.67115 | L |      |     |    |    |
| O-O_2  | -1 | 4.01136  | -5.75915 | -4.51001 | L |      |     |    |    |
| O-O_2  | -1 | -5.37908 | 0.71528  | -3.46321 | L |      |     |    |    |
| O-O_2  | -1 | 5.38076  | 0.80455  | -3.45266 | L |      |     |    |    |
| O-O_2  | -1 | 0.06083  | -6.56595 | -2.76184 | L |      |     |    |    |
| O-O_2  | -1 | 0.0499   | -5.49376 | -0.49673 | H |      |     |    |    |
| O-O_2  | -1 | 8.01471  | -5.043   | 2.09814  | L |      |     |    |    |
| O-O_2  | -1 | 7.46032  | -1.27516 | 0.31714  | L |      |     |    |    |
| O-O_2  | -1 | -7.93765 | -4.1028  | 4.34851  | L |      |     |    |    |
| O-O_2  | -1 | -7.44231 | -0.33007 | 2.56038  | L |      |     |    |    |
| O-O_2  | -1 | -2.7752  | -1.31074 | 0.28083  | H |      |     |    |    |
| O-O_2  | -1 | -3.27036 | -5.0873  | 2.06095  | L |      |     |    |    |
| O-O_2  | 0  | 2.60369  | -0.19841 | 2.58583  | H |      |     |    |    |
| O-O_2  | -1 | 3.34664  | -3.9577  | 4.33798  | L |      |     |    |    |

|        |    |          |          |          |   |      |     |    |    |
|--------|----|----------|----------|----------|---|------|-----|----|----|
| O-O_3  | 0  | 2.56865  | -1.27566 | 0.2572   | H |      |     |    |    |
| O-O_2  | -1 | 3.35781  | -5.03242 | 2.06747  | L |      |     |    |    |
| O-O_2  | -1 | -2.78598 | -0.23993 | 2.5433   | H |      |     |    |    |
| O-O_2  | -1 | -3.28151 | -4.01269 | 4.33148  | L |      |     |    |    |
| O-O_2  | -1 | -7.92653 | -5.17526 | 2.08251  | L |      |     |    |    |
| O-O_2  | -1 | -7.43123 | -1.39868 | 0.30253  | L |      |     |    |    |
| O-O_2  | -1 | 8.00359  | -3.97053 | 4.36414  | L |      |     |    |    |
| O-O_2  | -1 | 7.44923  | -0.20655 | 2.575    | L |      |     |    |    |
| Si-Si3 | -1 | 0.0397   | -4.73893 | 3.30188  | L | H-H_ | 173 | 0. | 0. |
| Si-Si3 | -1 | 0.03819  | -4.13602 | 0.24131  | H |      |     |    |    |
| Si-Si3 | -1 | 7.15386  | -5.99301 | 1.15894  | L |      |     |    |    |
| Si-Si3 | -1 | 7.86199  | -1.03229 | -1.18542 | L |      |     |    |    |
| O-O_2  | -1 | 7.21913  | 0.2641   | -1.80214 | L |      |     |    |    |
| O-O_2  | -1 | 5.69701  | -5.45492 | 0.89705  | L |      |     |    |    |
| Si-Si3 | -1 | -7.04884 | -6.11085 | 1.14501  | L |      |     |    |    |
| Si-Si3 | -1 | -7.83394 | -1.16251 | -1.20082 | L |      |     |    |    |
| O-O_2  | -1 | -7.21147 | 0.14437  | -1.81629 | L |      |     |    |    |
| O-O_2  | -1 | -5.6006  | -5.54863 | 0.88603  | L |      |     |    |    |
| Si-Si3 | -1 | -4.48308 | 2.27     | -0.03751 | L |      |     |    |    |
| Si-Si3 | -1 | -3.65278 | -0.37518 | 1.21837  | H |      |     |    |    |
| Si-Si3 | -1 | -2.86766 | -5.32347 | 3.5643   | L |      |     |    |    |
| O-O_2  | -1 | -3.60206 | 1.06885  | 0.53529  | L | H-H_ | 145 | 0. | 0. |
| O-O_2  | -1 | -5.10098 | -0.9373  | 1.4776   | L | H-H_ | 145 | 0. | 0. |
| O-O_2  | -1 | -1.2685  | -5.56554 | 3.68671  | L |      |     |    |    |
| Si-Si3 | 0  | 4.43804  | 2.32388  | -0.02118 | H |      |     |    |    |
| Si-Si3 | -1 | 2.95545  | -5.27516 | 3.57001  | L |      |     |    |    |
| O-O_2  | 0  | 3.36782  | 1.23844  | 0.38819  | H |      |     |    |    |
| O-O_2  | 0  | 5.11098  | -0.87524 | 1.42283  | H |      |     |    |    |
| O-O_2  | -1 | 1.36094  | -5.54372 | 3.68929  | L |      |     |    |    |
| Si-Si3 | -1 | 6.63866  | -1.23735 | 1.67701  | L | H-H_ | 153 | 0. | 0. |
| Si-Si3 | -1 | 8.05201  | -3.63206 | 2.81737  | L |      |     |    |    |
| O-O_2  | -1 | 6.8283   | -2.69151 | 2.36621  | L |      |     |    |    |
| Si-Si3 | -1 | -6.61305 | -1.34739 | 1.66409  | L |      |     |    |    |
| Si-Si3 | -1 | -7.98865 | -3.76515 | 2.80164  | L |      |     |    |    |
| O-O_2  | -1 | -6.78048 | -2.80441 | 2.35286  | L |      |     |    |    |
| Si-Si3 | -1 | -4.08854 | -5.1386  | 0.69939  | L |      |     |    |    |
| Si-Si3 | -1 | -2.71273 | -2.72106 | -0.43807 | H |      |     |    |    |
| O-O_2  | -1 | -1.25742 | -3.30884 | -0.14187 | H |      |     |    |    |
| O-O_2  | -1 | -3.92115 | -3.68151 | 0.01065  | L | H-H_ | 162 | 0. | 0. |
| Si-Si3 | -1 | 4.1791   | -5.06956 | 0.70737  | L | H-H_ | 168 | 0. | 0. |
| Si-Si3 | 0  | 2.81309  | -2.74551 | -0.46212 | H |      |     |    |    |
| O-O_2  | 0  | 1.43555  | -3.4608  | -0.14664 | H |      |     |    |    |
| O-O_2  | 0  | 4.12449  | -3.54639 | 0.01927  | H |      |     |    |    |
| O-O_2  | -1 | 5.36934  | 1.87611  | -1.1884  | H |      |     |    |    |

|        |    |          |          |          |   |      |     |    |    |
|--------|----|----------|----------|----------|---|------|-----|----|----|
| O-O_2  | -1 | -5.4013  | 2.85849  | 1.06517  | L |      |     |    |    |
| O-O_2  | -1 | -5.39019 | 1.78689  | -1.19902 | L |      |     |    |    |
| O-O_2  | -1 | 5.35853  | 2.94728  | 1.07564  | H |      |     |    |    |
| O-O_2  | -1 | 0.03855  | -4.42299 | 1.76522  | H |      |     |    |    |
| O-O_2  | -1 | 0.02749  | -3.35069 | 4.03164  | L |      |     |    |    |
| O-O_2  | -1 | 7.43809  | 0.86809  | 4.84551  | L |      |     |    |    |
| O-O_2  | -1 | -2.79729 | 0.8325   | 4.80936  | L |      |     |    |    |
| O-O_2  | -1 | 2.78082  | 0.87902  | 4.81414  | H |      |     |    |    |
| O-O_2  | -1 | -7.45345 | 0.74453  | 4.83091  | L |      |     |    |    |
| Si-Si3 | -1 | 0.01509  | -1.95048 | 4.7545   | L | H-H_ | 204 | 0. | 0. |
| Si-Si3 | -1 | 7.13164  | -3.84979 | 5.68732  | L |      |     |    |    |
| Si-Si3 | -1 | 7.83977  | 1.11093  | 3.34296  | L |      |     |    |    |
| O-O_2  | -1 | 7.19691  | 2.40731  | 2.72624  | L |      |     |    |    |
| O-O_2  | -1 | 5.67478  | -3.31168 | 5.42549  | L |      |     |    |    |
| Si-Si3 | -1 | -7.07106 | -3.96763 | 5.67339  | L |      |     |    |    |
| Si-Si3 | -1 | -7.85616 | 0.98071  | 3.32756  | L |      |     |    |    |
| O-O_2  | -1 | -7.23369 | 2.28759  | 2.71209  | L |      |     |    |    |
| O-O_2  | -1 | -5.62282 | -3.40541 | 5.41441  | L |      |     |    |    |
| Si-Si3 | -1 | -4.5053  | 4.41322  | 4.49087  | L |      |     |    |    |
| Si-Si3 | -1 | -3.67497 | 1.76808  | 5.74685  | L |      |     |    |    |
| O-O_2  | -1 | -3.62431 | 3.21207  | 5.06368  | L |      |     |    |    |
| O-O_2  | -1 | -5.12321 | 1.20586  | 6.00583  | L |      |     |    |    |
| Si-Si3 | -1 | 4.42949  | 4.48735  | 4.49963  | L |      |     |    |    |
| Si-Si3 | -1 | 3.64114  | 1.8286   | 5.75441  | L | H-H_ | 177 | 0. | 0. |
| O-O_2  | -1 | 3.56743  | 3.27174  | 5.07073  | L |      |     |    |    |
| O-O_2  | -1 | 5.09821  | 1.29067  | 6.01586  | L |      |     |    |    |
| Si-Si3 | -1 | 6.6165   | 0.90578  | 6.20547  | L |      |     |    |    |
| Si-Si3 | -1 | -6.63527 | 0.79583  | 6.19247  | L |      |     |    |    |
| Si-Si3 | -1 | -4.11077 | -2.99538 | 5.22776  | L |      |     |    |    |
| Si-Si3 | -1 | -2.73516 | -0.5776  | 4.09023  | L | H-H_ | 128 | 0. | 0. |
| O-O_2  | -1 | -1.30814 | -1.18147 | 4.38302  | L |      |     |    |    |
| O-O_2  | -1 | -3.94334 | -1.53835 | 4.539    | L |      |     |    |    |
| Si-Si3 | -1 | 4.15713  | -2.92685 | 5.23574  | L | H-H_ | 205 | 0. | 0. |
| Si-Si3 | 0  | 2.73348  | -0.54653 | 4.11672  | H |      |     |    |    |
| O-O_2  | -1 | 1.32586  | -1.16056 | 4.38434  | H |      |     |    |    |
| O-O_2  | -1 | 3.96698  | -1.47232 | 4.54715  | H |      |     |    |    |
| O-O_2  | -1 | 5.34742  | 4.01937  | 3.33991  | L |      |     |    |    |
| O-O_2  | -1 | -5.41242 | 3.9301   | 3.32936  | L |      |     |    |    |
| H-H_   | -1 | -7.07322 | -9.58218 | -2.75502 | L |      |     |    |    |
| H-H_   | -1 | -7.09545 | -7.43897 | 1.77336  | L |      |     |    |    |
| H-H_   | -1 | -7.11767 | -5.29575 | 6.30174  | L |      |     |    |    |
| H-H_   | -1 | -3.42716 | -8.68802 | -0.3889  | L |      |     |    |    |
| H-H_   | -1 | -3.44938 | -6.54481 | 4.13948  | L |      |     |    |    |
| H-H_   | -1 | 3.57846  | -8.6299  | -0.38203 | L |      |     |    |    |

|      |    |          |          |          |   |
|------|----|----------|----------|----------|---|
| H-H_ | -1 | 3.55623  | -6.48668 | 4.14635  | L |
| H-H_ | -1 | 7.22186  | -7.32016 | 1.78739  | L |
| H-H_ | -1 | 7.19963  | -5.17694 | 6.31577  | L |
| H-H_ | -1 | 7.9279   | -2.97106 | 6.55605  | L |
| H-H_ | -1 | -9.28323 | -0.94313 | -1.31176 | L |
| H-H_ | -1 | -7.34758 | -3.53805 | -4.12364 | L |
| H-H_ | -1 | -9.29667 | -5.34546 | -1.99969 | L |
| H-H_ | -1 | -7.82837 | -8.37912 | -4.60912 | L |
| H-H_ | -1 | -7.92938 | 3.82375  | -4.84222 | L |
| H-H_ | -1 | -7.93965 | 4.81439  | -2.74911 | L |
| H-H_ | -1 | -5.32064 | -0.33112 | -5.6668  | L |
| H-H_ | -1 | -9.30546 | 1.20009  | 3.21662  | L |
| H-H_ | -1 | -9.31889 | -3.20225 | 2.52869  | L |
| H-H_ | -1 | -7.96188 | 6.9576   | 1.77927  | L |
| H-H_ | -1 | -7.9516  | 5.96697  | -0.31383 | L |
| H-H_ | -1 | -2.87161 | 10.79076 | -0.00385 | L |
| H-H_ | -1 | 7.24408  | -9.46338 | -2.74099 | L |
| H-H_ | -1 | 9.39549  | -5.19038 | -1.98136 | L |
| H-H_ | -1 | 9.37327  | -3.04716 | 2.54702  | L |
| H-H_ | -1 | 9.30764  | -0.7888  | -1.29357 | L |
| H-H_ | -1 | 9.28542  | 1.35442  | 3.23481  | L |
| H-H_ | -1 | 7.84911  | 7.08859  | 1.79458  | L |
| H-H_ | -1 | 7.85938  | 6.09818  | -0.29806 | L |
| H-H_ | -1 | 7.87133  | 4.94538  | -2.7338  | L |
| H-H_ | -1 | 7.8816   | 3.95496  | -4.82644 | L |
| H-H_ | -1 | -2.86129 | 9.79542  | -2.10689 | L |
| H-H_ | -1 | -2.84939 | 8.64754  | -4.53223 | L |
| H-H_ | -1 | -2.83907 | 7.6522   | -6.63527 | L |
| H-H_ | -1 | 2.73162  | 7.69843  | -6.62982 | L |
| H-H_ | -1 | 2.7213   | 8.69378  | -4.52676 | L |
| H-H_ | -1 | 2.7094   | 9.84164  | -2.10144 | L |
| H-H_ | -1 | 2.69908  | 10.83699 | 0.00162  | L |
| H-H_ | -1 | -7.40228 | 1.73677  | 7.02147  | L |
| H-H_ | -1 | -5.37562 | 4.97101  | 5.53601  | L |
| H-H_ | -1 | -3.35518 | 8.1036   | 4.0477   | L |
| H-H_ | -1 | -2.87363 | 1.89347  | 6.97283  | L |
| H-H_ | -1 | -0.07276 | 8.76549  | 3.75205  | L |
| H-H_ | -1 | 2.83522  | 1.94081  | 6.97816  | L |
| H-H_ | -1 | 3.21974  | 8.15803  | 4.05407  | L |
| H-H_ | -1 | 5.28878  | 5.05935  | 5.54622  | L |
| H-H_ | -1 | 7.36616  | 1.8593   | 7.03595  | L |
| H-H_ | -1 | 3.27459  | 2.86808  | -7.123   | L |
| H-H_ | -1 | 5.34376  | -0.24253 | -5.65607 | L |
| H-H_ | -1 | 7.42085  | -3.41552 | -4.10916 | L |

|        |    |          |          |          |   |
|--------|----|----------|----------|----------|---|
| H-H_   | -1 | 7.98262  | -8.24791 | -4.59334 | L |
| H-H_   | -1 | 2.83263  | -4.5045  | -6.39653 | L |
| H-H_   | -1 | 3.45193  | -8.16674 | -4.65137 | L |
| H-H_   | -1 | 0.07111  | -7.54378 | -4.97697 | L |
| H-H_   | -1 | -2.73804 | -4.55073 | -6.40198 | L |
| H-H_   | -1 | -3.29932 | -8.22275 | -4.65799 | L |
| H-H_   | -1 | -7.88308 | -3.10205 | 6.54074  | L |
| H-H_   | -1 | -6.78717 | -0.52604 | 6.81735  | L |
| H-H_   | -1 | -3.30033 | 2.81355  | -7.1296  | L |
| H-H_   | -1 | -0.0179  | 3.47427  | -7.42771 | L |
| H-H_   | -1 | 0.01631  | -2.258   | 6.1913   | L |
| H-H_   | -1 | 3.39724  | -2.89192 | 6.49374  | L |
| H-H_   | -1 | 6.7885   | -0.41347 | 6.83069  | L |
| H-H_   | -1 | -3.35401 | -2.94793 | 6.48712  | L |
| Al-Al3 | 0  | 3.60354  | -0.17269 | 1.26305  | H |
| H-H_   | 0  | 0.82754  | -0.03611 | -0.05714 | H |
| C-C_3  | 0  | 0.29723  | 0.87439  | 0.22061  | H |
| C-C_3  | 0  | 0.24065  | 1.05393  | 1.74176  | H |
| H-H_   | 0  | 0.80163  | 1.71956  | -0.2571  | H |
| H-H_   | 0  | -0.72053 | 0.80628  | -0.17624 | H |
| C-C_3  | 0  | 1.57257  | 1.26776  | 2.45241  | H |
| C-C_3  | 0  | -0.5837  | 2.3131   | 2.09976  | H |
| H-H_   | 0  | 2.17331  | 2.02098  | 1.95262  | H |
| H-H_   | 0  | 1.38521  | 1.56696  | 3.47502  | H |
| H-H_   | 0  | -0.08483 | 3.22334  | 1.74402  | H |
| H-H_   | 0  | -1.56455 | 2.27241  | 1.62572  | H |
| H-H_   | 0  | -0.74076 | 2.41374  | 3.17994  | H |
| H-H_   | 0  | -0.25936 | 0.18576  | 2.18155  | H |

#### S4. The coordinates for the adsorption of isobutene on HZSM-23

|        |    |          |         |          |   |      |    |    |    |
|--------|----|----------|---------|----------|---|------|----|----|----|
| O-O_2  | -1 | 3.29007  | 3.95874 | -4.95187 | L |      |    |    |    |
| O-O_2  | -1 | -3.33808 | 3.90375 | -4.95837 | L |      |    |    |    |
| Si-Si3 | -1 | -0.01685 | 3.17755 | -5.98797 | L |      |    |    |    |
| Si-Si3 | -1 | -2.92423 | 2.59327 | -5.7257  | L |      |    |    |    |
| O-O_2  | -1 | -3.5467  | 1.28608 | -5.11008 | L |      |    |    |    |
| O-O_2  | -1 | -1.32507 | 2.3509  | -5.60314 | L |      |    |    |    |
| Si-Si3 | -1 | 2.89888  | 2.64158 | -5.71999 | L |      |    |    |    |
| O-O_2  | -1 | 3.54174  | 1.3449  | -5.10313 | L |      |    |    |    |
| O-O_2  | -1 | 1.30437  | 2.37271 | -5.60057 | L |      |    |    |    |
| O-O_2  | -1 | -0.02908 | 4.56604 | -5.25836 | L |      |    |    |    |
| O-O_2  | -1 | -3.34916 | 4.97235 | -2.70052 | L |      |    |    |    |
| O-O_2  | -1 | 3.26782  | 6.10194 | -0.42344 | L | H-H_ | 28 | 0. | 0. |
| O-O_2  | -1 | 3.279    | 5.02741 | -2.69401 | L | H-H_ | 28 | 0. | 0. |
| O-O_2  | -1 | -3.3603  | 6.04696 | -0.42999 | L |      |    |    |    |

|        |    |          |         |          |   |      |     |    |    |
|--------|----|----------|---------|----------|---|------|-----|----|----|
| Si-Si3 | -1 | -0.03907 | 5.32077 | -1.45959 | L |      |     |    |    |
| Si-Si3 | -1 | -0.0414  | 5.96545 | -4.53614 | L |      |     |    |    |
| Si-Si3 | -1 | 6.28701  | 1.40849 | -2.34827 | L | H-H_ | 169 | 0. | 0. |
| Si-Si3 | -1 | 7.07507  | 4.06664 | -3.60254 | L |      |     |    |    |
| O-O_2  | -1 | 7.149    | 2.62369 | -2.91924 | L |      |     |    |    |
| O-O_2  | -1 | 5.61821  | 4.60506 | -3.86451 | L |      |     |    |    |
| Si-Si3 | -1 | -6.29731 | 1.30397 | -2.36063 | L |      |     |    |    |
| Si-Si3 | -1 | -7.12763 | 3.9488  | -3.61646 | L |      |     |    |    |
| O-O_2  | -1 | -7.1783  | 2.50482 | -2.93329 | L |      |     |    |    |
| O-O_2  | -1 | -5.6794  | 4.51133 | -3.87559 | L |      |     |    |    |
| Si-Si3 | -1 | -2.94645 | 4.73648 | -1.19732 | L |      |     |    |    |
| O-O_2  | -1 | -3.56892 | 3.4293  | -0.5817  | L |      |     |    |    |
| O-O_2  | -1 | -1.34729 | 4.49412 | -1.07476 | L |      |     |    |    |
| Si-Si3 | -1 | 2.87671  | 4.78476 | -1.19183 | H |      |     |    |    |
| O-O_2  | -1 | 3.51938  | 3.48793 | -0.57413 | H |      |     |    |    |
| O-O_2  | -1 | 1.28217  | 4.51581 | -1.0723  | L | H-H_ | 28  | 0. | 0. |
| Si-Si3 | -1 | -4.16734 | 4.92105 | -4.06209 | L |      |     |    |    |
| Si-Si3 | -1 | -2.79174 | 7.33912 | -5.19977 | L |      |     |    |    |
| O-O_2  | -1 | -1.36471 | 6.73526 | -4.90697 | L |      |     |    |    |
| O-O_2  | -1 | -3.99992 | 6.37839 | -4.751   | L |      |     |    |    |
| Si-Si3 | -1 | 4.10057  | 4.98965 | -4.05398 | L |      |     |    |    |
| Si-Si3 | -1 | 2.68728  | 7.38458 | -5.1944  | L |      |     |    |    |
| O-O_2  | -1 | 1.26925  | 6.75711 | -4.90439 | L |      |     |    |    |
| O-O_2  | -1 | 3.91035  | 6.44402 | -4.74324 | L |      |     |    |    |
| O-O_2  | -1 | -0.04019 | 5.6368  | -2.99598 | L |      |     |    |    |
| O-O_2  | -1 | -0.05131 | 6.70926 | -0.72998 | L |      |     |    |    |
| O-O_2  | -1 | -3.37138 | 7.11557 | 1.82786  | L |      |     |    |    |
| O-O_2  | -1 | 3.25676  | 7.17056 | 1.83436  | L |      |     |    |    |
| Si-Si3 | -1 | -0.06129 | 7.46399 | 3.0688   | L |      |     |    |    |
| Si-Si3 | -1 | -0.06362 | 8.10867 | -0.00776 | L |      |     |    |    |
| Si-Si3 | -1 | 6.26473  | 3.55174 | 2.18     | L | H-H_ | 172 | 0. | 0. |
| Si-Si3 | -1 | 7.05285  | 6.20986 | 0.92585  | L |      |     |    |    |
| O-O_2  | -1 | 7.12677  | 4.7669  | 1.60914  | L |      |     |    |    |
| O-O_2  | -1 | 5.59599  | 6.74828 | 0.66387  | L |      |     |    |    |
| Si-Si3 | -1 | -6.31954 | 3.44719 | 2.16775  | L |      |     |    |    |
| Si-Si3 | -1 | -7.14986 | 6.09202 | 0.91192  | L |      |     |    |    |
| O-O_2  | -1 | -7.20053 | 4.64803 | 1.59509  | L |      |     |    |    |
| O-O_2  | -1 | -5.70162 | 6.65454 | 0.65279  | L |      |     |    |    |
| Si-Si3 | -1 | -2.96867 | 6.8797  | 3.33106  | L |      |     |    |    |
| O-O_2  | -1 | -3.59114 | 5.57252 | 3.94668  | L |      |     |    |    |
| O-O_2  | -1 | -1.36951 | 6.63733 | 3.45362  | L |      |     |    |    |
| Si-Si3 | -1 | 2.85443  | 6.92801 | 3.33677  | L |      |     |    |    |
| O-O_2  | -1 | 3.4973   | 5.63133 | 3.95363  | L |      |     |    |    |
| O-O_2  | -1 | 1.25992  | 6.65915 | 3.4562   | L |      |     |    |    |

|        |    |          |          |          |   |      |     |    |    |
|--------|----|----------|----------|----------|---|------|-----|----|----|
| Si-Si3 | -1 | -4.18956 | 7.06427  | 0.46629  | L |      |     |    |    |
| Si-Si3 | -1 | -2.81396 | 9.48234  | -0.67139 | L |      |     |    |    |
| O-O_2  | -1 | -1.38693 | 8.87848  | -0.37859 | L |      |     |    |    |
| O-O_2  | -1 | -4.02214 | 8.5216   | -0.22262 | L |      |     |    |    |
| Si-Si3 | -1 | 4.07835  | 7.13287  | 0.4744   | L |      |     |    |    |
| Si-Si3 | -1 | 2.66505  | 9.52779  | -0.66602 | L |      |     |    |    |
| O-O_2  | -1 | 1.24702  | 8.90033  | -0.37601 | L |      |     |    |    |
| O-O_2  | -1 | 3.88812  | 8.58723  | -0.21486 | L |      |     |    |    |
| O-O_2  | -1 | -0.06241 | 7.78001  | 1.5324   | L |      |     |    |    |
| O-O_2  | -1 | 8.03693  | -7.18579 | -2.42934 | L |      |     |    |    |
| O-O_2  | -1 | -7.91543 | -6.24601 | -0.17987 | L |      |     |    |    |
| O-O_2  | -1 | -7.42009 | -2.47329 | -1.968   | L |      |     |    |    |
| O-O_2  | -1 | -2.75283 | -3.45437 | -4.24831 | L |      |     |    |    |
| O-O_2  | -1 | -3.24814 | -7.23051 | -2.46743 | L |      |     |    |    |
| O-O_2  | 0  | 2.81459  | -2.33589 | -1.97845 | H |      |     |    |    |
| O-O_2  | -1 | 3.36893  | -6.10098 | -0.19039 | L |      |     |    |    |
| O-O_2  | -1 | 2.82496  | -3.40809 | -4.24284 | L |      |     |    |    |
| O-O_2  | -1 | 3.38     | -7.17552 | -2.46093 | L |      |     |    |    |
| O-O_2  | -1 | -2.76395 | -2.38333 | -1.98509 | H |      |     |    |    |
| O-O_2  | -1 | -3.25929 | -6.15591 | -0.1969  | L |      |     |    |    |
| O-O_2  | -1 | -7.90431 | -7.31805 | -2.44497 | L |      |     |    |    |
| O-O_2  | -1 | 8.02581  | -6.11375 | -0.16424 | L |      |     |    |    |
| O-O_2  | -1 | 7.47145  | -2.34974 | -1.9534  | L |      |     |    |    |
| Si-Si3 | -1 | 0.06183  | -6.88213 | -1.22644 | L | H-H_ | 117 | 0. | 0. |
| Si-Si3 | -1 | 0.05961  | -6.23742 | -4.30305 | L |      |     |    |    |
| Si-Si3 | -1 | 7.17609  | -8.13623 | -3.36944 | L |      |     |    |    |
| O-O_2  | -1 | 5.71923  | -7.59811 | -3.63127 | L |      |     |    |    |
| Si-Si3 | -1 | -7.02662 | -8.25406 | -3.38337 | L |      |     |    |    |
| O-O_2  | -1 | -5.57838 | -7.69184 | -3.64235 | L |      |     |    |    |
| Si-Si3 | -1 | -4.46085 | 0.12678  | -4.56589 | L |      |     |    |    |
| Si-Si3 | -1 | -3.63061 | -2.51824 | -3.30987 | L | H-H_ | 77  | 0. | 0. |
| Si-Si3 | -1 | -2.84543 | -7.46669 | -0.96408 | L |      |     |    |    |
| O-O_2  | -1 | -3.57986 | -1.07436 | -3.99308 | L |      |     |    |    |
| O-O_2  | -1 | -5.07877 | -3.08057 | -3.05093 | L |      |     |    |    |
| O-O_2  | -1 | -1.24628 | -7.70875 | -0.84167 | L |      |     |    |    |
| Si-Si3 | -1 | 4.47394  | 0.20091  | -4.55713 | L |      |     |    |    |
| Si-Si3 | -1 | 3.6853   | -2.45842 | -3.303   | L | H-H_ | 73  | 0. | 0. |
| Si-Si3 | -1 | 2.97767  | -7.41838 | -0.95837 | L |      |     |    |    |
| O-O_2  | -1 | 3.61187  | -1.0147  | -3.98603 | L |      |     |    |    |
| O-O_2  | -1 | 5.14266  | -2.99577 | -3.0409  | L |      |     |    |    |
| O-O_2  | -1 | 1.38316  | -7.68694 | -0.83909 | L |      |     |    |    |
| Si-Si3 | -1 | 6.66094  | -3.38066 | -2.85129 | L |      |     |    |    |
| Si-Si3 | -1 | 8.07424  | -5.77528 | -1.71101 | L |      |     |    |    |
| O-O_2  | -1 | 6.85052  | -4.83472 | -2.16217 | L |      |     |    |    |

|        |    |          |          |          |   |      |     |    |    |
|--------|----|----------|----------|----------|---|------|-----|----|----|
| Si-Si3 | -1 | -6.59083 | -3.4906  | -2.86429 | L |      |     |    |    |
| Si-Si3 | -1 | -7.96643 | -5.90836 | -1.72675 | L |      |     |    |    |
| O-O_2  | -1 | -6.75825 | -4.94763 | -2.17552 | L |      |     |    |    |
| Si-Si3 | -1 | -4.06632 | -7.28181 | -3.829   | L |      |     |    |    |
| Si-Si3 | -1 | -2.69072 | -4.86405 | -4.96654 | L |      |     |    |    |
| O-O_2  | -1 | -1.26369 | -5.46791 | -4.67374 | L |      |     |    |    |
| O-O_2  | -1 | -3.8989  | -5.82478 | -4.51777 | L |      |     |    |    |
| Si-Si3 | -1 | 4.20159  | -7.21321 | -3.82089 | L |      |     |    |    |
| Si-Si3 | -1 | 2.7883   | -4.81859 | -4.96116 | L |      |     |    |    |
| O-O_2  | -1 | 1.37026  | -5.44605 | -4.67115 | L |      |     |    |    |
| O-O_2  | -1 | 4.01136  | -5.75915 | -4.51001 | L |      |     |    |    |
| O-O_2  | -1 | -5.37908 | 0.71528  | -3.46321 | L |      |     |    |    |
| O-O_2  | -1 | 5.38076  | 0.80455  | -3.45266 | L |      |     |    |    |
| O-O_2  | -1 | 0.06083  | -6.56595 | -2.76184 | L |      |     |    |    |
| O-O_2  | -1 | 0.0499   | -5.49376 | -0.49673 | H |      |     |    |    |
| O-O_2  | -1 | 8.01471  | -5.043   | 2.09814  | L |      |     |    |    |
| O-O_2  | -1 | 7.46032  | -1.27516 | 0.31714  | L |      |     |    |    |
| O-O_2  | -1 | -7.93765 | -4.1028  | 4.34851  | L |      |     |    |    |
| O-O_2  | -1 | -7.44231 | -0.33007 | 2.56038  | L |      |     |    |    |
| O-O_2  | -1 | -2.7752  | -1.31074 | 0.28083  | H |      |     |    |    |
| O-O_2  | -1 | -3.27036 | -5.0873  | 2.06095  | L |      |     |    |    |
| O-O_2  | 0  | 2.60369  | -0.19841 | 2.58583  | H |      |     |    |    |
| O-O_2  | -1 | 3.34664  | -3.9577  | 4.33798  | L |      |     |    |    |
| O-O_3  | 0  | 2.56865  | -1.27566 | 0.2572   | H |      |     |    |    |
| O-O_2  | -1 | 3.35781  | -5.03242 | 2.06747  | L |      |     |    |    |
| O-O_2  | -1 | -2.78598 | -0.23993 | 2.5433   | H |      |     |    |    |
| O-O_2  | -1 | -3.28151 | -4.01269 | 4.33148  | L |      |     |    |    |
| O-O_2  | -1 | -7.92653 | -5.17526 | 2.08251  | L |      |     |    |    |
| O-O_2  | -1 | -7.43123 | -1.39868 | 0.30253  | L |      |     |    |    |
| O-O_2  | -1 | 8.00359  | -3.97053 | 4.36414  | L |      |     |    |    |
| O-O_2  | -1 | 7.44923  | -0.20655 | 2.575    | L |      |     |    |    |
| Si-Si3 | -1 | 0.0397   | -4.73893 | 3.30188  | L | H-H_ | 173 | 0. | 0. |
| Si-Si3 | -1 | 0.03819  | -4.13602 | 0.24131  | H |      |     |    |    |
| Si-Si3 | -1 | 7.15386  | -5.99301 | 1.15894  | L |      |     |    |    |
| Si-Si3 | -1 | 7.86199  | -1.03229 | -1.18542 | L |      |     |    |    |
| O-O_2  | -1 | 7.21913  | 0.2641   | -1.80214 | L |      |     |    |    |
| O-O_2  | -1 | 5.69701  | -5.45492 | 0.89705  | L |      |     |    |    |
| Si-Si3 | -1 | -7.04884 | -6.11085 | 1.14501  | L |      |     |    |    |
| Si-Si3 | -1 | -7.83394 | -1.16251 | -1.20082 | L |      |     |    |    |
| O-O_2  | -1 | -7.21147 | 0.14437  | -1.81629 | L |      |     |    |    |
| O-O_2  | -1 | -5.6006  | -5.54863 | 0.88603  | L |      |     |    |    |
| Si-Si3 | -1 | -4.48308 | 2.27     | -0.03751 | L |      |     |    |    |
| Si-Si3 | -1 | -3.65278 | -0.37518 | 1.21837  | H |      |     |    |    |
| Si-Si3 | -1 | -2.86766 | -5.32347 | 3.5643   | L |      |     |    |    |



|        |    |          |          |          |   |      |     |    |    |
|--------|----|----------|----------|----------|---|------|-----|----|----|
| O-O_2  | -1 | -3.60206 | 1.06885  | 0.53529  | L | H-H_ | 145 | 0. | 0. |
| O-O_2  | -1 | -5.10098 | -0.9373  | 1.4776   | L | H-H_ | 145 | 0. | 0. |
| O-O_2  | -1 | -1.2685  | -5.56554 | 3.68671  | L |      |     |    |    |
| Si-Si3 | 0  | 4.43804  | 2.32388  | -0.02118 | H |      |     |    |    |
| Si-Si3 | -1 | 2.95545  | -5.27516 | 3.57001  | L |      |     |    |    |
| O-O_2  | 0  | 3.36782  | 1.23844  | 0.38819  | H |      |     |    |    |
| O-O_2  | 0  | 5.11098  | -0.87524 | 1.42283  | H |      |     |    |    |
| O-O_2  | -1 | 1.36094  | -5.54372 | 3.68929  | L |      |     |    |    |
| Si-Si3 | -1 | 6.63866  | -1.23735 | 1.67701  | L | H-H_ | 153 | 0. | 0. |
| Si-Si3 | -1 | 8.05201  | -3.63206 | 2.81737  | L |      |     |    |    |
| O-O_2  | -1 | 6.8283   | -2.69151 | 2.36621  | L |      |     |    |    |
| Si-Si3 | -1 | -6.61305 | -1.34739 | 1.66409  | L |      |     |    |    |
| Si-Si3 | -1 | -7.98865 | -3.76515 | 2.80164  | L |      |     |    |    |
| O-O_2  | -1 | -6.78048 | -2.80441 | 2.35286  | L |      |     |    |    |
| Si-Si3 | -1 | -4.08854 | -5.1386  | 0.69939  | L |      |     |    |    |
| Si-Si3 | -1 | -2.71273 | -2.72106 | -0.43807 | H |      |     |    |    |
| O-O_2  | -1 | -1.25742 | -3.30884 | -0.14187 | H |      |     |    |    |
| O-O_2  | -1 | -3.92115 | -3.68151 | 0.01065  | L | H-H_ | 162 | 0. | 0. |
| Si-Si3 | -1 | 4.1791   | -5.06956 | 0.70737  | L | H-H_ | 168 | 0. | 0. |
| Si-Si3 | 0  | 2.81309  | -2.74551 | -0.46212 | H |      |     |    |    |
| O-O_2  | 0  | 1.43555  | -3.4608  | -0.14664 | H |      |     |    |    |
| O-O_2  | 0  | 4.12449  | -3.54639 | 0.01927  | H |      |     |    |    |
| O-O_2  | -1 | 5.36934  | 1.87611  | -1.1884  | H |      |     |    |    |
| O-O_2  | -1 | -5.4013  | 2.85849  | 1.06517  | L |      |     |    |    |
| O-O_2  | -1 | -5.39019 | 1.78689  | -1.19902 | L |      |     |    |    |
| O-O_2  | -1 | 5.35853  | 2.94728  | 1.07564  | H |      |     |    |    |
| O-O_2  | -1 | 0.03855  | -4.42299 | 1.76522  | H |      |     |    |    |
| O-O_2  | -1 | 0.02749  | -3.35069 | 4.03164  | L |      |     |    |    |
| O-O_2  | -1 | 7.43809  | 0.86809  | 4.84551  | L |      |     |    |    |
| O-O_2  | -1 | -2.79729 | 0.8325   | 4.80936  | L |      |     |    |    |
| O-O_2  | -1 | 2.78082  | 0.87902  | 4.81414  | H |      |     |    |    |
| O-O_2  | -1 | -7.45345 | 0.74453  | 4.83091  | L |      |     |    |    |
| Si-Si3 | -1 | 0.01509  | -1.95048 | 4.7545   | L | H-H_ | 204 | 0. | 0. |
| Si-Si3 | -1 | 7.13164  | -3.84979 | 5.68732  | L |      |     |    |    |
| Si-Si3 | -1 | 7.83977  | 1.11093  | 3.34296  | L |      |     |    |    |
| O-O_2  | -1 | 7.19691  | 2.40731  | 2.72624  | L |      |     |    |    |
| O-O_2  | -1 | 5.67478  | -3.31168 | 5.42549  | L |      |     |    |    |
| Si-Si3 | -1 | -7.07106 | -3.96763 | 5.67339  | L |      |     |    |    |
| Si-Si3 | -1 | -7.85616 | 0.98071  | 3.32756  | L |      |     |    |    |
| O-O_2  | -1 | -7.23369 | 2.28759  | 2.71209  | L |      |     |    |    |
| O-O_2  | -1 | -5.62282 | -3.40541 | 5.41441  | L |      |     |    |    |
| Si-Si3 | -1 | -4.5053  | 4.41322  | 4.49087  | L |      |     |    |    |
| Si-Si3 | -1 | -3.67497 | 1.76808  | 5.74685  | L |      |     |    |    |
| O-O_2  | -1 | -3.62431 | 3.21207  | 5.06368  | L |      |     |    |    |

|        |    |          |          |          |   |      |     |    |    |
|--------|----|----------|----------|----------|---|------|-----|----|----|
| O-O_2  | -1 | -5.12321 | 1.20586  | 6.00583  | L |      |     |    |    |
| Si-Si3 | -1 | 4.42949  | 4.48735  | 4.49963  | L |      |     |    |    |
| Si-Si3 | -1 | 3.64114  | 1.8286   | 5.75441  | L | H-H_ | 177 | 0. | 0. |
| O-O_2  | -1 | 3.56743  | 3.27174  | 5.07073  | L |      |     |    |    |
| O-O_2  | -1 | 5.09821  | 1.29067  | 6.01586  | L |      |     |    |    |
| Si-Si3 | -1 | 6.6165   | 0.90578  | 6.20547  | L |      |     |    |    |
| Si-Si3 | -1 | -6.63527 | 0.79583  | 6.19247  | L |      |     |    |    |
| Si-Si3 | -1 | -4.11077 | -2.99538 | 5.22776  | L |      |     |    |    |
| Si-Si3 | -1 | -2.73516 | -0.5776  | 4.09023  | L | H-H_ | 128 | 0. | 0. |
| O-O_2  | -1 | -1.30814 | -1.18147 | 4.38302  | L |      |     |    |    |
| O-O_2  | -1 | -3.94334 | -1.53835 | 4.539    | L |      |     |    |    |
| Si-Si3 | -1 | 4.15713  | -2.92685 | 5.23574  | L | H-H_ | 205 | 0. | 0. |
| Si-Si3 | 0  | 2.73348  | -0.54653 | 4.11672  | H |      |     |    |    |
| O-O_2  | -1 | 1.32586  | -1.16056 | 4.38434  | H |      |     |    |    |
| O-O_2  | -1 | 3.96698  | -1.47232 | 4.54715  | H |      |     |    |    |
| O-O_2  | -1 | 5.34742  | 4.01937  | 3.33991  | L |      |     |    |    |
| O-O_2  | -1 | -5.41242 | 3.9301   | 3.32936  | L |      |     |    |    |
| H-H_   | -1 | -7.07322 | -9.58218 | -2.75502 | L |      |     |    |    |
| H-H_   | -1 | -7.09545 | -7.43897 | 1.77336  | L |      |     |    |    |
| H-H_   | -1 | -7.11767 | -5.29575 | 6.30174  | L |      |     |    |    |
| H-H_   | -1 | -3.42716 | -8.68802 | -0.3889  | L |      |     |    |    |
| H-H_   | -1 | -3.44938 | -6.54481 | 4.13948  | L |      |     |    |    |
| H-H_   | -1 | 3.57846  | -8.6299  | -0.38203 | L |      |     |    |    |
| H-H_   | -1 | 3.55623  | -6.48668 | 4.14635  | L |      |     |    |    |
| H-H_   | -1 | 7.22186  | -7.32016 | 1.78739  | L |      |     |    |    |
| H-H_   | -1 | 7.19963  | -5.17694 | 6.31577  | L |      |     |    |    |
| H-H_   | -1 | 7.9279   | -2.97106 | 6.55605  | L |      |     |    |    |
| H-H_   | -1 | -9.28323 | -0.94313 | -1.31176 | L |      |     |    |    |
| H-H_   | -1 | -7.34758 | -3.53805 | -4.12364 | L |      |     |    |    |
| H-H_   | -1 | -9.29667 | -5.34546 | -1.99969 | L |      |     |    |    |
| H-H_   | -1 | -7.82837 | -8.37912 | -4.60912 | L |      |     |    |    |
| H-H_   | -1 | -7.92938 | 3.82375  | -4.84222 | L |      |     |    |    |
| H-H_   | -1 | -7.93965 | 4.81439  | -2.74911 | L |      |     |    |    |
| H-H_   | -1 | -5.32064 | -0.33112 | -5.6668  | L |      |     |    |    |
| H-H_   | -1 | -9.30546 | 1.20009  | 3.21662  | L |      |     |    |    |
| H-H_   | -1 | -9.31889 | -3.20225 | 2.52869  | L |      |     |    |    |
| H-H_   | -1 | -7.96188 | 6.9576   | 1.77927  | L |      |     |    |    |
| H-H_   | -1 | -7.9516  | 5.96697  | -0.31383 | L |      |     |    |    |
| H-H_   | -1 | -2.87161 | 10.79076 | -0.00385 | L |      |     |    |    |
| H-H_   | -1 | 7.24408  | -9.46338 | -2.74099 | L |      |     |    |    |
| H-H_   | -1 | 9.39549  | -5.19038 | -1.98136 | L |      |     |    |    |
| H-H_   | -1 | 9.37327  | -3.04716 | 2.54702  | L |      |     |    |    |
| H-H_   | -1 | 9.30764  | -0.7888  | -1.29357 | L |      |     |    |    |
| H-H_   | -1 | 9.28542  | 1.35442  | 3.23481  | L |      |     |    |    |

|        |    |          |          |          |   |
|--------|----|----------|----------|----------|---|
| H-H_   | -1 | 7.84911  | 7.08859  | 1.79458  | L |
| H-H_   | -1 | 7.85938  | 6.09818  | -0.29806 | L |
| H-H_   | -1 | 7.87133  | 4.94538  | -2.7338  | L |
| H-H_   | -1 | 7.8816   | 3.95496  | -4.82644 | L |
| H-H_   | -1 | -2.86129 | 9.79542  | -2.10689 | L |
| H-H_   | -1 | -2.84939 | 8.64754  | -4.53223 | L |
| H-H_   | -1 | -2.83907 | 7.6522   | -6.63527 | L |
| H-H_   | -1 | 2.73162  | 7.69843  | -6.62982 | L |
| H-H_   | -1 | 2.7213   | 8.69378  | -4.52676 | L |
| H-H_   | -1 | 2.7094   | 9.84164  | -2.10144 | L |
| H-H_   | -1 | 2.69908  | 10.83699 | 0.00162  | L |
| H-H_   | -1 | -7.40228 | 1.73677  | 7.02147  | L |
| H-H_   | -1 | -5.37562 | 4.97101  | 5.53601  | L |
| H-H_   | -1 | -3.35518 | 8.1036   | 4.0477   | L |
| H-H_   | -1 | -2.87363 | 1.89347  | 6.97283  | L |
| H-H_   | -1 | -0.07276 | 8.76549  | 3.75205  | L |
| H-H_   | -1 | 2.83522  | 1.94081  | 6.97816  | L |
| H-H_   | -1 | 3.21974  | 8.15803  | 4.05407  | L |
| H-H_   | -1 | 5.28878  | 5.05935  | 5.54622  | L |
| H-H_   | -1 | 7.36616  | 1.8593   | 7.03595  | L |
| H-H_   | -1 | 3.27459  | 2.86808  | -7.123   | L |
| H-H_   | -1 | 5.34376  | -0.24253 | -5.65607 | L |
| H-H_   | -1 | 7.42085  | -3.41552 | -4.10916 | L |
| H-H_   | -1 | 7.98262  | -8.24791 | -4.59334 | L |
| H-H_   | -1 | 2.83263  | -4.5045  | -6.39653 | L |
| H-H_   | -1 | 3.45193  | -8.16674 | -4.65137 | L |
| H-H_   | -1 | 0.07111  | -7.54378 | -4.97697 | L |
| H-H_   | -1 | -2.73804 | -4.55073 | -6.40198 | L |
| H-H_   | -1 | -3.29932 | -8.22275 | -4.65799 | L |
| H-H_   | -1 | -7.88308 | -3.10205 | 6.54074  | L |
| H-H_   | -1 | -6.78717 | -0.52604 | 6.81735  | L |
| H-H_   | -1 | -3.30033 | 2.81355  | -7.1296  | L |
| H-H_   | -1 | -0.0179  | 3.47427  | -7.42771 | L |
| H-H_   | -1 | 0.01631  | -2.258   | 6.1913   | L |
| H-H_   | -1 | 3.39724  | -2.89192 | 6.49374  | L |
| H-H_   | -1 | 6.7885   | -0.41347 | 6.83069  | L |
| H-H_   | -1 | -3.35401 | -2.94793 | 6.48712  | L |
| Al-Al3 | 0  | 3.60354  | -0.17269 | 1.26305  | H |
| H-H_   | 0  | 0.95233  | 1.2425   | -0.05728 | H |
| C-C_3  | 0  | 0.0207   | 1.59759  | 0.38454  | H |
| C-C_2  | 0  | 0.238    | 2.17158  | 1.75592  | H |
| H-H_   | 0  | -0.40374 | 2.3628   | -0.27487 | H |
| H-H_   | 0  | -0.69857 | 0.7732   | 0.41112  | H |
| C-C_2  | 0  | 1.473    | 2.33487  | 2.26746  | H |

|       |   |          |         |         |   |
|-------|---|----------|---------|---------|---|
| C-C_3 | 0 | -0.944   | 2.68236 | 2.52525 | H |
| H-H_  | 0 | 2.32668  | 2.28233 | 1.60354 | H |
| H-H_  | 0 | 1.60781  | 2.79133 | 3.24255 | H |
| H-H_  | 0 | -1.19169 | 3.67996 | 2.13498 | H |
| H-H_  | 0 | -1.8308  | 2.06191 | 2.41201 | H |
| H-H_  | 0 | -0.70694 | 2.80022 | 3.58649 | H |
| H-H_  | 0 | 1.95769  | 0.53796 | 2.37055 | H |

**S5. The coordinates for the adsorption of 1-butene on HZSM-48**

|        |    |           |          |          |   |
|--------|----|-----------|----------|----------|---|
| O-O_2  | -1 | -5.97438  | -1.97428 | -3.89564 | L |
| O-O_2  | -1 | -3.45925  | -2.50664 | -4.44428 | L |
| O-O_2  | -1 | -5.95227  | -6.30455 | -3.795   | L |
| Si-Si3 | -1 | -4.4501   | -1.54024 | -3.62311 | L |
| Si-Si3 | -1 | -4.56516  | -6.30018 | -4.61452 | L |
| O-O_2  | -1 | -1.34412  | 3.87136  | -4.44159 | L |
| Si-Si3 | -1 | -2.73122  | 3.86699  | -3.62207 | L |
| O-O_2  | -1 | -5.99217  | 1.90059  | -4.34181 | L |
| O-O_2  | -1 | -3.48085  | 2.45546  | -3.79801 | L |
| Si-Si3 | -1 | -4.46458  | 1.48022  | -4.61728 | L |
| O-O_2  | -1 | -1.28674  | -8.23402 | -3.88601 | L |
| O-O_2  | -1 | -3.80292  | -7.70413 | -4.43225 | L |
| O-O_2  | -1 | -1.30868  | -3.90334 | -3.80484 | L |
| Si-Si3 | -1 | -2.8105   | -8.66682 | -3.60863 | L |
| Si-Si3 | -1 | -2.69735  | -3.9114  | -4.62168 | L |
| O-O_2  | -1 | -8.6133   | 1.88886  | -4.33928 | L |
| O-O_2  | -1 | 3.43326   | 2.48643  | -3.80468 | L |
| Si-Si3 | -1 | -10.13803 | 1.45481  | -4.61181 | L |
| O-O_2  | -1 | 1.33439   | -8.22228 | -3.88854 | L |
| O-O_2  | -1 | 1.31813   | -3.89158 | -3.80737 | L |
| Si-Si3 | -1 | 2.86294   | -8.64141 | -3.6141  | L |
| Si-Si3 | -1 | 2.70524   | -3.88721 | -4.62689 | L |
| O-O_2  | -1 | -8.59552  | -1.98602 | -3.89312 | L |
| O-O_2  | -1 | 3.45486   | -2.47567 | -4.45095 | L |
| Si-Si3 | -1 | -10.12354 | -1.56565 | -3.61765 | L |
| O-O_2  | -1 | 1.2827    | 3.88313  | -4.44413 | L |
| Si-Si3 | -1 | 2.67137   | 3.89119  | -3.62728 | L |
| O-O_2  | -1 | -7.27586  | -4.15485 | -4.56896 | L |
| Si-Si3 | -1 | -7.26926  | -5.41041 | -3.56118 | L |
| Si-Si3 | -1 | -7.28313  | -2.54615 | -4.63772 | L |
| Si-Si3 | -1 | -0.03518  | 4.77682  | -4.67946 | L |
| O-O_2  | -1 | -7.31183  | 4.07003  | -3.66597 | L |
| Si-Si3 | -1 | -7.30455  | 2.46133  | -3.5972  | L |
| O-O_2  | -1 | 0.01344   | -6.05652 | -4.57163 | L |
| Si-Si3 | -1 | 0.00876   | -4.79642 | -3.5695  | L |
| H-H_   | 95 | 0.        | 0.       | 0.       |   |

|        |    |           |          |          |   |      |     |    |    |
|--------|----|-----------|----------|----------|---|------|-----|----|----|
| Si-Si3 | -1 | 0.02059   | -7.66551 | -4.63316 | L |      |     |    |    |
| O-O_2  | -1 | -4.21401  | -0.02892 | -4.12043 | L |      |     |    |    |
| O-O_2  | -1 | -10.37367 | -0.05651 | -4.11449 | L |      |     |    |    |
| O-O_2  | -1 | -3.63074  | -5.10456 | -4.07413 | L |      |     |    |    |
| O-O_2  | -1 | 1.31195   | 3.84986  | 0.29242  | L |      |     |    |    |
| Si-Si3 | -1 | 2.71188   | 3.88772  | -0.55504 | L |      |     |    |    |
| O-O_2  | -1 | -5.96651  | -1.95569 | 4.3615   | L |      |     |    |    |
| O-O_2  | -1 | -3.45137  | -2.48804 | 3.81286  | L |      |     |    |    |
| O-O_R  | -1 | -5.9444   | -6.28595 | 4.46189  | L |      |     |    |    |
| Si-Si3 | -1 | -4.44222  | -1.52164 | 4.63402  | L |      |     |    |    |
| Si-Si3 | -1 | -4.55729  | -6.28158 | 3.64237  | L |      |     |    |    |
| O-O_2  | -1 | -1.33624  | 3.88996  | 3.8153   | L |      |     |    |    |
| Si-Si3 | -1 | -2.72335  | 3.88559  | 4.63507  | L |      |     |    |    |
| O-O_2  | -1 | -8.592    | -1.97771 | -0.20225 | L |      |     |    |    |
| O-O_3  | 0  | 3.46162   | -2.29756 | 0.46943  | H |      |     |    |    |
| Si-Si3 | -1 | -10.12054 | -1.55858 | -0.47669 | L |      |     |    |    |
| O-O_2  | -1 | -5.98429  | 1.91919  | 3.91508  | L |      |     |    |    |
| O-O_2  | -1 | -3.47297  | 2.47406  | 4.45888  | L |      |     |    |    |
| Si-Si3 | -1 | -4.45671  | 1.49882  | 3.63961  | L |      |     |    |    |
| O-O_2  | -1 | 1.33791   | -8.21397 | -0.19767 | L |      |     |    |    |
| O-O_2  | 0  | 1.2117    | -3.78211 | -0.47028 | H |      |     |    |    |
| Si-Si3 | -1 | 2.86594   | -8.63434 | -0.47314 | L |      |     |    |    |
| O-O_2  | -1 | -8.60894  | 1.89914  | 0.22674  | L |      |     |    |    |
| O-O_2  | -1 | 3.43377   | 2.44825  | -0.37569 | L | H-H_ | 163 | 0. | 0. |
| Si-Si3 | -1 | -10.13314 | 1.46633  | 0.50413  | L |      |     |    |    |
| O-O_2  | -1 | -1.27887  | -8.21542 | 4.37113  | L |      |     |    |    |
| O-O_2  | -1 | -3.79505  | -7.68553 | 3.82489  | L |      |     |    |    |
| O-O_2  | -1 | -1.3008   | -3.88474 | 4.45206  | L |      |     |    |    |
| Si-Si3 | -1 | -2.80263  | -8.64822 | 4.64852  | L |      |     |    |    |
| Si-Si3 | -1 | -2.68947  | -3.8928  | 3.6352   | L |      |     |    |    |
| O-O_2  | -1 | -8.60542  | 1.90745  | 3.91761  | L |      |     |    |    |
| O-O_2  | -1 | 3.44114   | 2.50502  | 4.45221  | L |      |     |    |    |
| Si-Si3 | -1 | -10.13015 | 1.47341  | 3.64508  | L |      |     |    |    |
| O-O_2  | -1 | -1.28322  | -8.2257  | -0.19515 | L |      |     |    |    |
| O-O_2  | -1 | -3.79836  | -7.69335 | 0.35349  | L |      |     |    |    |
| O-O_2  | 0  | -1.40144  | -3.86134 | -0.36014 | H |      |     |    |    |
| Si-Si3 | -1 | -2.80751  | -8.65975 | -0.46767 | L |      |     |    |    |
| Si-Si3 | -1 | -2.74963  | -3.91773 | 0.56113  | H |      |     |    |    |
| O-O_2  | -1 | -5.98781  | 1.91088  | 0.22422  | L |      |     |    |    |
| O-O_2  | -1 | -3.47754  | 2.46328  | -0.32687 | L |      |     |    |    |
| Si-Si3 | -1 | -4.481    | 1.48075  | 0.50002  | L |      |     |    |    |
| O-O_2  | -1 | 1.34227   | -8.20368 | 4.3686   | L |      |     |    |    |
| O-O_2  | -1 | 1.32601   | -3.87298 | 4.44952  | L | H-H_ | 80  | 0. | 0. |
| Si-Si3 | -1 | 2.87081   | -8.62282 | 4.64305  | L |      |     |    |    |

|        |    |           |          |          |   |      |     |       |
|--------|----|-----------|----------|----------|---|------|-----|-------|
| Si-Si3 | 0  | 2.71312   | -3.8686  | 3.63001  | H |      |     |       |
| O-O_2  | -1 | -1.34468  | 3.84345  | 0.28372  | L |      |     |       |
| Si-Si3 | -1 | -2.75707  | 3.87568  | -0.5464  | L |      |     |       |
| O-O_2  | -1 | -8.58764  | -1.96743 | 4.36402  | L |      |     |       |
| O-O_2  | -1 | 3.46274   | -2.45707 | 3.80619  | L | H-H_ | 80  | 0. 0. |
| Si-Si3 | -1 | -10.11566 | -1.54705 | 4.63949  | L |      |     |       |
| O-O_2  | -1 | 1.29057   | 3.90173  | 3.81277  | L |      |     |       |
| Si-Si3 | -1 | 2.67924   | 3.90979  | 4.62986  | L |      |     |       |
| O-O_2  | -1 | -6.08416  | -1.8723  | -0.39229 | L |      |     |       |
| O-O_2  | -1 | -3.60323  | -2.51667 | 0.48651  | L | H-H_ | 73  | 0. 0. |
| O-O_R  | -1 | -5.94892  | -6.29664 | -0.2857  | L |      |     |       |
| Si-Si3 | -1 | -4.50172  | -1.5615  | -0.49395 | L |      |     |       |
| Si-Si3 | -1 | -4.56025  | -6.28859 | 0.53114  | L |      |     |       |
| O-O_R  | -1 | -7.2702   | -4.87436 | -2.04235 | L |      |     |       |
| O-O_2  | -1 | -7.30961  | 4.80814  | 2.06439  | L |      |     |       |
| O-O_2  | -1 | -0.03782  | -5.5026  | -2.06961 | H |      |     |       |
| O-O_2  | -1 | -7.27885  | -2.05567 | 2.07983  | L |      |     |       |
| O-O_2  | -1 | -7.30096  | 1.98945  | -2.05778 | L |      |     |       |
| O-O_2  | -1 | 0.02913   | -8.12572 | 2.08653  | L |      |     |       |
| O-O_2  | -1 | -3.98872  | -1.7521  | -2.03159 | L |      |     |       |
| O-O_2  | -1 | -10.45046 | -1.6812  | -2.04651 | L |      |     |       |
| O-O_2  | -1 | -4.12978  | 1.61498  | 2.06855  | L |      |     |       |
| O-O_2  | -1 | 3.19286   | -8.51879 | -2.04412 | L |      |     |       |
| O-O_2  | -1 | -10.46113 | 1.58662  | 2.07466  | L |      |     |       |
| O-O_2  | -1 | -3.13849  | -8.54714 | -2.03801 | L |      |     |       |
| O-O_2  | -1 | 2.34844   | 4.14737  | -2.07184 | L |      |     |       |
| O-O_2  | -1 | -4.88318  | -6.03302 | 2.0865   | L |      |     |       |
| O-O_2  | -1 | -2.40761  | 4.12607  | -2.06726 | L |      |     |       |
| O-O_2  | 0  | 2.22866   | -4.14452 | 2.13262  | H |      |     |       |
| O-O_2  | -1 | -2.24564  | -4.21334 | 2.07366  | L | H-H_ | 73  | 0. 0. |
| Si-Si3 | -1 | -0.0258   | 4.76756  | 0.55282  | L |      |     |       |
| O-O_R  | -1 | -7.26798  | -4.13625 | 3.68793  | L |      |     |       |
| Si-    | -1 | -7.26139  | -5.39181 | 4.69572  | L |      |     |       |
| Si-Si3 | -1 | -7.27526  | -2.52755 | 3.61917  | L |      |     |       |
| Si-Si3 | -1 | -0.02731  | 4.79542  | 3.57768  | L |      |     |       |
| O-O_R  | -1 | -7.27104  | -4.14347 | 0.48109  | L |      |     |       |
| Si-    | -1 | -7.26637  | -5.40356 | -0.52104 | L |      |     |       |
| Si-Si3 | -1 | -7.27819  | -2.53447 | 0.54262  | L |      |     |       |
| O-O_2  | -1 | -7.30395  | 4.08863  | 4.59093  | L |      |     |       |
| Si-Si3 | -1 | -7.29668  | 2.47993  | 4.65994  | L |      |     |       |
| O-O_2  | -1 | 0.00666   | -5.98223 | 0.54898  | H |      |     |       |
| Si-Si3 | 0  | -0.04282  | -4.79033 | -0.60047 | H |      |     |       |
| Si-Si3 | -1 | 0.02553   | -7.65383 | 0.54718  | L | H-H_ | 120 | 0. 0. |
| O-O_2  | -1 | -7.30877  | 4.07725  | -0.45888 | L |      |     |       |

|        |    |           |          |          |   |      |     |    |    |
|--------|----|-----------|----------|----------|---|------|-----|----|----|
| Si-Si3 | -1 | -7.30162  | 2.46826  | -0.52065 | L |      |     |    |    |
| O-O_2  | -1 | 0.02132   | -6.03792 | 3.68526  | L |      |     |    |    |
| Si-Si3 | -1 | 0.01664   | -4.77783 | 4.68739  | L |      |     |    |    |
| Si-Si3 | -1 | 0.02846   | -7.64691 | 3.62373  | L |      |     |    |    |
| O-O_2  | -1 | -4.20613  | -0.01032 | 4.13646  | L |      |     |    |    |
| O-O_2  | -1 | -10.36974 | -0.04721 | 0.01408  | L |      |     |    |    |
| O-O_2  | -1 | -10.3658  | -0.03791 | 4.1424   | L |      |     |    |    |
| O-O_2  | -1 | -4.22151  | -0.03194 | -0.01742 | L |      |     |    |    |
| O-O_2  | -1 | -3.62286  | -5.08597 | 4.18301  | L |      |     |    |    |
| O-O_2  | -1 | -3.64994  | -5.08836 | -0.13674 | L | H-H_ | 73  | 0. | 0. |
| O-O_2  | -1 | 8.58732   | -1.90907 | -3.90968 | L |      |     |    |    |
| Si-Si3 | -1 | 10.11161  | -1.47502 | -3.63715 | L |      |     |    |    |
| O-O_2  | -1 | 8.56953   | 1.96581  | -4.35585 | L |      |     |    |    |
| Si-Si3 | -1 | 10.09712  | 1.54544  | -4.63132 | L |      |     |    |    |
| O-O_2  | -1 | 5.9484    | 1.95407  | -4.35332 | L |      |     |    |    |
| Si-Si3 | -1 | 4.42411   | 1.52003  | -4.62585 | L |      |     |    |    |
| O-O_2  | -1 | 3.8451    | -7.66988 | -4.43962 | L |      |     |    |    |
| O-O_2  | -1 | 5.96619   | -1.92081 | -3.90715 | L |      |     |    |    |
| O-O_2  | -1 | 5.98262   | -6.2511  | -3.8065  | L |      |     |    |    |
| Si-Si3 | -1 | 4.43861   | -1.50043 | -3.63171 | L | H-H_ | 180 | 0. | 0. |
| Si-Si3 | -1 | 4.59438   | -6.25915 | -4.62335 | L |      |     |    |    |
| O-O_2  | -1 | 7.28584   | -4.08963 | -4.583   | L |      |     |    |    |
| Si-Si3 | -1 | 7.29244   | -5.34519 | -3.57521 | L |      |     |    |    |
| Si-Si3 | -1 | 7.27857   | -2.48093 | -4.65176 | L |      |     |    |    |
| O-O_2  | -1 | 7.24988   | 4.13525  | -3.68    | L |      |     |    |    |
| Si-Si3 | -1 | 7.25715   | 2.52654  | -3.61124 | L |      |     |    |    |
| O-O_2  | -1 | 10.34769  | 0.0363   | -4.13447 | L |      |     |    |    |
| O-O_2  | -1 | 4.18803   | 0.00871  | -4.12853 | L |      |     |    |    |
| O-O_2  | -1 | 3.65019   | -5.07195 | -4.08115 | L |      |     |    |    |
| O-O_2  | -1 | 8.5952    | -1.89047 | 4.34746  | L |      |     |    |    |
| Si-Si3 | -1 | 10.11948  | -1.45642 | 4.61999  | L |      |     |    |    |
| O-O_2  | -1 | 6.06404   | -1.85361 | -0.39998 | H |      |     |    |    |
| O-O_2  | -1 | 5.98597   | -6.24319 | -0.29721 | L |      |     |    |    |
| Si-Si3 | 0  | 4.52093   | -1.46397 | -0.54527 | H |      |     |    |    |
| Si-Si3 | -1 | 4.59928   | -6.24755 | 0.52231  | L | H-H_ | 198 | 0. | 0. |
| O-O_2  | -1 | 8.57741   | 1.98441  | 3.90105  | L |      |     |    |    |
| Si-Si3 | -1 | 10.105    | 1.56403  | 3.62558  | L |      |     |    |    |
| O-O_2  | -1 | 3.84967   | -7.6591  | 0.34612  | L |      |     |    |    |
| O-O_2  | -1 | 5.95276   | 1.96431  | 0.21271  | L | H-H_ | 163 | 0. | 0. |
| Si-Si3 | -1 | 4.45654   | 1.54611  | 0.49373  | H |      |     |    |    |
| O-O_2  | -1 | 5.95628   | 1.97267  | 3.90357  | L |      |     |    |    |
| Si-Si3 | -1 | 4.43199   | 1.53863  | 3.63105  | L |      |     |    |    |
| O-O_2  | -1 | 8.57389   | 1.9761   | 0.21018  | L |      |     |    |    |
| Si-Si3 | -1 | 10.102    | 1.55696  | 0.48462  | L |      |     |    |    |

|        |    |          |          |          |   |      |     |    |    |
|--------|----|----------|----------|----------|---|------|-----|----|----|
| O-O_2  | -1 | 3.85298  | -7.65128 | 3.81752  | L |      |     |    |    |
| O-O_2  | -1 | 5.97406  | -1.90221 | 4.34999  | L |      |     |    |    |
| O-O_2  | -1 | 5.9905   | -6.2325  | 4.45039  | L |      |     |    |    |
| Si-Si3 | -1 | 4.44648  | -1.48183 | 4.62546  | L |      |     |    |    |
| Si-Si3 | -1 | 4.60226  | -6.24056 | 3.63354  | L |      |     |    |    |
| O-O_2  | -1 | 8.59084  | -1.90075 | -0.21881 | L |      |     |    |    |
| Si-Si3 | -1 | 10.1146  | -1.46795 | -0.4962  | L |      |     |    |    |
| O-O_2  | -1 | 7.2915   | -4.80914 | -2.05638 | L |      |     |    |    |
| O-O_2  | -1 | 7.25209  | 4.87336  | 2.05036  | L |      |     |    |    |
| O-O_2  | -1 | 7.28285  | -1.99045 | 2.06579  | L |      |     |    |    |
| O-O_2  | -1 | 7.26075  | 2.05467  | -2.07181 | L |      |     |    |    |
| O-O_2  | -1 | 10.44302 | -1.58763 | -2.06665 | L |      |     |    |    |
| O-O_2  | -1 | 3.98214  | -1.71211 | -2.04598 | H |      |     |    |    |
| O-O_2  | -1 | 10.43236 | 1.6802   | 2.05452  | L |      |     |    |    |
| O-O_2  | -1 | 4.10057  | 1.65185  | 2.06063  | L | H-H_ | 163 | 0. | 0. |
| O-O_2  | -1 | 4.92292  | -5.9891  | 2.07705  | L |      |     |    |    |
| O-O_2  | -1 | 7.29372  | -4.07103 | 3.6739   | L |      |     |    |    |
| Si-Si3 | -1 | 7.30031  | -5.3266  | 4.68168  | L |      |     |    |    |
| Si-Si3 | -1 | 7.28645  | -2.46233 | 3.60513  | L |      |     |    |    |
| O-O_2  | -1 | 7.29066  | -4.07826 | 0.46705  | L |      |     |    |    |
| Si-Si3 | -1 | 7.29534  | -5.33835 | -0.53508 | L |      |     |    |    |
| Si-Si3 | -1 | 7.28351  | -2.46926 | 0.52858  | L | H-H_ | 155 | 0. | 0. |
| O-O_2  | -1 | 7.25775  | 4.15385  | 4.57689  | L |      |     |    |    |
| Si-Si3 | -1 | 7.26502  | 2.54514  | 4.6459   | L |      |     |    |    |
| O-O_2  | -1 | 7.25293  | 4.14247  | -0.47291 | L |      |     |    |    |
| Si-Si3 | -1 | 7.26007  | 2.5335   | -0.53469 | L |      |     |    |    |
| O-O_2  | -1 | 10.35557 | 0.0549   | 4.12242  | L |      |     |    |    |
| O-O_2  | 0  | 4.24006  | 0.0359   | -0.04362 | H |      |     |    |    |
| O-O_2  | -1 | 4.1959   | 0.02731  | 4.12836  | L |      |     |    |    |
| O-O_2  | -1 | 10.35163 | 0.0456   | -0.0059  | L |      |     |    |    |
| O-O_2  | 0  | 3.75852  | -5.0662  | -0.16924 | H |      |     |    |    |
| O-O_2  | -1 | 3.65806  | -5.05336 | 4.17599  | L | H-H_ | 80  | 0. | 0. |
| O-O_2  | -1 | -1.36081 | 8.20267  | -4.36042 | L |      |     |    |    |
| O-O_2  | -1 | -3.87109 | 7.65028  | -3.80934 | L |      |     |    |    |
| Si-Si3 | -1 | -2.88892 | 8.62181  | -4.63487 | L |      |     |    |    |
| O-O_2  | -1 | -6.00904 | 6.2315   | -4.44246 | L |      |     |    |    |
| Si-Si3 | -1 | -4.62037 | 6.23955  | -3.62561 | L |      |     |    |    |
| O-O_2  | -1 | 1.26032  | 8.21442  | -4.36295 | L |      |     |    |    |
| Si-Si3 | -1 | 2.78452  | 8.64722  | -4.64034 | L |      |     |    |    |
| O-O_2  | -1 | -0.03986 | 6.0363   | -3.67733 | L |      |     |    |    |
| Si-Si3 | -1 | -0.04701 | 7.6453   | -3.6158  | L |      |     |    |    |
| Si-Si3 | -1 | -7.31842 | 5.32498  | -4.67375 | L |      |     |    |    |
| O-O_2  | -1 | -3.67632 | 5.05215  | -4.16781 | L |      |     |    |    |
| O-O_2  | -1 | 1.26468  | 8.2247   | 0.20308  | L |      |     |    |    |



|        |    |          |         |          |   |
|--------|----|----------|---------|----------|---|
| Si-Si3 | -1 | 2.7894   | 8.65874 | 0.4756   | L |
| O-O_2  | -1 | -1.35294 | 8.22127 | 3.89647  | L |
| O-O_2  | -1 | -3.86322 | 7.66887 | 4.44755  | L |
| Si-Si3 | -1 | -2.88105 | 8.64041 | 3.62203  | L |
| O-O_2  | -1 | -6.00117 | 6.25009 | 3.81443  | L |
| Si-Si3 | -1 | -4.61249 | 6.25815 | 4.63153  | L |
| O-O_2  | -1 | -6.00451 | 6.24219 | 0.30539  | L |
| Si-Si3 | -1 | -4.6174  | 6.24656 | -0.51439 | L |
| O-O_2  | -1 | -1.35646 | 8.21296 | 0.2056   | L |
| O-O_2  | -1 | -3.86778 | 7.65809 | -0.33819 | L |
| Si-Si3 | -1 | -2.88404 | 8.63333 | 0.48107  | L |
| O-O_2  | -1 | 1.2682   | 8.23301 | 3.89394  | L |
| Si-Si3 | -1 | 2.7924   | 8.66582 | 3.61656  | L |
| O-O_2  | -1 | -0.03114 | 5.32401 | 2.05629  | L |
| O-O_2  | -1 | -0.04767 | 8.1241  | -2.07851 | L |
| O-O_2  | -1 | 3.12038  | 8.54614 | 2.04603  | L |
| O-O_2  | -1 | -3.21097 | 8.51778 | 2.05213  | L |
| O-O_2  | -1 | -4.94102 | 5.98748 | -2.06903 | L |
| O-O_2  | -1 | -0.0368  | 6.04353 | -0.47024 | L |
| Si-Si3 | -1 | -0.04407 | 7.65223 | -0.53925 | L |
| O-O_2  | -1 | -0.03198 | 6.0549  | 4.57956  | L |
| Si-Si3 | -1 | -0.03913 | 7.6639  | 4.64134  | L |
| Si-Si3 | -1 | -7.31054 | 5.34358 | 3.58339  | L |
| Si-Si3 | -1 | -7.31344 | 5.33673 | 0.54301  | L |
| O-O_2  | -1 | -3.66844 | 5.07075 | 4.08908  | L |
| O-O_2  | -1 | -3.67231 | 5.06161 | 0.0316   | L |
| O-O_2  | -1 | 5.92585  | 6.28495 | -4.45396 | L |
| Si-Si3 | -1 | 4.53918  | 6.28057 | -3.63444 | L |
| O-O_2  | -1 | 3.77694  | 7.68453 | -3.81672 | L |
| Si-Si3 | -1 | 7.24328  | 5.3902  | -4.68779 | L |
| O-O_2  | -1 | 3.60461  | 5.08476 | -4.17483 | L |
| O-O_2  | -1 | 3.78025  | 7.69235 | -0.34557 | L |
| O-O_2  | -1 | 5.93038  | 6.29564 | 0.29388  | L |
| Si-Si3 | -1 | 4.54214  | 6.28758 | -0.52322 | L |
| O-O_2  | -1 | 5.93373  | 6.30354 | 3.80293  | L |
| Si-Si3 | -1 | 4.54705  | 6.29917 | 4.6227   | L |
| O-O_2  | -1 | 3.78481  | 7.70312 | 4.44018  | L |
| O-O_2  | -1 | 4.86507  | 6.0314  | -2.07849 | L |
| Si-Si3 | -1 | 7.25116  | 5.4088  | 3.56935  | L |
| Si-Si3 | -1 | 7.24826  | 5.40195 | 0.52897  | L |
| O-O_2  | -1 | 3.60861  | 5.09422 | 0.02458  | L |
| O-O_2  | -1 | 3.61248  | 5.10336 | 4.08206  | L |
| H-H_   | -1 | -3.08969 | 9.83732 | -4.24037 | L |
| H-H_   | -1 | -3.08556 | 9.84706 | 0.08148  | L |

|      |    |           |          |          |   |
|------|----|-----------|----------|----------|---|
| H-H_ | -1 | -3.08181  | 9.85592  | 4.01652  | L |
| H-H_ | -1 | 2.9748    | 9.86453  | -4.2462  | L |
| H-H_ | -1 | 2.97892   | 9.87427  | 0.07562  | L |
| H-H_ | -1 | 2.98268   | 9.88313  | 4.0107   | L |
| H-H_ | -1 | 8.29594   | 6.11874  | -4.50191 | L |
| H-H_ | -1 | 8.30058   | 6.12965  | 0.338    | L |
| H-H_ | -1 | 8.30384   | 6.13735  | 3.75504  | L |
| H-H_ | -1 | 10.88785  | 2.32933  | -3.97279 | L |
| H-H_ | -1 | 10.89147  | 2.33788  | -0.17893 | L |
| H-H_ | -1 | 10.89572  | 2.34793  | 4.2841   | L |
| H-H_ | -1 | 10.3603   | 1.63883  | -5.89441 | L |
| H-H_ | -1 | -8.3772   | 6.04406  | -4.48583 | L |
| H-H_ | -1 | -8.37261  | 6.05498  | 0.35407  | L |
| H-H_ | -1 | -8.36935  | 6.06268  | 3.77111  | L |
| H-H_ | -1 | -10.93447 | 2.2316   | -3.95176 | L |
| H-H_ | -1 | -10.93085 | 2.24014  | -0.1579  | L |
| H-H_ | -1 | -10.92659 | 2.2502   | 4.30514  | L |
| H-H_ | -1 | -10.37854 | -1.63996 | 5.90269  | L |
| H-H_ | -1 | -10.90639 | -2.33095 | 3.98097  | L |
| H-H_ | -1 | -10.91001 | -2.3395  | 0.18687  | L |
| H-H_ | -1 | -10.91427 | -2.34955 | -4.27617 | L |
| H-H_ | -1 | -8.32215  | -6.13861 | -3.7471  | L |
| H-H_ | -1 | 10.90805  | -2.25181 | -4.29721 | L |
| H-H_ | -1 | 10.91231  | -2.24176 | 0.16583  | L |
| H-H_ | -1 | 10.91593  | -2.23321 | 3.95994  | L |
| H-H_ | -1 | 10.38595  | -1.54696 | 5.8826   | L |
| H-H_ | -1 | 8.35144   | -6.06393 | -3.76317 | L |
| H-H_ | -1 | 8.3547    | -6.05624 | -0.3459  | L |
| H-H_ | -1 | 8.35931   | -6.04534 | 4.49372  | L |
| H-H_ | -1 | 3.07123   | -9.83832 | 4.24835  | L |
| H-H_ | -1 | 3.1361    | -8.52421 | 5.90531  | L |
| H-H_ | -1 | -2.99325  | -9.86543 | 4.25421  | L |
| H-H_ | -1 | -3.06635  | -8.55199 | 5.91129  | L |
| H-H_ | -1 | -2.99737  | -9.87516 | -0.06753 | L |
| H-H_ | -1 | -3.00113  | -9.88409 | -4.00275 | L |
| H-H_ | -1 | 3.0671    | -9.84805 | -0.07336 | L |
| H-H_ | -1 | 3.06336   | -9.85698 | -4.00861 | L |
| H-H_ | -1 | 4.85218   | -6.05699 | -5.87478 | L |
| H-H_ | -1 | 7.27568   | -2.10182 | -5.88856 | L |
| H-H_ | -1 | 0.02112   | -8.05019 | -5.86824 | L |
| H-H_ | -1 | 2.44506   | -4.095   | -5.8769  | L |
| H-H_ | -1 | 7.24403   | 4.9601   | -5.9078  | L |
| H-H_ | -1 | 4.15768   | 1.61105  | -5.88844 | L |
| H-H_ | -1 | -2.43773  | -4.11687 | -5.87219 | L |

|        |    |           |          |          |   |
|--------|----|-----------|----------|----------|---|
| H-H_   | -1 | -4.82717  | -6.10034 | -5.86545 | L |
| H-H_   | -1 | 3.04821   | 8.551    | -5.90311 | L |
| H-H_   | -1 | -0.03826  | 5.20141  | -5.90139 | L |
| H-H_   | -1 | -7.28602  | -2.16703 | -5.87452 | L |
| H-H_   | -1 | -4.20174  | 1.57361  | -5.88045 | L |
| H-H_   | -1 | -3.15418  | 8.52322  | -5.89714 | L |
| H-H_   | -1 | -7.31767  | 4.89489  | -5.89376 | L |
| H-H_   | -1 | -10.40413 | 1.54583  | -5.87447 | L |
| H-H_   | -1 | -7.29379  | 2.10078  | 5.89672  | L |
| H-H_   | -1 | -4.8703   | 6.05549  | 5.88287  | L |
| H-H_   | -1 | -0.03966  | 8.04861  | 5.87641  | L |
| H-H_   | -1 | -2.46316  | 4.09389  | 5.885    | L |
| H-H_   | -1 | -7.26214  | -4.9613  | 5.91558  | L |
| H-H_   | -1 | -4.17609  | -1.61219 | 5.89671  | L |
| H-H_   | -1 | 2.41961   | 4.11576  | 5.88029  | L |
| H-H_   | -1 | 4.80907   | 6.09884  | 5.87354  | L |
| H-H_   | -1 | 0.01972   | -5.20284 | 5.90918  | L |
| H-H_   | -1 | 4.18326   | -1.57474 | 5.88858  | L |
| H-H_   | -1 | 7.26791   | 2.16599  | 5.88269  | L |
| H-H_   | -1 | 7.29956   | -4.89609 | 5.90154  | L |
| C-C_2  | 0  | 1.17251   | -0.46314 | 1.75475  | H |
| C-C_2  | 0  | 0.63891   | -0.83768 | 0.58119  | H |
| H-H_   | 0  | 1.64137   | 0.50802  | 1.89365  | H |
| H-H_   | 0  | 1.10476   | -1.11129 | 2.62508  | H |
| H-H_   | 0  | 0.17483   | -1.81896 | 0.50431  | H |
| C-C_3  | 0  | 0.65258   | -0.03349 | -0.69063 | H |
| C-C_3  | 0  | -0.73017  | 0.04111  | -1.35979 | H |
| H-H_   | 0  | 1.34772   | -0.52126 | -1.38936 | H |
| H-H_   | 0  | 1.04082   | 0.97186  | -0.49781 | H |
| H-H_   | 0  | -0.66556  | 0.58526  | -2.30906 | H |
| H-H_   | 0  | -1.12487  | -0.95818 | -1.56912 | H |
| H-H_   | 0  | -1.45433  | 0.56243  | -0.72909 | H |
| Al-Al3 | 0  | 2.62114   | -4.02325 | 0.50948  | H |
| H-H_   | 0  | 2.78936   | -1.66805 | 0.84284  | H |

**S6. The coordinates for INT1 on HZSM-48**

|        |    |          |          |          |   |
|--------|----|----------|----------|----------|---|
| O-O_2  | -1 | -5.97438 | -1.97428 | -3.89564 | L |
| O-O_2  | -1 | -3.45925 | -2.50664 | -4.44428 | L |
| O-O_2  | -1 | -5.95227 | -6.30455 | -3.795   | L |
| Si-Si3 | -1 | -4.4501  | -1.54024 | -3.62311 | L |
| Si-Si3 | -1 | -4.56516 | -6.30018 | -4.61452 | L |
| O-O_2  | -1 | -1.34412 | 3.87136  | -4.44159 | L |
| Si-Si3 | -1 | -2.73122 | 3.86699  | -3.62207 | L |
| O-O_2  | -1 | -5.99217 | 1.90059  | -4.34181 | L |

|        |    |           |          |          |   |      |    |    |    |
|--------|----|-----------|----------|----------|---|------|----|----|----|
| O-O_2  | -1 | -3.48085  | 2.45546  | -3.79801 | L |      |    |    |    |
| Si-Si3 | -1 | -4.46458  | 1.48022  | -4.61728 | L |      |    |    |    |
| O-O_2  | -1 | -1.28674  | -8.23402 | -3.88601 | L |      |    |    |    |
| O-O_2  | -1 | -3.80292  | -7.70413 | -4.43225 | L |      |    |    |    |
| O-O_2  | -1 | -1.30868  | -3.90334 | -3.80484 | L |      |    |    |    |
| Si-Si3 | -1 | -2.8105   | -8.66682 | -3.60863 | L |      |    |    |    |
| Si-Si3 | -1 | -2.69735  | -3.9114  | -4.62168 | L |      |    |    |    |
| O-O_2  | -1 | -8.6133   | 1.88886  | -4.33928 | L |      |    |    |    |
| O-O_2  | -1 | 3.43326   | 2.48643  | -3.80468 | L |      |    |    |    |
| Si-Si3 | -1 | -10.13803 | 1.45481  | -4.61181 | L |      |    |    |    |
| O-O_2  | -1 | 1.33439   | -8.22228 | -3.88854 | L |      |    |    |    |
| O-O_2  | -1 | 1.31813   | -3.89158 | -3.80737 | L |      |    |    |    |
| Si-Si3 | -1 | 2.86294   | -8.64141 | -3.6141  | L |      |    |    |    |
| Si-Si3 | -1 | 2.70524   | -3.88721 | -4.62689 | L |      |    |    |    |
| O-O_2  | -1 | -8.59552  | -1.98602 | -3.89312 | L |      |    |    |    |
| O-O_2  | -1 | 3.45486   | -2.47567 | -4.45095 | L |      |    |    |    |
| Si-Si3 | -1 | -10.12354 | -1.56565 | -3.61765 | L |      |    |    |    |
| O-O_2  | -1 | 1.2827    | 3.88313  | -4.44413 | L |      |    |    |    |
| Si-Si3 | -1 | 2.67137   | 3.89119  | -3.62728 | L |      |    |    |    |
| O-O_2  | -1 | -7.27586  | -4.15485 | -4.56896 | L |      |    |    |    |
| Si-Si3 | -1 | -7.26926  | -5.41041 | -3.56118 | L |      |    |    |    |
| Si-Si3 | -1 | -7.28313  | -2.54615 | -4.63772 | L |      |    |    |    |
| Si-Si3 | -1 | -0.03518  | 4.77682  | -4.67946 | L |      |    |    |    |
| O-O_2  | -1 | -7.31183  | 4.07003  | -3.66597 | L |      |    |    |    |
| Si-Si3 | -1 | -7.30455  | 2.46133  | -3.5972  | L |      |    |    |    |
| O-O_2  | -1 | 0.01344   | -6.05652 | -4.57163 | L |      |    |    |    |
| Si-Si3 | -1 | 0.00876   | -4.79642 | -3.5695  | L | H-H_ | 95 | 0. | 0. |
| Si-Si3 | -1 | 0.02059   | -7.66551 | -4.63316 | L |      |    |    |    |
| O-O_2  | -1 | -4.21401  | -0.02892 | -4.12043 | L |      |    |    |    |
| O-O_2  | -1 | -10.37367 | -0.05651 | -4.11449 | L |      |    |    |    |
| O-O_2  | -1 | -3.63074  | -5.10456 | -4.07413 | L |      |    |    |    |
| O-O_2  | -1 | 1.31195   | 3.84986  | 0.29242  | L |      |    |    |    |
| Si-Si3 | -1 | 2.71188   | 3.88772  | -0.55504 | L |      |    |    |    |
| O-O_2  | -1 | -5.96651  | -1.95569 | 4.3615   | L |      |    |    |    |
| O-O_2  | -1 | -3.45137  | -2.48804 | 3.81286  | L |      |    |    |    |
| O-O_R  | -1 | -5.9444   | -6.28595 | 4.46189  | L |      |    |    |    |
| Si-Si3 | -1 | -4.44222  | -1.52164 | 4.63402  | L |      |    |    |    |
| Si-Si3 | -1 | -4.55729  | -6.28158 | 3.64237  | L |      |    |    |    |
| O-O_2  | -1 | -1.33624  | 3.88996  | 3.8153   | L |      |    |    |    |
| Si-Si3 | -1 | -2.72335  | 3.88559  | 4.63507  | L |      |    |    |    |
| O-O_2  | -1 | -8.592    | -1.97771 | -0.20225 | L |      |    |    |    |
| O-O_3  | 0  | 3.46162   | -2.29756 | 0.46943  | H |      |    |    |    |
| Si-Si3 | -1 | -10.12054 | -1.55858 | -0.47669 | L |      |    |    |    |
| O-O_2  | -1 | -5.98429  | 1.91919  | 3.91508  | L |      |    |    |    |

|        |    |           |          |          |   |      |     |    |    |
|--------|----|-----------|----------|----------|---|------|-----|----|----|
| O-O_2  | -1 | -3.47297  | 2.47406  | 4.45888  | L |      |     |    |    |
| Si-Si3 | -1 | -4.45671  | 1.49882  | 3.63961  | L |      |     |    |    |
| O-O_2  | -1 | 1.33791   | -8.21397 | -0.19767 | L |      |     |    |    |
| O-O_2  | 0  | 1.2117    | -3.78211 | -0.47028 | H |      |     |    |    |
| Si-Si3 | -1 | 2.86594   | -8.63434 | -0.47314 | L |      |     |    |    |
| O-O_2  | -1 | -8.60894  | 1.89914  | 0.22674  | L |      |     |    |    |
| O-O_2  | -1 | 3.43377   | 2.44825  | -0.37569 | L | H-H_ | 163 | 0. | 0. |
| Si-Si3 | -1 | -10.13314 | 1.46633  | 0.50413  | L |      |     |    |    |
| O-O_2  | -1 | -1.27887  | -8.21542 | 4.37113  | L |      |     |    |    |
| O-O_2  | -1 | -3.79505  | -7.68553 | 3.82489  | L |      |     |    |    |
| O-O_2  | -1 | -1.3008   | -3.88474 | 4.45206  | L |      |     |    |    |
| Si-Si3 | -1 | -2.80263  | -8.64822 | 4.64852  | L |      |     |    |    |
| Si-Si3 | -1 | -2.68947  | -3.8928  | 3.6352   | L |      |     |    |    |
| O-O_2  | -1 | -8.60542  | 1.90745  | 3.91761  | L |      |     |    |    |
| O-O_2  | -1 | 3.44114   | 2.50502  | 4.45221  | L |      |     |    |    |
| Si-Si3 | -1 | -10.13015 | 1.47341  | 3.64508  | L |      |     |    |    |
| O-O_2  | -1 | -1.28322  | -8.2257  | -0.19515 | L |      |     |    |    |
| O-O_2  | -1 | -3.79836  | -7.69335 | 0.35349  | L |      |     |    |    |
| O-O_2  | 0  | -1.40144  | -3.86134 | -0.36014 | H |      |     |    |    |
| Si-Si3 | -1 | -2.80751  | -8.65975 | -0.46767 | L |      |     |    |    |
| Si-Si3 | -1 | -2.74963  | -3.91773 | 0.56113  | H |      |     |    |    |
| O-O_2  | -1 | -5.98781  | 1.91088  | 0.22422  | L |      |     |    |    |
| O-O_2  | -1 | -3.47754  | 2.46328  | -0.32687 | L |      |     |    |    |
| Si-Si3 | -1 | -4.481    | 1.48075  | 0.50002  | L |      |     |    |    |
| O-O_2  | -1 | 1.34227   | -8.20368 | 4.3686   | L |      |     |    |    |
| O-O_2  | -1 | 1.32601   | -3.87298 | 4.44952  | L | H-H_ | 80  | 0. | 0. |
| Si-Si3 | -1 | 2.87081   | -8.62282 | 4.64305  | L |      |     |    |    |
| Si-Si3 | 0  | 2.71312   | -3.8686  | 3.63001  | H |      |     |    |    |
| O-O_2  | -1 | -1.34468  | 3.84345  | 0.28372  | L |      |     |    |    |
| Si-Si3 | -1 | -2.75707  | 3.87568  | -0.5464  | L |      |     |    |    |
| O-O_2  | -1 | -8.58764  | -1.96743 | 4.36402  | L |      |     |    |    |
| O-O_2  | -1 | 3.46274   | -2.45707 | 3.80619  | L | H-H_ | 80  | 0. | 0. |
| Si-Si3 | -1 | -10.11566 | -1.54705 | 4.63949  | L |      |     |    |    |
| O-O_2  | -1 | 1.29057   | 3.90173  | 3.81277  | L |      |     |    |    |
| Si-Si3 | -1 | 2.67924   | 3.90979  | 4.62986  | L |      |     |    |    |
| O-O_2  | -1 | -6.08416  | -1.8723  | -0.39229 | L |      |     |    |    |
| O-O_2  | -1 | -3.60323  | -2.51667 | 0.48651  | L | H-H_ | 73  | 0. | 0. |
| O-O_R  | -1 | -5.94892  | -6.29664 | -0.2857  | L |      |     |    |    |
| Si-Si3 | -1 | -4.50172  | -1.5615  | -0.49395 | L |      |     |    |    |
| Si-Si3 | -1 | -4.56025  | -6.28859 | 0.53114  | L |      |     |    |    |
| O-O_R  | -1 | -7.2702   | -4.87436 | -2.04235 | L |      |     |    |    |
| O-O_2  | -1 | -7.30961  | 4.80814  | 2.06439  | L |      |     |    |    |
| O-O_2  | -1 | -0.03782  | -5.5026  | -2.06961 | H |      |     |    |    |
| O-O_2  | -1 | -7.27885  | -2.05567 | 2.07983  | L |      |     |    |    |

|        |    |           |          |          |   |      |     |    |    |
|--------|----|-----------|----------|----------|---|------|-----|----|----|
| O-O_2  | -1 | -7.30096  | 1.98945  | -2.05778 | L |      |     |    |    |
| O-O_2  | -1 | 0.02913   | -8.12572 | 2.08653  | L |      |     |    |    |
| O-O_2  | -1 | -3.98872  | -1.7521  | -2.03159 | L |      |     |    |    |
| O-O_2  | -1 | -10.45046 | -1.6812  | -2.04651 | L |      |     |    |    |
| O-O_2  | -1 | -4.12978  | 1.61498  | 2.06855  | L |      |     |    |    |
| O-O_2  | -1 | 3.19286   | -8.51879 | -2.04412 | L |      |     |    |    |
| O-O_2  | -1 | -10.46113 | 1.58662  | 2.07466  | L |      |     |    |    |
| O-O_2  | -1 | -3.13849  | -8.54714 | -2.03801 | L |      |     |    |    |
| O-O_2  | -1 | 2.34844   | 4.14737  | -2.07184 | L |      |     |    |    |
| O-O_2  | -1 | -4.88318  | -6.03302 | 2.0865   | L |      |     |    |    |
| O-O_2  | -1 | -2.40761  | 4.12607  | -2.06726 | L |      |     |    |    |
| O-O_2  | 0  | 2.22866   | -4.14452 | 2.13262  | H |      |     |    |    |
| O-O_2  | -1 | -2.24564  | -4.21334 | 2.07366  | L | H-H_ | 73  | 0. | 0. |
| Si-Si3 | -1 | -0.0258   | 4.76756  | 0.55282  | L |      |     |    |    |
| O-O_R  | -1 | -7.26798  | -4.13625 | 3.68793  | L |      |     |    |    |
| Si-    | -1 | -7.26139  | -5.39181 | 4.69572  | L |      |     |    |    |
| Si-Si3 | -1 | -7.27526  | -2.52755 | 3.61917  | L |      |     |    |    |
| Si-Si3 | -1 | -0.02731  | 4.79542  | 3.57768  | L |      |     |    |    |
| O-O_R  | -1 | -7.27104  | -4.14347 | 0.48109  | L |      |     |    |    |
| Si-    | -1 | -7.26637  | -5.40356 | -0.52104 | L |      |     |    |    |
| Si-Si3 | -1 | -7.27819  | -2.53447 | 0.54262  | L |      |     |    |    |
| O-O_2  | -1 | -7.30395  | 4.08863  | 4.59093  | L |      |     |    |    |
| Si-Si3 | -1 | -7.29668  | 2.47993  | 4.65994  | L |      |     |    |    |
| O-O_2  | -1 | 0.00666   | -5.98223 | 0.54898  | H |      |     |    |    |
| Si-Si3 | 0  | -0.04282  | -4.79033 | -0.60047 | H |      |     |    |    |
| Si-Si3 | -1 | 0.02553   | -7.65383 | 0.54718  | L | H-H_ | 120 | 0. | 0. |
| O-O_2  | -1 | -7.30877  | 4.07725  | -0.45888 | L |      |     |    |    |
| Si-Si3 | -1 | -7.30162  | 2.46826  | -0.52065 | L |      |     |    |    |
| O-O_2  | -1 | 0.02132   | -6.03792 | 3.68526  | L |      |     |    |    |
| Si-Si3 | -1 | 0.01664   | -4.77783 | 4.68739  | L |      |     |    |    |
| Si-Si3 | -1 | 0.02846   | -7.64691 | 3.62373  | L |      |     |    |    |
| O-O_2  | -1 | -4.20613  | -0.01032 | 4.13646  | L |      |     |    |    |
| O-O_2  | -1 | -10.36974 | -0.04721 | 0.01408  | L |      |     |    |    |
| O-O_2  | -1 | -10.3658  | -0.03791 | 4.1424   | L |      |     |    |    |
| O-O_2  | -1 | -4.22151  | -0.03194 | -0.01742 | L |      |     |    |    |
| O-O_2  | -1 | -3.62286  | -5.08597 | 4.18301  | L |      |     |    |    |
| O-O_2  | -1 | -3.64994  | -5.08836 | -0.13674 | L | H-H_ | 73  | 0. | 0. |
| O-O_2  | -1 | 8.58732   | -1.90907 | -3.90968 | L |      |     |    |    |
| Si-Si3 | -1 | 10.11161  | -1.47502 | -3.63715 | L |      |     |    |    |
| O-O_2  | -1 | 8.56953   | 1.96581  | -4.35585 | L |      |     |    |    |
| Si-Si3 | -1 | 10.09712  | 1.54544  | -4.63132 | L |      |     |    |    |
| O-O_2  | -1 | 5.9484    | 1.95407  | -4.35332 | L |      |     |    |    |
| Si-Si3 | -1 | 4.42411   | 1.52003  | -4.62585 | L |      |     |    |    |
| O-O_2  | -1 | 3.8451    | -7.66988 | -4.43962 | L |      |     |    |    |

|        |    |          |          |          |   |      |     |    |    |
|--------|----|----------|----------|----------|---|------|-----|----|----|
| O-O_2  | -1 | 5.96619  | -1.92081 | -3.90715 | L |      |     |    |    |
| O-O_2  | -1 | 5.98262  | -6.2511  | -3.8065  | L |      |     |    |    |
| Si-Si3 | -1 | 4.43861  | -1.50043 | -3.63171 | L | H-H_ | 180 | 0. | 0. |
| Si-Si3 | -1 | 4.59438  | -6.25915 | -4.62335 | L |      |     |    |    |
| O-O_2  | -1 | 7.28584  | -4.08963 | -4.583   | L |      |     |    |    |
| Si-Si3 | -1 | 7.29244  | -5.34519 | -3.57521 | L |      |     |    |    |
| Si-Si3 | -1 | 7.27857  | -2.48093 | -4.65176 | L |      |     |    |    |
| O-O_2  | -1 | 7.24988  | 4.13525  | -3.68    | L |      |     |    |    |
| Si-Si3 | -1 | 7.25715  | 2.52654  | -3.61124 | L |      |     |    |    |
| O-O_2  | -1 | 10.34769 | 0.0363   | -4.13447 | L |      |     |    |    |
| O-O_2  | -1 | 4.18803  | 0.00871  | -4.12853 | L |      |     |    |    |
| O-O_2  | -1 | 3.65019  | -5.07195 | -4.08115 | L |      |     |    |    |
| O-O_2  | -1 | 8.5952   | -1.89047 | 4.34746  | L |      |     |    |    |
| Si-Si3 | -1 | 10.11948 | -1.45642 | 4.61999  | L |      |     |    |    |
| O-O_2  | -1 | 6.06404  | -1.85361 | -0.39998 | H |      |     |    |    |
| O-O_2  | -1 | 5.98597  | -6.24319 | -0.29721 | L |      |     |    |    |
| Si-Si3 | 0  | 4.52093  | -1.46397 | -0.54527 | H |      |     |    |    |
| Si-Si3 | -1 | 4.59928  | -6.24755 | 0.52231  | L | H-H_ | 198 | 0. | 0. |
| O-O_2  | -1 | 8.57741  | 1.98441  | 3.90105  | L |      |     |    |    |
| Si-Si3 | -1 | 10.105   | 1.56403  | 3.62558  | L |      |     |    |    |
| O-O_2  | -1 | 3.84967  | -7.6591  | 0.34612  | L |      |     |    |    |
| O-O_2  | -1 | 5.95276  | 1.96431  | 0.21271  | L | H-H_ | 163 | 0. | 0. |
| Si-Si3 | -1 | 4.45654  | 1.54611  | 0.49373  | H |      |     |    |    |
| O-O_2  | -1 | 5.95628  | 1.97267  | 3.90357  | L |      |     |    |    |
| Si-Si3 | -1 | 4.43199  | 1.53863  | 3.63105  | L |      |     |    |    |
| O-O_2  | -1 | 8.57389  | 1.9761   | 0.21018  | L |      |     |    |    |
| Si-Si3 | -1 | 10.102   | 1.55696  | 0.48462  | L |      |     |    |    |
| O-O_2  | -1 | 3.85298  | -7.65128 | 3.81752  | L |      |     |    |    |
| O-O_2  | -1 | 5.97406  | -1.90221 | 4.34999  | L |      |     |    |    |
| O-O_2  | -1 | 5.9905   | -6.2325  | 4.45039  | L |      |     |    |    |
| Si-Si3 | -1 | 4.44648  | -1.48183 | 4.62546  | L |      |     |    |    |
| Si-Si3 | -1 | 4.60226  | -6.24056 | 3.63354  | L |      |     |    |    |
| O-O_2  | -1 | 8.59084  | -1.90075 | -0.21881 | L |      |     |    |    |
| Si-Si3 | -1 | 10.1146  | -1.46795 | -0.4962  | L |      |     |    |    |
| O-O_2  | -1 | 7.2915   | -4.80914 | -2.05638 | L |      |     |    |    |
| O-O_2  | -1 | 7.25209  | 4.87336  | 2.05036  | L |      |     |    |    |
| O-O_2  | -1 | 7.28285  | -1.99045 | 2.06579  | L |      |     |    |    |
| O-O_2  | -1 | 7.26075  | 2.05467  | -2.07181 | L |      |     |    |    |
| O-O_2  | -1 | 10.44302 | -1.58763 | -2.06665 | L |      |     |    |    |
| O-O_2  | -1 | 3.98214  | -1.71211 | -2.04598 | H |      |     |    |    |
| O-O_2  | -1 | 10.43236 | 1.6802   | 2.05452  | L |      |     |    |    |
| O-O_2  | -1 | 4.10057  | 1.65185  | 2.06063  | L | H-H_ | 163 | 0. | 0. |
| O-O_2  | -1 | 4.92292  | -5.9891  | 2.07705  | L |      |     |    |    |
| O-O_2  | -1 | 7.29372  | -4.07103 | 3.6739   | L |      |     |    |    |

|        |    |          |          |          |   |      |     |    |    |
|--------|----|----------|----------|----------|---|------|-----|----|----|
| Si-Si3 | -1 | 7.30031  | -5.3266  | 4.68168  | L |      |     |    |    |
| Si-Si3 | -1 | 7.28645  | -2.46233 | 3.60513  | L |      |     |    |    |
| O-O_2  | -1 | 7.29066  | -4.07826 | 0.46705  | L |      |     |    |    |
| Si-Si3 | -1 | 7.29534  | -5.33835 | -0.53508 | L |      |     |    |    |
| Si-Si3 | -1 | 7.28351  | -2.46926 | 0.52858  | L | H-H_ | 155 | 0. | 0. |
| O-O_2  | -1 | 7.25775  | 4.15385  | 4.57689  | L |      |     |    |    |
| Si-Si3 | -1 | 7.26502  | 2.54514  | 4.6459   | L |      |     |    |    |
| O-O_2  | -1 | 7.25293  | 4.14247  | -0.47291 | L |      |     |    |    |
| Si-Si3 | -1 | 7.26007  | 2.5335   | -0.53469 | L |      |     |    |    |
| O-O_2  | -1 | 10.35557 | 0.0549   | 4.12242  | L |      |     |    |    |
| O-O_2  | 0  | 4.24006  | 0.0359   | -0.04362 | H |      |     |    |    |
| O-O_2  | -1 | 4.1959   | 0.02731  | 4.12836  | L |      |     |    |    |
| O-O_2  | -1 | 10.35163 | 0.0456   | -0.0059  | L |      |     |    |    |
| O-O_2  | 0  | 3.75852  | -5.0662  | -0.16924 | H |      |     |    |    |
| O-O_2  | -1 | 3.65806  | -5.05336 | 4.17599  | L | H-H_ | 80  | 0. | 0. |
| O-O_2  | -1 | -1.36081 | 8.20267  | -4.36042 | L |      |     |    |    |
| O-O_2  | -1 | -3.87109 | 7.65028  | -3.80934 | L |      |     |    |    |
| Si-Si3 | -1 | -2.88892 | 8.62181  | -4.63487 | L |      |     |    |    |
| O-O_2  | -1 | -6.00904 | 6.2315   | -4.44246 | L |      |     |    |    |
| Si-Si3 | -1 | -4.62037 | 6.23955  | -3.62561 | L |      |     |    |    |
| O-O_2  | -1 | 1.26032  | 8.21442  | -4.36295 | L |      |     |    |    |
| Si-Si3 | -1 | 2.78452  | 8.64722  | -4.64034 | L |      |     |    |    |
| O-O_2  | -1 | -0.03986 | 6.0363   | -3.67733 | L |      |     |    |    |
| Si-Si3 | -1 | -0.04701 | 7.6453   | -3.6158  | L |      |     |    |    |
| Si-Si3 | -1 | -7.31842 | 5.32498  | -4.67375 | L |      |     |    |    |
| O-O_2  | -1 | -3.67632 | 5.05215  | -4.16781 | L |      |     |    |    |
| O-O_2  | -1 | 1.26468  | 8.2247   | 0.20308  | L |      |     |    |    |
| Si-Si3 | -1 | 2.7894   | 8.65874  | 0.4756   | L |      |     |    |    |
| O-O_2  | -1 | -1.35294 | 8.22127  | 3.89647  | L |      |     |    |    |
| O-O_2  | -1 | -3.86322 | 7.66887  | 4.44755  | L |      |     |    |    |
| Si-Si3 | -1 | -2.88105 | 8.64041  | 3.62203  | L |      |     |    |    |
| O-O_2  | -1 | -6.00117 | 6.25009  | 3.81443  | L |      |     |    |    |
| Si-Si3 | -1 | -4.61249 | 6.25815  | 4.63153  | L |      |     |    |    |
| O-O_2  | -1 | -6.00451 | 6.24219  | 0.30539  | L |      |     |    |    |
| Si-Si3 | -1 | -4.6174  | 6.24656  | -0.51439 | L |      |     |    |    |
| O-O_2  | -1 | -1.35646 | 8.21296  | 0.2056   | L |      |     |    |    |
| O-O_2  | -1 | -3.86778 | 7.65809  | -0.33819 | L |      |     |    |    |
| Si-Si3 | -1 | -2.88404 | 8.63333  | 0.48107  | L |      |     |    |    |
| O-O_2  | -1 | 1.2682   | 8.23301  | 3.89394  | L |      |     |    |    |
| Si-Si3 | -1 | 2.7924   | 8.66582  | 3.61656  | L |      |     |    |    |
| O-O_2  | -1 | -0.03114 | 5.32401  | 2.05629  | L |      |     |    |    |
| O-O_2  | -1 | -0.04767 | 8.1241   | -2.07851 | L |      |     |    |    |
| O-O_2  | -1 | 3.12038  | 8.54614  | 2.04603  | L |      |     |    |    |
| O-O_2  | -1 | -3.21097 | 8.51778  | 2.05213  | L |      |     |    |    |



|        |    |           |         |          |   |
|--------|----|-----------|---------|----------|---|
| O-O_2  | -1 | -4.94102  | 5.98748 | -2.06903 | L |
| O-O_2  | -1 | -0.0368   | 6.04353 | -0.47024 | L |
| Si-Si3 | -1 | -0.04407  | 7.65223 | -0.53925 | L |
| O-O_2  | -1 | -0.03198  | 6.0549  | 4.57956  | L |
| Si-Si3 | -1 | -0.03913  | 7.6639  | 4.64134  | L |
| Si-Si3 | -1 | -7.31054  | 5.34358 | 3.58339  | L |
| Si-Si3 | -1 | -7.31344  | 5.33673 | 0.54301  | L |
| O-O_2  | -1 | -3.66844  | 5.07075 | 4.08908  | L |
| O-O_2  | -1 | -3.67231  | 5.06161 | 0.0316   | L |
| O-O_2  | -1 | 5.92585   | 6.28495 | -4.45396 | L |
| Si-Si3 | -1 | 4.53918   | 6.28057 | -3.63444 | L |
| O-O_2  | -1 | 3.77694   | 7.68453 | -3.81672 | L |
| Si-Si3 | -1 | 7.24328   | 5.3902  | -4.68779 | L |
| O-O_2  | -1 | 3.60461   | 5.08476 | -4.17483 | L |
| O-O_2  | -1 | 3.78025   | 7.69235 | -0.34557 | L |
| O-O_2  | -1 | 5.93038   | 6.29564 | 0.29388  | L |
| Si-Si3 | -1 | 4.54214   | 6.28758 | -0.52322 | L |
| O-O_2  | -1 | 5.93373   | 6.30354 | 3.80293  | L |
| Si-Si3 | -1 | 4.54705   | 6.29917 | 4.6227   | L |
| O-O_2  | -1 | 3.78481   | 7.70312 | 4.44018  | L |
| O-O_2  | -1 | 4.86507   | 6.0314  | -2.07849 | L |
| Si-Si3 | -1 | 7.25116   | 5.4088  | 3.56935  | L |
| Si-Si3 | -1 | 7.24826   | 5.40195 | 0.52897  | L |
| O-O_2  | -1 | 3.60861   | 5.09422 | 0.02458  | L |
| O-O_2  | -1 | 3.61248   | 5.10336 | 4.08206  | L |
| H-H_   | -1 | -3.08969  | 9.83732 | -4.24037 | L |
| H-H_   | -1 | -3.08556  | 9.84706 | 0.08148  | L |
| H-H_   | -1 | -3.08181  | 9.85592 | 4.01652  | L |
| H-H_   | -1 | 2.9748    | 9.86453 | -4.2462  | L |
| H-H_   | -1 | 2.97892   | 9.87427 | 0.07562  | L |
| H-H_   | -1 | 2.98268   | 9.88313 | 4.0107   | L |
| H-H_   | -1 | 8.29594   | 6.11874 | -4.50191 | L |
| H-H_   | -1 | 8.30058   | 6.12965 | 0.338    | L |
| H-H_   | -1 | 8.30384   | 6.13735 | 3.75504  | L |
| H-H_   | -1 | 10.88785  | 2.32933 | -3.97279 | L |
| H-H_   | -1 | 10.89147  | 2.33788 | -0.17893 | L |
| H-H_   | -1 | 10.89572  | 2.34793 | 4.2841   | L |
| H-H_   | -1 | 10.3603   | 1.63883 | -5.89441 | L |
| H-H_   | -1 | -8.3772   | 6.04406 | -4.48583 | L |
| H-H_   | -1 | -8.37261  | 6.05498 | 0.35407  | L |
| H-H_   | -1 | -8.36935  | 6.06268 | 3.77111  | L |
| H-H_   | -1 | -10.93447 | 2.2316  | -3.95176 | L |
| H-H_   | -1 | -10.93085 | 2.24014 | -0.1579  | L |
| H-H_   | -1 | -10.92659 | 2.2502  | 4.30514  | L |

|      |    |           |          |          |   |
|------|----|-----------|----------|----------|---|
| H-H_ | -1 | -10.37854 | -1.63996 | 5.90269  | L |
| H-H_ | -1 | -10.90639 | -2.33095 | 3.98097  | L |
| H-H_ | -1 | -10.91001 | -2.3395  | 0.18687  | L |
| H-H_ | -1 | -10.91427 | -2.34955 | -4.27617 | L |
| H-H_ | -1 | -8.32215  | -6.13861 | -3.7471  | L |
| H-H_ | -1 | 10.90805  | -2.25181 | -4.29721 | L |
| H-H_ | -1 | 10.91231  | -2.24176 | 0.16583  | L |
| H-H_ | -1 | 10.91593  | -2.23321 | 3.95994  | L |
| H-H_ | -1 | 10.38595  | -1.54696 | 5.8826   | L |
| H-H_ | -1 | 8.35144   | -6.06393 | -3.76317 | L |
| H-H_ | -1 | 8.3547    | -6.05624 | -0.3459  | L |
| H-H_ | -1 | 8.35931   | -6.04534 | 4.49372  | L |
| H-H_ | -1 | 3.07123   | -9.83832 | 4.24835  | L |
| H-H_ | -1 | 3.1361    | -8.52421 | 5.90531  | L |
| H-H_ | -1 | -2.99325  | -9.86543 | 4.25421  | L |
| H-H_ | -1 | -3.06635  | -8.55199 | 5.91129  | L |
| H-H_ | -1 | -2.99737  | -9.87516 | -0.06753 | L |
| H-H_ | -1 | -3.00113  | -9.88409 | -4.00275 | L |
| H-H_ | -1 | 3.0671    | -9.84805 | -0.07336 | L |
| H-H_ | -1 | 3.06336   | -9.85698 | -4.00861 | L |
| H-H_ | -1 | 4.85218   | -6.05699 | -5.87478 | L |
| H-H_ | -1 | 7.27568   | -2.10182 | -5.88856 | L |
| H-H_ | -1 | 0.02112   | -8.05019 | -5.86824 | L |
| H-H_ | -1 | 2.44506   | -4.095   | -5.8769  | L |
| H-H_ | -1 | 7.24403   | 4.9601   | -5.9078  | L |
| H-H_ | -1 | 4.15768   | 1.61105  | -5.88844 | L |
| H-H_ | -1 | -2.43773  | -4.11687 | -5.87219 | L |
| H-H_ | -1 | -4.82717  | -6.10034 | -5.86545 | L |
| H-H_ | -1 | 3.04821   | 8.551    | -5.90311 | L |
| H-H_ | -1 | -0.03826  | 5.20141  | -5.90139 | L |
| H-H_ | -1 | -7.28602  | -2.16703 | -5.87452 | L |
| H-H_ | -1 | -4.20174  | 1.57361  | -5.88045 | L |
| H-H_ | -1 | -3.15418  | 8.52322  | -5.89714 | L |
| H-H_ | -1 | -7.31767  | 4.89489  | -5.89376 | L |
| H-H_ | -1 | -10.40413 | 1.54583  | -5.87447 | L |
| H-H_ | -1 | -7.29379  | 2.10078  | 5.89672  | L |
| H-H_ | -1 | -4.8703   | 6.05549  | 5.88287  | L |
| H-H_ | -1 | -0.03966  | 8.04861  | 5.87641  | L |
| H-H_ | -1 | -2.46316  | 4.09389  | 5.885    | L |
| H-H_ | -1 | -7.26214  | -4.9613  | 5.91558  | L |
| H-H_ | -1 | -4.17609  | -1.61219 | 5.89671  | L |
| H-H_ | -1 | 2.41961   | 4.11576  | 5.88029  | L |
| H-H_ | -1 | 4.80907   | 6.09884  | 5.87354  | L |
| H-H_ | -1 | 0.01972   | -5.20284 | 5.90918  | L |

|        |    |          |          |          |   |
|--------|----|----------|----------|----------|---|
| H-H_   | -1 | 4.18326  | -1.57474 | 5.88858  | L |
| H-H_   | -1 | 7.26791  | 2.16599  | 5.88269  | L |
| H-H_   | -1 | 7.29956  | -4.89609 | 5.90154  | L |
| Al-Al3 | 0  | 2.62114  | -4.02325 | 0.50948  | H |
| H-H_   | 0  | -1.04385 | -1.74668 | 0.89336  | H |
| C-C_3  | 0  | 0.03439  | -1.75508 | 1.04879  | H |
| C-C_3  | 0  | 0.81615  | -2.08038 | -0.21987 | H |
| H-H_   | 0  | 0.33182  | -0.75647 | 1.38408  | H |
| H-H_   | 0  | 0.29306  | -2.46398 | 1.83797  | H |
| H-H_   | 0  | 1.81427  | -1.67133 | -0.10678 | H |
| C-C_3  | 0  | 0.24865  | -1.55221 | -1.53134 | H |
| C-C_3  | 0  | 0.16262  | -0.01664 | -1.51927 | H |
| H-H_   | 0  | -0.74015 | -1.97689 | -1.72859 | H |
| H-H_   | 0  | 0.9331   | -1.85123 | -2.33059 | H |
| H-H_   | 0  | -0.1468  | 0.34762  | -2.50413 | H |
| H-H_   | 0  | -0.56803 | 0.34934  | -0.7924  | H |
| H-H_   | 0  | 1.13239  | 0.43531  | -1.28487 | H |

#### S7. The coordinates for INT2 on HZSM-48

|        |    |           |          |          |   |
|--------|----|-----------|----------|----------|---|
| O-O_2  | -1 | -5.97438  | -1.97428 | -3.89564 | L |
| O-O_2  | -1 | -3.45925  | -2.50664 | -4.44428 | L |
| O-O_2  | -1 | -5.95227  | -6.30455 | -3.795   | L |
| Si-Si3 | -1 | -4.4501   | -1.54024 | -3.62311 | L |
| Si-Si3 | -1 | -4.56516  | -6.30018 | -4.61452 | L |
| O-O_2  | -1 | -1.34412  | 3.87136  | -4.44159 | L |
| Si-Si3 | -1 | -2.73122  | 3.86699  | -3.62207 | L |
| O-O_2  | -1 | -5.99217  | 1.90059  | -4.34181 | L |
| O-O_2  | -1 | -3.48085  | 2.45546  | -3.79801 | L |
| Si-Si3 | -1 | -4.46458  | 1.48022  | -4.61728 | L |
| O-O_2  | -1 | -1.28674  | -8.23402 | -3.88601 | L |
| O-O_2  | -1 | -3.80292  | -7.70413 | -4.43225 | L |
| O-O_2  | -1 | -1.30868  | -3.90334 | -3.80484 | L |
| Si-Si3 | -1 | -2.8105   | -8.66682 | -3.60863 | L |
| Si-Si3 | -1 | -2.69735  | -3.9114  | -4.62168 | L |
| O-O_2  | -1 | -8.6133   | 1.88886  | -4.33928 | L |
| O-O_2  | -1 | 3.43326   | 2.48643  | -3.80468 | L |
| Si-Si3 | -1 | -10.13803 | 1.45481  | -4.61181 | L |
| O-O_2  | -1 | 1.33439   | -8.22228 | -3.88854 | L |
| O-O_2  | -1 | 1.31813   | -3.89158 | -3.80737 | L |
| Si-Si3 | -1 | 2.86294   | -8.64141 | -3.6141  | L |
| Si-Si3 | -1 | 2.70524   | -3.88721 | -4.62689 | L |
| O-O_2  | -1 | -8.59552  | -1.98602 | -3.89312 | L |
| O-O_2  | -1 | 3.45486   | -2.47567 | -4.45095 | L |
| Si-Si3 | -1 | -10.12354 | -1.56565 | -3.61765 | L |

|        |    |           |          |          |   |      |     |    |    |
|--------|----|-----------|----------|----------|---|------|-----|----|----|
| O-O_2  | -1 | 1.2827    | 3.88313  | -4.44413 | L |      |     |    |    |
| Si-Si3 | -1 | 2.67137   | 3.89119  | -3.62728 | L |      |     |    |    |
| O-O_2  | -1 | -7.27586  | -4.15485 | -4.56896 | L |      |     |    |    |
| Si-Si3 | -1 | -7.26926  | -5.41041 | -3.56118 | L |      |     |    |    |
| Si-Si3 | -1 | -7.28313  | -2.54615 | -4.63772 | L |      |     |    |    |
| Si-Si3 | -1 | -0.03518  | 4.77682  | -4.67946 | L |      |     |    |    |
| O-O_2  | -1 | -7.31183  | 4.07003  | -3.66597 | L |      |     |    |    |
| Si-Si3 | -1 | -7.30455  | 2.46133  | -3.5972  | L |      |     |    |    |
| O-O_2  | -1 | 0.01344   | -6.05652 | -4.57163 | L |      |     |    |    |
| Si-Si3 | -1 | 0.00876   | -4.79642 | -3.5695  | L | H-H_ | 95  | 0. | 0. |
| Si-Si3 | -1 | 0.02059   | -7.66551 | -4.63316 | L |      |     |    |    |
| O-O_2  | -1 | -4.21401  | -0.02892 | -4.12043 | L |      |     |    |    |
| O-O_2  | -1 | -10.37367 | -0.05651 | -4.11449 | L |      |     |    |    |
| O-O_2  | -1 | -3.63074  | -5.10456 | -4.07413 | L |      |     |    |    |
| O-O_2  | -1 | 1.31195   | 3.84986  | 0.29242  | L |      |     |    |    |
| Si-Si3 | -1 | 2.71188   | 3.88772  | -0.55504 | L |      |     |    |    |
| O-O_2  | -1 | -5.96651  | -1.95569 | 4.3615   | L |      |     |    |    |
| O-O_2  | -1 | -3.45137  | -2.48804 | 3.81286  | L |      |     |    |    |
| O-O_R  | -1 | -5.9444   | -6.28595 | 4.46189  | L |      |     |    |    |
| Si-Si3 | -1 | -4.44222  | -1.52164 | 4.63402  | L |      |     |    |    |
| Si-Si3 | -1 | -4.55729  | -6.28158 | 3.64237  | L |      |     |    |    |
| O-O_2  | -1 | -1.33624  | 3.88996  | 3.8153   | L |      |     |    |    |
| Si-Si3 | -1 | -2.72335  | 3.88559  | 4.63507  | L |      |     |    |    |
| O-O_2  | -1 | -8.592    | -1.97771 | -0.20225 | L |      |     |    |    |
| O-O_3  | 0  | 3.46162   | -2.29756 | 0.46943  | H |      |     |    |    |
| Si-Si3 | -1 | -10.12054 | -1.55858 | -0.47669 | L |      |     |    |    |
| O-O_2  | -1 | -5.98429  | 1.91919  | 3.91508  | L |      |     |    |    |
| O-O_2  | -1 | -3.47297  | 2.47406  | 4.45888  | L |      |     |    |    |
| Si-Si3 | -1 | -4.45671  | 1.49882  | 3.63961  | L |      |     |    |    |
| O-O_2  | -1 | 1.33791   | -8.21397 | -0.19767 | L |      |     |    |    |
| O-O_2  | 0  | 1.2117    | -3.78211 | -0.47028 | H |      |     |    |    |
| Si-Si3 | -1 | 2.86594   | -8.63434 | -0.47314 | L |      |     |    |    |
| O-O_2  | -1 | -8.60894  | 1.89914  | 0.22674  | L |      |     |    |    |
| O-O_2  | -1 | 3.43377   | 2.44825  | -0.37569 | L | H-H_ | 163 | 0. | 0. |
| Si-Si3 | -1 | -10.13314 | 1.46633  | 0.50413  | L |      |     |    |    |
| O-O_2  | -1 | -1.27887  | -8.21542 | 4.37113  | L |      |     |    |    |
| O-O_2  | -1 | -3.79505  | -7.68553 | 3.82489  | L |      |     |    |    |
| O-O_2  | -1 | -1.3008   | -3.88474 | 4.45206  | L |      |     |    |    |
| Si-Si3 | -1 | -2.80263  | -8.64822 | 4.64852  | L |      |     |    |    |
| Si-Si3 | -1 | -2.68947  | -3.8928  | 3.6352   | L |      |     |    |    |
| O-O_2  | -1 | -8.60542  | 1.90745  | 3.91761  | L |      |     |    |    |
| O-O_2  | -1 | 3.44114   | 2.50502  | 4.45221  | L |      |     |    |    |
| Si-Si3 | -1 | -10.13015 | 1.47341  | 3.64508  | L |      |     |    |    |
| O-O_2  | -1 | -1.28322  | -8.2257  | -0.19515 | L |      |     |    |    |

|        |    |           |          |          |   |      |    |    |    |
|--------|----|-----------|----------|----------|---|------|----|----|----|
| O-O_2  | -1 | -3.79836  | -7.69335 | 0.35349  | L |      |    |    |    |
| O-O_2  | 0  | -1.40144  | -3.86134 | -0.36014 | H |      |    |    |    |
| Si-Si3 | -1 | -2.80751  | -8.65975 | -0.46767 | L |      |    |    |    |
| Si-Si3 | -1 | -2.74963  | -3.91773 | 0.56113  | H |      |    |    |    |
| O-O_2  | -1 | -5.98781  | 1.91088  | 0.22422  | L |      |    |    |    |
| O-O_2  | -1 | -3.47754  | 2.46328  | -0.32687 | L |      |    |    |    |
| Si-Si3 | -1 | -4.481    | 1.48075  | 0.50002  | L |      |    |    |    |
| O-O_2  | -1 | 1.34227   | -8.20368 | 4.3686   | L |      |    |    |    |
| O-O_2  | -1 | 1.32601   | -3.87298 | 4.44952  | L | H-H_ | 80 | 0. | 0. |
| Si-Si3 | -1 | 2.87081   | -8.62282 | 4.64305  | L |      |    |    |    |
| Si-Si3 | 0  | 2.71312   | -3.8686  | 3.63001  | H |      |    |    |    |
| O-O_2  | -1 | -1.34468  | 3.84345  | 0.28372  | L |      |    |    |    |
| Si-Si3 | -1 | -2.75707  | 3.87568  | -0.5464  | L |      |    |    |    |
| O-O_2  | -1 | -8.58764  | -1.96743 | 4.36402  | L |      |    |    |    |
| O-O_2  | -1 | 3.46274   | -2.45707 | 3.80619  | L | H-H_ | 80 | 0. | 0. |
| Si-Si3 | -1 | -10.11566 | -1.54705 | 4.63949  | L |      |    |    |    |
| O-O_2  | -1 | 1.29057   | 3.90173  | 3.81277  | L |      |    |    |    |
| Si-Si3 | -1 | 2.67924   | 3.90979  | 4.62986  | L |      |    |    |    |
| O-O_2  | -1 | -6.08416  | -1.8723  | -0.39229 | L |      |    |    |    |
| O-O_2  | -1 | -3.60323  | -2.51667 | 0.48651  | L | H-H_ | 73 | 0. | 0. |
| O-O_R  | -1 | -5.94892  | -6.29664 | -0.2857  | L |      |    |    |    |
| Si-Si3 | -1 | -4.50172  | -1.5615  | -0.49395 | L |      |    |    |    |
| Si-Si3 | -1 | -4.56025  | -6.28859 | 0.53114  | L |      |    |    |    |
| O-O_R  | -1 | -7.2702   | -4.87436 | -2.04235 | L |      |    |    |    |
| O-O_2  | -1 | -7.30961  | 4.80814  | 2.06439  | L |      |    |    |    |
| O-O_2  | -1 | -0.03782  | -5.5026  | -2.06961 | H |      |    |    |    |
| O-O_2  | -1 | -7.27885  | -2.05567 | 2.07983  | L |      |    |    |    |
| O-O_2  | -1 | -7.30096  | 1.98945  | -2.05778 | L |      |    |    |    |
| O-O_2  | -1 | 0.02913   | -8.12572 | 2.08653  | L |      |    |    |    |
| O-O_2  | -1 | -3.98872  | -1.7521  | -2.03159 | L |      |    |    |    |
| O-O_2  | -1 | -10.45046 | -1.6812  | -2.04651 | L |      |    |    |    |
| O-O_2  | -1 | -4.12978  | 1.61498  | 2.06855  | L |      |    |    |    |
| O-O_2  | -1 | 3.19286   | -8.51879 | -2.04412 | L |      |    |    |    |
| O-O_2  | -1 | -10.46113 | 1.58662  | 2.07466  | L |      |    |    |    |
| O-O_2  | -1 | -3.13849  | -8.54714 | -2.03801 | L |      |    |    |    |
| O-O_2  | -1 | 2.34844   | 4.14737  | -2.07184 | L |      |    |    |    |
| O-O_2  | -1 | -4.88318  | -6.03302 | 2.0865   | L |      |    |    |    |
| O-O_2  | -1 | -2.40761  | 4.12607  | -2.06726 | L |      |    |    |    |
| O-O_2  | 0  | 2.22866   | -4.14452 | 2.13262  | H |      |    |    |    |
| O-O_2  | -1 | -2.24564  | -4.21334 | 2.07366  | L | H-H_ | 73 | 0. | 0. |
| Si-Si3 | -1 | -0.0258   | 4.76756  | 0.55282  | L |      |    |    |    |
| O-O_R  | -1 | -7.26798  | -4.13625 | 3.68793  | L |      |    |    |    |
| Si-    | -1 | -7.26139  | -5.39181 | 4.69572  | L |      |    |    |    |
| Si-Si3 | -1 | -7.27526  | -2.52755 | 3.61917  | L |      |    |    |    |

|        |    |           |          |          |   |      |     |    |    |
|--------|----|-----------|----------|----------|---|------|-----|----|----|
| Si-Si3 | -1 | -0.02731  | 4.79542  | 3.57768  | L |      |     |    |    |
| O-O_R  | -1 | -7.27104  | -4.14347 | 0.48109  | L |      |     |    |    |
| Si-    | -1 | -7.26637  | -5.40356 | -0.52104 | L |      |     |    |    |
| Si-Si3 | -1 | -7.27819  | -2.53447 | 0.54262  | L |      |     |    |    |
| O-O_2  | -1 | -7.30395  | 4.08863  | 4.59093  | L |      |     |    |    |
| Si-Si3 | -1 | -7.29668  | 2.47993  | 4.65994  | L |      |     |    |    |
| O-O_2  | -1 | 0.00666   | -5.98223 | 0.54898  | H |      |     |    |    |
| Si-Si3 | 0  | -0.04282  | -4.79033 | -0.60047 | H |      |     |    |    |
| Si-Si3 | -1 | 0.02553   | -7.65383 | 0.54718  | L | H-H_ | 120 | 0. | 0. |
| O-O_2  | -1 | -7.30877  | 4.07725  | -0.45888 | L |      |     |    |    |
| Si-Si3 | -1 | -7.30162  | 2.46826  | -0.52065 | L |      |     |    |    |
| O-O_2  | -1 | 0.02132   | -6.03792 | 3.68526  | L |      |     |    |    |
| Si-Si3 | -1 | 0.01664   | -4.77783 | 4.68739  | L |      |     |    |    |
| Si-Si3 | -1 | 0.02846   | -7.64691 | 3.62373  | L |      |     |    |    |
| O-O_2  | -1 | -4.20613  | -0.01032 | 4.13646  | L |      |     |    |    |
| O-O_2  | -1 | -10.36974 | -0.04721 | 0.01408  | L |      |     |    |    |
| O-O_2  | -1 | -10.3658  | -0.03791 | 4.1424   | L |      |     |    |    |
| O-O_2  | -1 | -4.22151  | -0.03194 | -0.01742 | L |      |     |    |    |
| O-O_2  | -1 | -3.62286  | -5.08597 | 4.18301  | L |      |     |    |    |
| O-O_2  | -1 | -3.64994  | -5.08836 | -0.13674 | L | H-H_ | 73  | 0. | 0. |
| O-O_2  | -1 | 8.58732   | -1.90907 | -3.90968 | L |      |     |    |    |
| Si-Si3 | -1 | 10.11161  | -1.47502 | -3.63715 | L |      |     |    |    |
| O-O_2  | -1 | 8.56953   | 1.96581  | -4.35585 | L |      |     |    |    |
| Si-Si3 | -1 | 10.09712  | 1.54544  | -4.63132 | L |      |     |    |    |
| O-O_2  | -1 | 5.9484    | 1.95407  | -4.35332 | L |      |     |    |    |
| Si-Si3 | -1 | 4.42411   | 1.52003  | -4.62585 | L |      |     |    |    |
| O-O_2  | -1 | 3.8451    | -7.66988 | -4.43962 | L |      |     |    |    |
| O-O_2  | -1 | 5.96619   | -1.92081 | -3.90715 | L |      |     |    |    |
| O-O_2  | -1 | 5.98262   | -6.2511  | -3.8065  | L |      |     |    |    |
| Si-Si3 | -1 | 4.43861   | -1.50043 | -3.63171 | L | H-H_ | 180 | 0. | 0. |
| Si-Si3 | -1 | 4.59438   | -6.25915 | -4.62335 | L |      |     |    |    |
| O-O_2  | -1 | 7.28584   | -4.08963 | -4.583   | L |      |     |    |    |
| Si-Si3 | -1 | 7.29244   | -5.34519 | -3.57521 | L |      |     |    |    |
| Si-Si3 | -1 | 7.27857   | -2.48093 | -4.65176 | L |      |     |    |    |
| O-O_2  | -1 | 7.24988   | 4.13525  | -3.68    | L |      |     |    |    |
| Si-Si3 | -1 | 7.25715   | 2.52654  | -3.61124 | L |      |     |    |    |
| O-O_2  | -1 | 10.34769  | 0.0363   | -4.13447 | L |      |     |    |    |
| O-O_2  | -1 | 4.18803   | 0.00871  | -4.12853 | L |      |     |    |    |
| O-O_2  | -1 | 3.65019   | -5.07195 | -4.08115 | L |      |     |    |    |
| O-O_2  | -1 | 8.5952    | -1.89047 | 4.34746  | L |      |     |    |    |
| Si-Si3 | -1 | 10.11948  | -1.45642 | 4.61999  | L |      |     |    |    |
| O-O_2  | -1 | 6.06404   | -1.85361 | -0.39998 | H |      |     |    |    |
| O-O_2  | -1 | 5.98597   | -6.24319 | -0.29721 | L |      |     |    |    |
| Si-Si3 | 0  | 4.52093   | -1.46397 | -0.54527 | H |      |     |    |    |

|        |    |          |          |          |   |      |     |    |    |
|--------|----|----------|----------|----------|---|------|-----|----|----|
| Si-Si3 | -1 | 4.59928  | -6.24755 | 0.52231  | L | H-H_ | 198 | 0. | 0. |
| O-O_2  | -1 | 8.57741  | 1.98441  | 3.90105  | L |      |     |    |    |
| Si-Si3 | -1 | 10.105   | 1.56403  | 3.62558  | L |      |     |    |    |
| O-O_2  | -1 | 3.84967  | -7.6591  | 0.34612  | L |      |     |    |    |
| O-O_2  | -1 | 5.95276  | 1.96431  | 0.21271  | L | H-H_ | 163 | 0. | 0. |
| Si-Si3 | -1 | 4.45654  | 1.54611  | 0.49373  | H |      |     |    |    |
| O-O_2  | -1 | 5.95628  | 1.97267  | 3.90357  | L |      |     |    |    |
| Si-Si3 | -1 | 4.43199  | 1.53863  | 3.63105  | L |      |     |    |    |
| O-O_2  | -1 | 8.57389  | 1.9761   | 0.21018  | L |      |     |    |    |
| Si-Si3 | -1 | 10.102   | 1.55696  | 0.48462  | L |      |     |    |    |
| O-O_2  | -1 | 3.85298  | -7.65128 | 3.81752  | L |      |     |    |    |
| O-O_2  | -1 | 5.97406  | -1.90221 | 4.34999  | L |      |     |    |    |
| O-O_2  | -1 | 5.9905   | -6.2325  | 4.45039  | L |      |     |    |    |
| Si-Si3 | -1 | 4.44648  | -1.48183 | 4.62546  | L |      |     |    |    |
| Si-Si3 | -1 | 4.60226  | -6.24056 | 3.63354  | L |      |     |    |    |
| O-O_2  | -1 | 8.59084  | -1.90075 | -0.21881 | L |      |     |    |    |
| Si-Si3 | -1 | 10.1146  | -1.46795 | -0.4962  | L |      |     |    |    |
| O-O_2  | -1 | 7.2915   | -4.80914 | -2.05638 | L |      |     |    |    |
| O-O_2  | -1 | 7.25209  | 4.87336  | 2.05036  | L |      |     |    |    |
| O-O_2  | -1 | 7.28285  | -1.99045 | 2.06579  | L |      |     |    |    |
| O-O_2  | -1 | 7.26075  | 2.05467  | -2.07181 | L |      |     |    |    |
| O-O_2  | -1 | 10.44302 | -1.58763 | -2.06665 | L |      |     |    |    |
| O-O_2  | -1 | 3.98214  | -1.71211 | -2.04598 | H |      |     |    |    |
| O-O_2  | -1 | 10.43236 | 1.6802   | 2.05452  | L |      |     |    |    |
| O-O_2  | -1 | 4.10057  | 1.65185  | 2.06063  | L | H-H_ | 163 | 0. | 0. |
| O-O_2  | -1 | 4.92292  | -5.9891  | 2.07705  | L |      |     |    |    |
| O-O_2  | -1 | 7.29372  | -4.07103 | 3.6739   | L |      |     |    |    |
| Si-Si3 | -1 | 7.30031  | -5.3266  | 4.68168  | L |      |     |    |    |
| Si-Si3 | -1 | 7.28645  | -2.46233 | 3.60513  | L |      |     |    |    |
| O-O_2  | -1 | 7.29066  | -4.07826 | 0.46705  | L |      |     |    |    |
| Si-Si3 | -1 | 7.29534  | -5.33835 | -0.53508 | L |      |     |    |    |
| Si-Si3 | -1 | 7.28351  | -2.46926 | 0.52858  | L | H-H_ | 155 | 0. | 0. |
| O-O_2  | -1 | 7.25775  | 4.15385  | 4.57689  | L |      |     |    |    |
| Si-Si3 | -1 | 7.26502  | 2.54514  | 4.6459   | L |      |     |    |    |
| O-O_2  | -1 | 7.25293  | 4.14247  | -0.47291 | L |      |     |    |    |
| Si-Si3 | -1 | 7.26007  | 2.5335   | -0.53469 | L |      |     |    |    |
| O-O_2  | -1 | 10.35557 | 0.0549   | 4.12242  | L |      |     |    |    |
| O-O_2  | 0  | 4.24006  | 0.0359   | -0.04362 | H |      |     |    |    |
| O-O_2  | -1 | 4.1959   | 0.02731  | 4.12836  | L |      |     |    |    |
| O-O_2  | -1 | 10.35163 | 0.0456   | -0.0059  | L |      |     |    |    |
| O-O_2  | 0  | 3.75852  | -5.0662  | -0.16924 | H |      |     |    |    |
| O-O_2  | -1 | 3.65806  | -5.05336 | 4.17599  | L | H-H_ | 80  | 0. | 0. |
| O-O_2  | -1 | -1.36081 | 8.20267  | -4.36042 | L |      |     |    |    |
| O-O_2  | -1 | -3.87109 | 7.65028  | -3.80934 | L |      |     |    |    |

|        |    |          |         |          |   |
|--------|----|----------|---------|----------|---|
| Si-Si3 | -1 | -2.88892 | 8.62181 | -4.63487 | L |
| O-O_2  | -1 | -6.00904 | 6.2315  | -4.44246 | L |
| Si-Si3 | -1 | -4.62037 | 6.23955 | -3.62561 | L |
| O-O_2  | -1 | 1.26032  | 8.21442 | -4.36295 | L |
| Si-Si3 | -1 | 2.78452  | 8.64722 | -4.64034 | L |
| O-O_2  | -1 | -0.03986 | 6.0363  | -3.67733 | L |
| Si-Si3 | -1 | -0.04701 | 7.6453  | -3.6158  | L |
| Si-Si3 | -1 | -7.31842 | 5.32498 | -4.67375 | L |
| O-O_2  | -1 | -3.67632 | 5.05215 | -4.16781 | L |
| O-O_2  | -1 | 1.26468  | 8.2247  | 0.20308  | L |
| Si-Si3 | -1 | 2.7894   | 8.65874 | 0.4756   | L |
| O-O_2  | -1 | -1.35294 | 8.22127 | 3.89647  | L |
| O-O_2  | -1 | -3.86322 | 7.66887 | 4.44755  | L |
| Si-Si3 | -1 | -2.88105 | 8.64041 | 3.62203  | L |
| O-O_2  | -1 | -6.00117 | 6.25009 | 3.81443  | L |
| Si-Si3 | -1 | -4.61249 | 6.25815 | 4.63153  | L |
| O-O_2  | -1 | -6.00451 | 6.24219 | 0.30539  | L |
| Si-Si3 | -1 | -4.6174  | 6.24656 | -0.51439 | L |
| O-O_2  | -1 | -1.35646 | 8.21296 | 0.2056   | L |
| O-O_2  | -1 | -3.86778 | 7.65809 | -0.33819 | L |
| Si-Si3 | -1 | -2.88404 | 8.63333 | 0.48107  | L |
| O-O_2  | -1 | 1.2682   | 8.23301 | 3.89394  | L |
| Si-Si3 | -1 | 2.7924   | 8.66582 | 3.61656  | L |
| O-O_2  | -1 | -0.03114 | 5.32401 | 2.05629  | L |
| O-O_2  | -1 | -0.04767 | 8.1241  | -2.07851 | L |
| O-O_2  | -1 | 3.12038  | 8.54614 | 2.04603  | L |
| O-O_2  | -1 | -3.21097 | 8.51778 | 2.05213  | L |
| O-O_2  | -1 | -4.94102 | 5.98748 | -2.06903 | L |
| O-O_2  | -1 | -0.0368  | 6.04353 | -0.47024 | L |
| Si-Si3 | -1 | -0.04407 | 7.65223 | -0.53925 | L |
| O-O_2  | -1 | -0.03198 | 6.0549  | 4.57956  | L |
| Si-Si3 | -1 | -0.03913 | 7.6639  | 4.64134  | L |
| Si-Si3 | -1 | -7.31054 | 5.34358 | 3.58339  | L |
| Si-Si3 | -1 | -7.31344 | 5.33673 | 0.54301  | L |
| O-O_2  | -1 | -3.66844 | 5.07075 | 4.08908  | L |
| O-O_2  | -1 | -3.67231 | 5.06161 | 0.0316   | L |
| O-O_2  | -1 | 5.92585  | 6.28495 | -4.45396 | L |
| Si-Si3 | -1 | 4.53918  | 6.28057 | -3.63444 | L |
| O-O_2  | -1 | 3.77694  | 7.68453 | -3.81672 | L |
| Si-Si3 | -1 | 7.24328  | 5.3902  | -4.68779 | L |
| O-O_2  | -1 | 3.60461  | 5.08476 | -4.17483 | L |
| O-O_2  | -1 | 3.78025  | 7.69235 | -0.34557 | L |
| O-O_2  | -1 | 5.93038  | 6.29564 | 0.29388  | L |
| Si-Si3 | -1 | 4.54214  | 6.28758 | -0.52322 | L |



|        |    |           |          |          |   |
|--------|----|-----------|----------|----------|---|
| O-O_2  | -1 | 5.93373   | 6.30354  | 3.80293  | L |
| Si-Si3 | -1 | 4.54705   | 6.29917  | 4.6227   | L |
| O-O_2  | -1 | 3.78481   | 7.70312  | 4.44018  | L |
| O-O_2  | -1 | 4.86507   | 6.0314   | -2.07849 | L |
| Si-Si3 | -1 | 7.25116   | 5.4088   | 3.56935  | L |
| Si-Si3 | -1 | 7.24826   | 5.40195  | 0.52897  | L |
| O-O_2  | -1 | 3.60861   | 5.09422  | 0.02458  | L |
| O-O_2  | -1 | 3.61248   | 5.10336  | 4.08206  | L |
| H-H_   | -1 | -3.08969  | 9.83732  | -4.24037 | L |
| H-H_   | -1 | -3.08556  | 9.84706  | 0.08148  | L |
| H-H_   | -1 | -3.08181  | 9.85592  | 4.01652  | L |
| H-H_   | -1 | 2.9748    | 9.86453  | -4.2462  | L |
| H-H_   | -1 | 2.97892   | 9.87427  | 0.07562  | L |
| H-H_   | -1 | 2.98268   | 9.88313  | 4.0107   | L |
| H-H_   | -1 | 8.29594   | 6.11874  | -4.50191 | L |
| H-H_   | -1 | 8.30058   | 6.12965  | 0.338    | L |
| H-H_   | -1 | 8.30384   | 6.13735  | 3.75504  | L |
| H-H_   | -1 | 10.88785  | 2.32933  | -3.97279 | L |
| H-H_   | -1 | 10.89147  | 2.33788  | -0.17893 | L |
| H-H_   | -1 | 10.89572  | 2.34793  | 4.2841   | L |
| H-H_   | -1 | 10.3603   | 1.63883  | -5.89441 | L |
| H-H_   | -1 | -8.3772   | 6.04406  | -4.48583 | L |
| H-H_   | -1 | -8.37261  | 6.05498  | 0.35407  | L |
| H-H_   | -1 | -8.36935  | 6.06268  | 3.77111  | L |
| H-H_   | -1 | -10.93447 | 2.2316   | -3.95176 | L |
| H-H_   | -1 | -10.93085 | 2.24014  | -0.1579  | L |
| H-H_   | -1 | -10.92659 | 2.2502   | 4.30514  | L |
| H-H_   | -1 | -10.37854 | -1.63996 | 5.90269  | L |
| H-H_   | -1 | -10.90639 | -2.33095 | 3.98097  | L |
| H-H_   | -1 | -10.91001 | -2.3395  | 0.18687  | L |
| H-H_   | -1 | -10.91427 | -2.34955 | -4.27617 | L |
| H-H_   | -1 | -8.32215  | -6.13861 | -3.7471  | L |
| H-H_   | -1 | 10.90805  | -2.25181 | -4.29721 | L |
| H-H_   | -1 | 10.91231  | -2.24176 | 0.16583  | L |
| H-H_   | -1 | 10.91593  | -2.23321 | 3.95994  | L |
| H-H_   | -1 | 10.38595  | -1.54696 | 5.8826   | L |
| H-H_   | -1 | 8.35144   | -6.06393 | -3.76317 | L |
| H-H_   | -1 | 8.3547    | -6.05624 | -0.3459  | L |
| H-H_   | -1 | 8.35931   | -6.04534 | 4.49372  | L |
| H-H_   | -1 | 3.07123   | -9.83832 | 4.24835  | L |
| H-H_   | -1 | 3.1361    | -8.52421 | 5.90531  | L |
| H-H_   | -1 | -2.99325  | -9.86543 | 4.25421  | L |
| H-H_   | -1 | -3.06635  | -8.55199 | 5.91129  | L |
| H-H_   | -1 | -2.99737  | -9.87516 | -0.06753 | L |

|        |    |           |          |          |   |
|--------|----|-----------|----------|----------|---|
| H-H_   | -1 | -3.00113  | -9.88409 | -4.00275 | L |
| H-H_   | -1 | 3.0671    | -9.84805 | -0.07336 | L |
| H-H_   | -1 | 3.06336   | -9.85698 | -4.00861 | L |
| H-H_   | -1 | 4.85218   | -6.05699 | -5.87478 | L |
| H-H_   | -1 | 7.27568   | -2.10182 | -5.88856 | L |
| H-H_   | -1 | 0.02112   | -8.05019 | -5.86824 | L |
| H-H_   | -1 | 2.44506   | -4.095   | -5.8769  | L |
| H-H_   | -1 | 7.24403   | 4.9601   | -5.9078  | L |
| H-H_   | -1 | 4.15768   | 1.61105  | -5.88844 | L |
| H-H_   | -1 | -2.43773  | -4.11687 | -5.87219 | L |
| H-H_   | -1 | -4.82717  | -6.10034 | -5.86545 | L |
| H-H_   | -1 | 3.04821   | 8.551    | -5.90311 | L |
| H-H_   | -1 | -0.03826  | 5.20141  | -5.90139 | L |
| H-H_   | -1 | -7.28602  | -2.16703 | -5.87452 | L |
| H-H_   | -1 | -4.20174  | 1.57361  | -5.88045 | L |
| H-H_   | -1 | -3.15418  | 8.52322  | -5.89714 | L |
| H-H_   | -1 | -7.31767  | 4.89489  | -5.89376 | L |
| H-H_   | -1 | -10.40413 | 1.54583  | -5.87447 | L |
| H-H_   | -1 | -7.29379  | 2.10078  | 5.89672  | L |
| H-H_   | -1 | -4.8703   | 6.05549  | 5.88287  | L |
| H-H_   | -1 | -0.03966  | 8.04861  | 5.87641  | L |
| H-H_   | -1 | -2.46316  | 4.09389  | 5.885    | L |
| H-H_   | -1 | -7.26214  | -4.9613  | 5.91558  | L |
| H-H_   | -1 | -4.17609  | -1.61219 | 5.89671  | L |
| H-H_   | -1 | 2.41961   | 4.11576  | 5.88029  | L |
| H-H_   | -1 | 4.80907   | 6.09884  | 5.87354  | L |
| H-H_   | -1 | 0.01972   | -5.20284 | 5.90918  | L |
| H-H_   | -1 | 4.18326   | -1.57474 | 5.88858  | L |
| H-H_   | -1 | 7.26791   | 2.16599  | 5.88269  | L |
| H-H_   | -1 | 7.29956   | -4.89609 | 5.90154  | L |
| Al-Al3 | 0  | 2.62114   | -4.02325 | 0.50948  | H |
| H-H_   | 0  | -0.03132  | -2.39255 | 1.80367  | H |
| C-C_3  | 0  | -0.21993  | -1.43442 | 1.31212  | H |
| C-C_3  | 0  | 0.79558   | -1.16433 | 0.19699  | H |
| H-H_   | 0  | -1.2469   | -1.42063 | 0.93582  | H |
| H-H_   | 0  | -0.14023  | -0.64719 | 2.0698   | H |
| C-C_3  | 0  | 0.87898   | -2.25292 | -0.877   | H |
| C-C_3  | 0  | 0.49863   | 0.15572  | -0.53857 | H |
| H-H_   | 0  | -0.06213  | -2.30792 | -1.42704 | H |
| H-H_   | 0  | 1.70016   | -2.04942 | -1.5648  | H |
| H-H_   | 0  | 1.26187   | 0.37414  | -1.29267 | H |
| H-H_   | 0  | -0.48183  | 0.12528  | -1.03062 | H |
| H-H_   | 0  | 0.4881    | 0.99501  | 0.16159  | H |
| H-H_   | 0  | 1.78457   | -1.07823 | 0.65158  | H |

**S8. The coordinates for the adsorption of isobutene on HZSM-48**

|        |    |           |          |          |   |      |    |    |    |
|--------|----|-----------|----------|----------|---|------|----|----|----|
| O-O_2  | -1 | -5.97438  | -1.97428 | -3.89564 | L |      |    |    |    |
| O-O_2  | -1 | -3.45925  | -2.50664 | -4.44428 | L |      |    |    |    |
| O-O_2  | -1 | -5.95227  | -6.30455 | -3.795   | L |      |    |    |    |
| Si-Si3 | -1 | -4.4501   | -1.54024 | -3.62311 | L |      |    |    |    |
| Si-Si3 | -1 | -4.56516  | -6.30018 | -4.61452 | L |      |    |    |    |
| O-O_2  | -1 | -1.34412  | 3.87136  | -4.44159 | L |      |    |    |    |
| Si-Si3 | -1 | -2.73122  | 3.86699  | -3.62207 | L |      |    |    |    |
| O-O_2  | -1 | -5.99217  | 1.90059  | -4.34181 | L |      |    |    |    |
| O-O_2  | -1 | -3.48085  | 2.45546  | -3.79801 | L |      |    |    |    |
| Si-Si3 | -1 | -4.46458  | 1.48022  | -4.61728 | L |      |    |    |    |
| O-O_2  | -1 | -1.28674  | -8.23402 | -3.88601 | L |      |    |    |    |
| O-O_2  | -1 | -3.80292  | -7.70413 | -4.43225 | L |      |    |    |    |
| O-O_2  | -1 | -1.30868  | -3.90334 | -3.80484 | L |      |    |    |    |
| Si-Si3 | -1 | -2.8105   | -8.66682 | -3.60863 | L |      |    |    |    |
| Si-Si3 | -1 | -2.69735  | -3.9114  | -4.62168 | L |      |    |    |    |
| O-O_2  | -1 | -8.6133   | 1.88886  | -4.33928 | L |      |    |    |    |
| O-O_2  | -1 | 3.43326   | 2.48643  | -3.80468 | L |      |    |    |    |
| Si-Si3 | -1 | -10.13803 | 1.45481  | -4.61181 | L |      |    |    |    |
| O-O_2  | -1 | 1.33439   | -8.22228 | -3.88854 | L |      |    |    |    |
| O-O_2  | -1 | 1.31813   | -3.89158 | -3.80737 | L |      |    |    |    |
| Si-Si3 | -1 | 2.86294   | -8.64141 | -3.6141  | L |      |    |    |    |
| Si-Si3 | -1 | 2.70524   | -3.88721 | -4.62689 | L |      |    |    |    |
| O-O_2  | -1 | -8.59552  | -1.98602 | -3.89312 | L |      |    |    |    |
| O-O_2  | -1 | 3.45486   | -2.47567 | -4.45095 | L |      |    |    |    |
| Si-Si3 | -1 | -10.12354 | -1.56565 | -3.61765 | L |      |    |    |    |
| O-O_2  | -1 | 1.2827    | 3.88313  | -4.44413 | L |      |    |    |    |
| Si-Si3 | -1 | 2.67137   | 3.89119  | -3.62728 | L |      |    |    |    |
| O-O_2  | -1 | -7.27586  | -4.15485 | -4.56896 | L |      |    |    |    |
| Si-Si3 | -1 | -7.26926  | -5.41041 | -3.56118 | L |      |    |    |    |
| Si-Si3 | -1 | -7.28313  | -2.54615 | -4.63772 | L |      |    |    |    |
| Si-Si3 | -1 | -0.03518  | 4.77682  | -4.67946 | L |      |    |    |    |
| O-O_2  | -1 | -7.31183  | 4.07003  | -3.66597 | L |      |    |    |    |
| Si-Si3 | -1 | -7.30455  | 2.46133  | -3.5972  | L |      |    |    |    |
| O-O_2  | -1 | 0.01344   | -6.05652 | -4.57163 | L |      |    |    |    |
| Si-Si3 | -1 | 0.00876   | -4.79642 | -3.5695  | L | H-H_ | 95 | 0. | 0. |
| Si-Si3 | -1 | 0.02059   | -7.66551 | -4.63316 | L |      |    |    |    |
| O-O_2  | -1 | -4.21401  | -0.02892 | -4.12043 | L |      |    |    |    |
| O-O_2  | -1 | -10.37367 | -0.05651 | -4.11449 | L |      |    |    |    |
| O-O_2  | -1 | -3.63074  | -5.10456 | -4.07413 | L |      |    |    |    |
| O-O_2  | -1 | 1.31195   | 3.84986  | 0.29242  | L |      |    |    |    |
| Si-Si3 | -1 | 2.71188   | 3.88772  | -0.55504 | L |      |    |    |    |
| O-O_2  | -1 | -5.96651  | -1.95569 | 4.3615   | L |      |    |    |    |

|        |    |           |          |          |   |      |     |    |    |
|--------|----|-----------|----------|----------|---|------|-----|----|----|
| O-O_2  | -1 | -3.45137  | -2.48804 | 3.81286  | L |      |     |    |    |
| O-O_R  | -1 | -5.9444   | -6.28595 | 4.46189  | L |      |     |    |    |
| Si-Si3 | -1 | -4.44222  | -1.52164 | 4.63402  | L |      |     |    |    |
| Si-Si3 | -1 | -4.55729  | -6.28158 | 3.64237  | L |      |     |    |    |
| O-O_2  | -1 | -1.33624  | 3.88996  | 3.8153   | L |      |     |    |    |
| Si-Si3 | -1 | -2.72335  | 3.88559  | 4.63507  | L |      |     |    |    |
| O-O_2  | -1 | -8.592    | -1.97771 | -0.20225 | L |      |     |    |    |
| O-O_3  | 0  | 3.46162   | -2.29756 | 0.46943  | H |      |     |    |    |
| Si-Si3 | -1 | -10.12054 | -1.55858 | -0.47669 | L |      |     |    |    |
| O-O_2  | -1 | -5.98429  | 1.91919  | 3.91508  | L |      |     |    |    |
| O-O_2  | -1 | -3.47297  | 2.47406  | 4.45888  | L |      |     |    |    |
| Si-Si3 | -1 | -4.45671  | 1.49882  | 3.63961  | L |      |     |    |    |
| O-O_2  | -1 | 1.33791   | -8.21397 | -0.19767 | L |      |     |    |    |
| O-O_2  | 0  | 1.2117    | -3.78211 | -0.47028 | H |      |     |    |    |
| Si-Si3 | -1 | 2.86594   | -8.63434 | -0.47314 | L |      |     |    |    |
| O-O_2  | -1 | -8.60894  | 1.89914  | 0.22674  | L |      |     |    |    |
| O-O_2  | -1 | 3.43377   | 2.44825  | -0.37569 | L | H-H_ | 163 | 0. | 0. |
| Si-Si3 | -1 | -10.13314 | 1.46633  | 0.50413  | L |      |     |    |    |
| O-O_2  | -1 | -1.27887  | -8.21542 | 4.37113  | L |      |     |    |    |
| O-O_2  | -1 | -3.79505  | -7.68553 | 3.82489  | L |      |     |    |    |
| O-O_2  | -1 | -1.3008   | -3.88474 | 4.45206  | L |      |     |    |    |
| Si-Si3 | -1 | -2.80263  | -8.64822 | 4.64852  | L |      |     |    |    |
| Si-Si3 | -1 | -2.68947  | -3.8928  | 3.6352   | L |      |     |    |    |
| O-O_2  | -1 | -8.60542  | 1.90745  | 3.91761  | L |      |     |    |    |
| O-O_2  | -1 | 3.44114   | 2.50502  | 4.45221  | L |      |     |    |    |
| Si-Si3 | -1 | -10.13015 | 1.47341  | 3.64508  | L |      |     |    |    |
| O-O_2  | -1 | -1.28322  | -8.2257  | -0.19515 | L |      |     |    |    |
| O-O_2  | -1 | -3.79836  | -7.69335 | 0.35349  | L |      |     |    |    |
| O-O_2  | 0  | -1.40144  | -3.86134 | -0.36014 | H |      |     |    |    |
| Si-Si3 | -1 | -2.80751  | -8.65975 | -0.46767 | L |      |     |    |    |
| Si-Si3 | -1 | -2.74963  | -3.91773 | 0.56113  | H |      |     |    |    |
| O-O_2  | -1 | -5.98781  | 1.91088  | 0.22422  | L |      |     |    |    |
| O-O_2  | -1 | -3.47754  | 2.46328  | -0.32687 | L |      |     |    |    |
| Si-Si3 | -1 | -4.481    | 1.48075  | 0.50002  | L |      |     |    |    |
| O-O_2  | -1 | 1.34227   | -8.20368 | 4.3686   | L |      |     |    |    |
| O-O_2  | -1 | 1.32601   | -3.87298 | 4.44952  | L | H-H_ | 80  | 0. | 0. |
| Si-Si3 | -1 | 2.87081   | -8.62282 | 4.64305  | L |      |     |    |    |
| Si-Si3 | 0  | 2.71312   | -3.8686  | 3.63001  | H |      |     |    |    |
| O-O_2  | -1 | -1.34468  | 3.84345  | 0.28372  | L |      |     |    |    |
| Si-Si3 | -1 | -2.75707  | 3.87568  | -0.5464  | L |      |     |    |    |
| O-O_2  | -1 | -8.58764  | -1.96743 | 4.36402  | L |      |     |    |    |
| O-O_2  | -1 | 3.46274   | -2.45707 | 3.80619  | L | H-H_ | 80  | 0. | 0. |
| Si-Si3 | -1 | -10.11566 | -1.54705 | 4.63949  | L |      |     |    |    |
| O-O_2  | -1 | 1.29057   | 3.90173  | 3.81277  | L |      |     |    |    |

|        |    |           |          |          |   |      |     |    |    |
|--------|----|-----------|----------|----------|---|------|-----|----|----|
| Si-Si3 | -1 | 2.67924   | 3.90979  | 4.62986  | L |      |     |    |    |
| O-O_2  | -1 | -6.08416  | -1.8723  | -0.39229 | L |      |     |    |    |
| O-O_2  | -1 | -3.60323  | -2.51667 | 0.48651  | L | H-H_ | 73  | 0. | 0. |
| O-O_R  | -1 | -5.94892  | -6.29664 | -0.2857  | L |      |     |    |    |
| Si-Si3 | -1 | -4.50172  | -1.5615  | -0.49395 | L |      |     |    |    |
| Si-Si3 | -1 | -4.56025  | -6.28859 | 0.53114  | L |      |     |    |    |
| O-O_R  | -1 | -7.2702   | -4.87436 | -2.04235 | L |      |     |    |    |
| O-O_2  | -1 | -7.30961  | 4.80814  | 2.06439  | L |      |     |    |    |
| O-O_2  | -1 | -0.03782  | -5.5026  | -2.06961 | H |      |     |    |    |
| O-O_2  | -1 | -7.27885  | -2.05567 | 2.07983  | L |      |     |    |    |
| O-O_2  | -1 | -7.30096  | 1.98945  | -2.05778 | L |      |     |    |    |
| O-O_2  | -1 | 0.02913   | -8.12572 | 2.08653  | L |      |     |    |    |
| O-O_2  | -1 | -3.98872  | -1.7521  | -2.03159 | L |      |     |    |    |
| O-O_2  | -1 | -10.45046 | -1.6812  | -2.04651 | L |      |     |    |    |
| O-O_2  | -1 | -4.12978  | 1.61498  | 2.06855  | L |      |     |    |    |
| O-O_2  | -1 | 3.19286   | -8.51879 | -2.04412 | L |      |     |    |    |
| O-O_2  | -1 | -10.46113 | 1.58662  | 2.07466  | L |      |     |    |    |
| O-O_2  | -1 | -3.13849  | -8.54714 | -2.03801 | L |      |     |    |    |
| O-O_2  | -1 | 2.34844   | 4.14737  | -2.07184 | L |      |     |    |    |
| O-O_2  | -1 | -4.88318  | -6.03302 | 2.0865   | L |      |     |    |    |
| O-O_2  | -1 | -2.40761  | 4.12607  | -2.06726 | L |      |     |    |    |
| O-O_2  | 0  | 2.22866   | -4.14452 | 2.13262  | H |      |     |    |    |
| O-O_2  | -1 | -2.24564  | -4.21334 | 2.07366  | L | H-H_ | 73  | 0. | 0. |
| Si-Si3 | -1 | -0.0258   | 4.76756  | 0.55282  | L |      |     |    |    |
| O-O_R  | -1 | -7.26798  | -4.13625 | 3.68793  | L |      |     |    |    |
| Si-    | -1 | -7.26139  | -5.39181 | 4.69572  | L |      |     |    |    |
| Si-Si3 | -1 | -7.27526  | -2.52755 | 3.61917  | L |      |     |    |    |
| Si-Si3 | -1 | -0.02731  | 4.79542  | 3.57768  | L |      |     |    |    |
| O-O_R  | -1 | -7.27104  | -4.14347 | 0.48109  | L |      |     |    |    |
| Si-    | -1 | -7.26637  | -5.40356 | -0.52104 | L |      |     |    |    |
| Si-Si3 | -1 | -7.27819  | -2.53447 | 0.54262  | L |      |     |    |    |
| O-O_2  | -1 | -7.30395  | 4.08863  | 4.59093  | L |      |     |    |    |
| Si-Si3 | -1 | -7.29668  | 2.47993  | 4.65994  | L |      |     |    |    |
| O-O_2  | -1 | 0.00666   | -5.98223 | 0.54898  | H |      |     |    |    |
| Si-Si3 | 0  | -0.04282  | -4.79033 | -0.60047 | H |      |     |    |    |
| Si-Si3 | -1 | 0.02553   | -7.65383 | 0.54718  | L | H-H_ | 120 | 0. | 0. |
| O-O_2  | -1 | -7.30877  | 4.07725  | -0.45888 | L |      |     |    |    |
| Si-Si3 | -1 | -7.30162  | 2.46826  | -0.52065 | L |      |     |    |    |
| O-O_2  | -1 | 0.02132   | -6.03792 | 3.68526  | L |      |     |    |    |
| Si-Si3 | -1 | 0.01664   | -4.77783 | 4.68739  | L |      |     |    |    |
| Si-Si3 | -1 | 0.02846   | -7.64691 | 3.62373  | L |      |     |    |    |
| O-O_2  | -1 | -4.20613  | -0.01032 | 4.13646  | L |      |     |    |    |
| O-O_2  | -1 | -10.36974 | -0.04721 | 0.01408  | L |      |     |    |    |
| O-O_2  | -1 | -10.3658  | -0.03791 | 4.1424   | L |      |     |    |    |

|        |    |          |          |          |   |      |     |    |    |
|--------|----|----------|----------|----------|---|------|-----|----|----|
| O-O_2  | -1 | -4.22151 | -0.03194 | -0.01742 | L |      |     |    |    |
| O-O_2  | -1 | -3.62286 | -5.08597 | 4.18301  | L |      |     |    |    |
| O-O_2  | -1 | -3.64994 | -5.08836 | -0.13674 | L | H-H_ | 73  | 0. | 0. |
| O-O_2  | -1 | 8.58732  | -1.90907 | -3.90968 | L |      |     |    |    |
| Si-Si3 | -1 | 10.11161 | -1.47502 | -3.63715 | L |      |     |    |    |
| O-O_2  | -1 | 8.56953  | 1.96581  | -4.35585 | L |      |     |    |    |
| Si-Si3 | -1 | 10.09712 | 1.54544  | -4.63132 | L |      |     |    |    |
| O-O_2  | -1 | 5.9484   | 1.95407  | -4.35332 | L |      |     |    |    |
| Si-Si3 | -1 | 4.42411  | 1.52003  | -4.62585 | L |      |     |    |    |
| O-O_2  | -1 | 3.8451   | -7.66988 | -4.43962 | L |      |     |    |    |
| O-O_2  | -1 | 5.96619  | -1.92081 | -3.90715 | L |      |     |    |    |
| O-O_2  | -1 | 5.98262  | -6.2511  | -3.8065  | L |      |     |    |    |
| Si-Si3 | -1 | 4.43861  | -1.50043 | -3.63171 | L | H-H_ | 180 | 0. | 0. |
| Si-Si3 | -1 | 4.59438  | -6.25915 | -4.62335 | L |      |     |    |    |
| O-O_2  | -1 | 7.28584  | -4.08963 | -4.583   | L |      |     |    |    |
| Si-Si3 | -1 | 7.29244  | -5.34519 | -3.57521 | L |      |     |    |    |
| Si-Si3 | -1 | 7.27857  | -2.48093 | -4.65176 | L |      |     |    |    |
| O-O_2  | -1 | 7.24988  | 4.13525  | -3.68    | L |      |     |    |    |
| Si-Si3 | -1 | 7.25715  | 2.52654  | -3.61124 | L |      |     |    |    |
| O-O_2  | -1 | 10.34769 | 0.0363   | -4.13447 | L |      |     |    |    |
| O-O_2  | -1 | 4.18803  | 0.00871  | -4.12853 | L |      |     |    |    |
| O-O_2  | -1 | 3.65019  | -5.07195 | -4.08115 | L |      |     |    |    |
| O-O_2  | -1 | 8.5952   | -1.89047 | 4.34746  | L |      |     |    |    |
| Si-Si3 | -1 | 10.11948 | -1.45642 | 4.61999  | L |      |     |    |    |
| O-O_2  | -1 | 6.06404  | -1.85361 | -0.39998 | H |      |     |    |    |
| O-O_2  | -1 | 5.98597  | -6.24319 | -0.29721 | L |      |     |    |    |
| Si-Si3 | 0  | 4.52093  | -1.46397 | -0.54527 | H |      |     |    |    |
| Si-Si3 | -1 | 4.59928  | -6.24755 | 0.52231  | L | H-H_ | 198 | 0. | 0. |
| O-O_2  | -1 | 8.57741  | 1.98441  | 3.90105  | L |      |     |    |    |
| Si-Si3 | -1 | 10.105   | 1.56403  | 3.62558  | L |      |     |    |    |
| O-O_2  | -1 | 3.84967  | -7.6591  | 0.34612  | L |      |     |    |    |
| O-O_2  | -1 | 5.95276  | 1.96431  | 0.21271  | L | H-H_ | 163 | 0. | 0. |
| Si-Si3 | -1 | 4.45654  | 1.54611  | 0.49373  | H |      |     |    |    |
| O-O_2  | -1 | 5.95628  | 1.97267  | 3.90357  | L |      |     |    |    |
| Si-Si3 | -1 | 4.43199  | 1.53863  | 3.63105  | L |      |     |    |    |
| O-O_2  | -1 | 8.57389  | 1.9761   | 0.21018  | L |      |     |    |    |
| Si-Si3 | -1 | 10.102   | 1.55696  | 0.48462  | L |      |     |    |    |
| O-O_2  | -1 | 3.85298  | -7.65128 | 3.81752  | L |      |     |    |    |
| O-O_2  | -1 | 5.97406  | -1.90221 | 4.34999  | L |      |     |    |    |
| O-O_2  | -1 | 5.9905   | -6.2325  | 4.45039  | L |      |     |    |    |
| Si-Si3 | -1 | 4.44648  | -1.48183 | 4.62546  | L |      |     |    |    |
| Si-Si3 | -1 | 4.60226  | -6.24056 | 3.63354  | L |      |     |    |    |
| O-O_2  | -1 | 8.59084  | -1.90075 | -0.21881 | L |      |     |    |    |
| Si-Si3 | -1 | 10.1146  | -1.46795 | -0.4962  | L |      |     |    |    |

|        |    |          |          |          |   |      |     |    |    |
|--------|----|----------|----------|----------|---|------|-----|----|----|
| O-O_2  | -1 | 7.2915   | -4.80914 | -2.05638 | L |      |     |    |    |
| O-O_2  | -1 | 7.25209  | 4.87336  | 2.05036  | L |      |     |    |    |
| O-O_2  | -1 | 7.28285  | -1.99045 | 2.06579  | L |      |     |    |    |
| O-O_2  | -1 | 7.26075  | 2.05467  | -2.07181 | L |      |     |    |    |
| O-O_2  | -1 | 10.44302 | -1.58763 | -2.06665 | L |      |     |    |    |
| O-O_2  | -1 | 3.98214  | -1.71211 | -2.04598 | H |      |     |    |    |
| O-O_2  | -1 | 10.43236 | 1.6802   | 2.05452  | L |      |     |    |    |
| O-O_2  | -1 | 4.10057  | 1.65185  | 2.06063  | L | H-H_ | 163 | 0. | 0. |
| O-O_2  | -1 | 4.92292  | -5.9891  | 2.07705  | L |      |     |    |    |
| O-O_2  | -1 | 7.29372  | -4.07103 | 3.6739   | L |      |     |    |    |
| Si-Si3 | -1 | 7.30031  | -5.3266  | 4.68168  | L |      |     |    |    |
| Si-Si3 | -1 | 7.28645  | -2.46233 | 3.60513  | L |      |     |    |    |
| O-O_2  | -1 | 7.29066  | -4.07826 | 0.46705  | L |      |     |    |    |
| Si-Si3 | -1 | 7.29534  | -5.33835 | -0.53508 | L |      |     |    |    |
| Si-Si3 | -1 | 7.28351  | -2.46926 | 0.52858  | L | H-H_ | 155 | 0. | 0. |
| O-O_2  | -1 | 7.25775  | 4.15385  | 4.57689  | L |      |     |    |    |
| Si-Si3 | -1 | 7.26502  | 2.54514  | 4.6459   | L |      |     |    |    |
| O-O_2  | -1 | 7.25293  | 4.14247  | -0.47291 | L |      |     |    |    |
| Si-Si3 | -1 | 7.26007  | 2.5335   | -0.53469 | L |      |     |    |    |
| O-O_2  | -1 | 10.35557 | 0.0549   | 4.12242  | L |      |     |    |    |
| O-O_2  | 0  | 4.24006  | 0.0359   | -0.04362 | H |      |     |    |    |
| O-O_2  | -1 | 4.1959   | 0.02731  | 4.12836  | L |      |     |    |    |
| O-O_2  | -1 | 10.35163 | 0.0456   | -0.0059  | L |      |     |    |    |
| O-O_2  | 0  | 3.75852  | -5.0662  | -0.16924 | H |      |     |    |    |
| O-O_2  | -1 | 3.65806  | -5.05336 | 4.17599  | L | H-H_ | 80  | 0. | 0. |
| O-O_2  | -1 | -1.36081 | 8.20267  | -4.36042 | L |      |     |    |    |
| O-O_2  | -1 | -3.87109 | 7.65028  | -3.80934 | L |      |     |    |    |
| Si-Si3 | -1 | -2.88892 | 8.62181  | -4.63487 | L |      |     |    |    |
| O-O_2  | -1 | -6.00904 | 6.2315   | -4.44246 | L |      |     |    |    |
| Si-Si3 | -1 | -4.62037 | 6.23955  | -3.62561 | L |      |     |    |    |
| O-O_2  | -1 | 1.26032  | 8.21442  | -4.36295 | L |      |     |    |    |
| Si-Si3 | -1 | 2.78452  | 8.64722  | -4.64034 | L |      |     |    |    |
| O-O_2  | -1 | -0.03986 | 6.0363   | -3.67733 | L |      |     |    |    |
| Si-Si3 | -1 | -0.04701 | 7.6453   | -3.6158  | L |      |     |    |    |
| Si-Si3 | -1 | -7.31842 | 5.32498  | -4.67375 | L |      |     |    |    |
| O-O_2  | -1 | -3.67632 | 5.05215  | -4.16781 | L |      |     |    |    |
| O-O_2  | -1 | 1.26468  | 8.2247   | 0.20308  | L |      |     |    |    |
| Si-Si3 | -1 | 2.7894   | 8.65874  | 0.4756   | L |      |     |    |    |
| O-O_2  | -1 | -1.35294 | 8.22127  | 3.89647  | L |      |     |    |    |
| O-O_2  | -1 | -3.86322 | 7.66887  | 4.44755  | L |      |     |    |    |
| Si-Si3 | -1 | -2.88105 | 8.64041  | 3.62203  | L |      |     |    |    |
| O-O_2  | -1 | -6.00117 | 6.25009  | 3.81443  | L |      |     |    |    |
| Si-Si3 | -1 | -4.61249 | 6.25815  | 4.63153  | L |      |     |    |    |
| O-O_2  | -1 | -6.00451 | 6.24219  | 0.30539  | L |      |     |    |    |

|        |    |          |         |          |   |
|--------|----|----------|---------|----------|---|
| Si-Si3 | -1 | -4.6174  | 6.24656 | -0.51439 | L |
| O-O_2  | -1 | -1.35646 | 8.21296 | 0.2056   | L |
| O-O_2  | -1 | -3.86778 | 7.65809 | -0.33819 | L |
| Si-Si3 | -1 | -2.88404 | 8.63333 | 0.48107  | L |
| O-O_2  | -1 | 1.2682   | 8.23301 | 3.89394  | L |
| Si-Si3 | -1 | 2.7924   | 8.66582 | 3.61656  | L |
| O-O_2  | -1 | -0.03114 | 5.32401 | 2.05629  | L |
| O-O_2  | -1 | -0.04767 | 8.1241  | -2.07851 | L |
| O-O_2  | -1 | 3.12038  | 8.54614 | 2.04603  | L |
| O-O_2  | -1 | -3.21097 | 8.51778 | 2.05213  | L |
| O-O_2  | -1 | -4.94102 | 5.98748 | -2.06903 | L |
| O-O_2  | -1 | -0.0368  | 6.04353 | -0.47024 | L |
| Si-Si3 | -1 | -0.04407 | 7.65223 | -0.53925 | L |
| O-O_2  | -1 | -0.03198 | 6.0549  | 4.57956  | L |
| Si-Si3 | -1 | -0.03913 | 7.6639  | 4.64134  | L |
| Si-Si3 | -1 | -7.31054 | 5.34358 | 3.58339  | L |
| Si-Si3 | -1 | -7.31344 | 5.33673 | 0.54301  | L |
| O-O_2  | -1 | -3.66844 | 5.07075 | 4.08908  | L |
| O-O_2  | -1 | -3.67231 | 5.06161 | 0.0316   | L |
| O-O_2  | -1 | 5.92585  | 6.28495 | -4.45396 | L |
| Si-Si3 | -1 | 4.53918  | 6.28057 | -3.63444 | L |
| O-O_2  | -1 | 3.77694  | 7.68453 | -3.81672 | L |
| Si-Si3 | -1 | 7.24328  | 5.3902  | -4.68779 | L |
| O-O_2  | -1 | 3.60461  | 5.08476 | -4.17483 | L |
| O-O_2  | -1 | 3.78025  | 7.69235 | -0.34557 | L |
| O-O_2  | -1 | 5.93038  | 6.29564 | 0.29388  | L |
| Si-Si3 | -1 | 4.54214  | 6.28758 | -0.52322 | L |
| O-O_2  | -1 | 5.93373  | 6.30354 | 3.80293  | L |
| Si-Si3 | -1 | 4.54705  | 6.29917 | 4.6227   | L |
| O-O_2  | -1 | 3.78481  | 7.70312 | 4.44018  | L |
| O-O_2  | -1 | 4.86507  | 6.0314  | -2.07849 | L |
| Si-Si3 | -1 | 7.25116  | 5.4088  | 3.56935  | L |
| Si-Si3 | -1 | 7.24826  | 5.40195 | 0.52897  | L |
| O-O_2  | -1 | 3.60861  | 5.09422 | 0.02458  | L |
| O-O_2  | -1 | 3.61248  | 5.10336 | 4.08206  | L |
| H-H_   | -1 | -3.08969 | 9.83732 | -4.24037 | L |
| H-H_   | -1 | -3.08556 | 9.84706 | 0.08148  | L |
| H-H_   | -1 | -3.08181 | 9.85592 | 4.01652  | L |
| H-H_   | -1 | 2.9748   | 9.86453 | -4.2462  | L |
| H-H_   | -1 | 2.97892  | 9.87427 | 0.07562  | L |
| H-H_   | -1 | 2.98268  | 9.88313 | 4.0107   | L |
| H-H_   | -1 | 8.29594  | 6.11874 | -4.50191 | L |
| H-H_   | -1 | 8.30058  | 6.12965 | 0.338    | L |
| H-H_   | -1 | 8.30384  | 6.13735 | 3.75504  | L |



|      |    |           |          |          |   |
|------|----|-----------|----------|----------|---|
| H-H_ | -1 | 10.88785  | 2.32933  | -3.97279 | L |
| H-H_ | -1 | 10.89147  | 2.33788  | -0.17893 | L |
| H-H_ | -1 | 10.89572  | 2.34793  | 4.2841   | L |
| H-H_ | -1 | 10.3603   | 1.63883  | -5.89441 | L |
| H-H_ | -1 | -8.3772   | 6.04406  | -4.48583 | L |
| H-H_ | -1 | -8.37261  | 6.05498  | 0.35407  | L |
| H-H_ | -1 | -8.36935  | 6.06268  | 3.77111  | L |
| H-H_ | -1 | -10.93447 | 2.2316   | -3.95176 | L |
| H-H_ | -1 | -10.93085 | 2.24014  | -0.1579  | L |
| H-H_ | -1 | -10.92659 | 2.2502   | 4.30514  | L |
| H-H_ | -1 | -10.37854 | -1.63996 | 5.90269  | L |
| H-H_ | -1 | -10.90639 | -2.33095 | 3.98097  | L |
| H-H_ | -1 | -10.91001 | -2.3395  | 0.18687  | L |
| H-H_ | -1 | -10.91427 | -2.34955 | -4.27617 | L |
| H-H_ | -1 | -8.32215  | -6.13861 | -3.7471  | L |
| H-H_ | -1 | 10.90805  | -2.25181 | -4.29721 | L |
| H-H_ | -1 | 10.91231  | -2.24176 | 0.16583  | L |
| H-H_ | -1 | 10.91593  | -2.23321 | 3.95994  | L |
| H-H_ | -1 | 10.38595  | -1.54696 | 5.8826   | L |
| H-H_ | -1 | 8.35144   | -6.06393 | -3.76317 | L |
| H-H_ | -1 | 8.3547    | -6.05624 | -0.3459  | L |
| H-H_ | -1 | 8.35931   | -6.04534 | 4.49372  | L |
| H-H_ | -1 | 3.07123   | -9.83832 | 4.24835  | L |
| H-H_ | -1 | 3.1361    | -8.52421 | 5.90531  | L |
| H-H_ | -1 | -2.99325  | -9.86543 | 4.25421  | L |
| H-H_ | -1 | -3.06635  | -8.55199 | 5.91129  | L |
| H-H_ | -1 | -2.99737  | -9.87516 | -0.06753 | L |
| H-H_ | -1 | -3.00113  | -9.88409 | -4.00275 | L |
| H-H_ | -1 | 3.0671    | -9.84805 | -0.07336 | L |
| H-H_ | -1 | 3.06336   | -9.85698 | -4.00861 | L |
| H-H_ | -1 | 4.85218   | -6.05699 | -5.87478 | L |
| H-H_ | -1 | 7.27568   | -2.10182 | -5.88856 | L |
| H-H_ | -1 | 0.02112   | -8.05019 | -5.86824 | L |
| H-H_ | -1 | 2.44506   | -4.095   | -5.8769  | L |
| H-H_ | -1 | 7.24403   | 4.9601   | -5.9078  | L |
| H-H_ | -1 | 4.15768   | 1.61105  | -5.88844 | L |
| H-H_ | -1 | -2.43773  | -4.11687 | -5.87219 | L |
| H-H_ | -1 | -4.82717  | -6.10034 | -5.86545 | L |
| H-H_ | -1 | 3.04821   | 8.551    | -5.90311 | L |
| H-H_ | -1 | -0.03826  | 5.20141  | -5.90139 | L |
| H-H_ | -1 | -7.28602  | -2.16703 | -5.87452 | L |
| H-H_ | -1 | -4.20174  | 1.57361  | -5.88045 | L |
| H-H_ | -1 | -3.15418  | 8.52322  | -5.89714 | L |
| H-H_ | -1 | -7.31767  | 4.89489  | -5.89376 | L |

|        |    |           |          |          |   |
|--------|----|-----------|----------|----------|---|
| H-H_   | -1 | -10.40413 | 1.54583  | -5.87447 | L |
| H-H_   | -1 | -7.29379  | 2.10078  | 5.89672  | L |
| H-H_   | -1 | -4.8703   | 6.05549  | 5.88287  | L |
| H-H_   | -1 | -0.03966  | 8.04861  | 5.87641  | L |
| H-H_   | -1 | -2.46316  | 4.09389  | 5.885    | L |
| H-H_   | -1 | -7.26214  | -4.9613  | 5.91558  | L |
| H-H_   | -1 | -4.17609  | -1.61219 | 5.89671  | L |
| H-H_   | -1 | 2.41961   | 4.11576  | 5.88029  | L |
| H-H_   | -1 | 4.80907   | 6.09884  | 5.87354  | L |
| H-H_   | -1 | 0.01972   | -5.20284 | 5.90918  | L |
| H-H_   | -1 | 4.18326   | -1.57474 | 5.88858  | L |
| H-H_   | -1 | 7.26791   | 2.16599  | 5.88269  | L |
| H-H_   | -1 | 7.29956   | -4.89609 | 5.90154  | L |
| AI-AI3 | 0  | 2.62114   | -4.02325 | 0.50948  | H |
| H-H_   | 0  | -0.30701  | -0.05053 | -3.06606 | H |
| C-C_3  | 0  | -0.75511  | 0.26198  | -2.11782 | H |
| C-C_2  | 0  | 0.11321   | -0.1081  | -0.94337 | H |
| H-H_   | 0  | -0.90174  | 1.34892  | -2.14579 | H |
| H-H_   | 0  | -1.74782  | -0.18935 | -2.03175 | H |
| C-C_2  | 0  | 1.3063    | -0.70155 | -1.10258 | H |
| C-C_3  | 0  | -0.40355  | 0.27353  | 0.41905  | H |
| H-H_   | 0  | 1.71521   | -0.92774 | -2.08251 | H |
| H-H_   | 0  | 1.9697    | -0.85426 | -0.25678 | H |
| H-H_   | 0  | -0.53674  | 1.35915  | 0.4844   | H |
| H-H_   | 0  | -1.38291  | -0.1796  | 0.60716  | H |
| H-H_   | 0  | 0.28624   | -0.03713 | 1.20838  | H |
| H-H_   | 0  | 1.18906   | -2.73744 | -0.51113 | H |
